# Supplementary material for: Systematic review of electron transfer study in DNA relevant to Parkinson’s disease and scanning tunneling microscopy
Source: PeerJ. 2025 Aug 20;13:e19807. doi: 10.7717/peerj.19807 (PMC12374687; doi:10.7717/peerj.19807)
Supplement: Supplemental Information 2 [file peerj-13-19807-s002.xlsx]

## Sheet: Articles
Authors	Document Type	Year	Title	Abstract	Screening (Include = 1, Exclude = 0, Maybe = 2)	Fulltext check (Available1, Not available=0 )	Language of Original Document	Topic/Reason	Source	Source title	Volume	Issue	Art. No.	Page start	Page end	Page count	DOI	Link	Affiliations	Authors with affiliations	Author Keywords	Index Keywords
Abha K., Sumithra I.S., Suji S., Anjana R.R., Anjali Devi J.S., Nebu J., Lekha G.M., Aparna R.S., George S.	Article	2020	Dopamine-induced photoluminescence quenching of bovine serum albumin–capped manganese-doped zinc sulphide quantum dots	The direct detection of dopamine (DA) in human body fluids is a great challenge for medical diagnostics of neurological disorders like Parkinson’s disease, Alzheimer’s disease, senile dementia, and schizophrenia. In this work, a simple and turn off luminescence sensing of DA based on bovine serum albumin (BSA)-capped manganese-doped zinc sulphide quantum dots (Mn:ZnS/BSA QDs) is developed. The Mn…	1	1	English	Quantum dots (QD), Dopamine (DA) detection	Scopus	Analytical and Bioanalytical Chemistry	412	23		5671	5681		10.1007/s00216-020-02787-2	https://www.scopus.com/inward/record.uri?eid=2-s2.0-85087505451&doi=10.1007%2fs00216-020-02787-2&partnerID=40&md5=0c6f08a533a0a3d8886e97a3fa314912	Department of Chemistry, School of Physical and Mathematical Sciences, University of Kerala, Kariavattom Campus, Thiruvananthapuram, 695581, India	Abha, K., Department of Chemistry, School of Physical and Mathematical Sciences, University of Kerala, Kariavattom Campus, Thiruvananthapuram, 695581, India; Sumithra, I.S., Department of Chemistry, School of Physical and Mathematical Sciences, University of Kerala, Kariavattom Campus, Thiruvananthapuram, 695581, India; Suji, S., Department of Chemistry, School of Physical and Mathematical Scienc…	Co-precipitation method; Neurotransmitters; Photoluminescence; Point of care diagnostic devices; Real sample assay	Amines; Body fluids; Diagnosis; Ground state; II-VI semiconductors; Luminescence; Mammals; Manganese compounds; Metal ions; Metals; Nanocrystals; Neurophysiology; Precipitation (chemical); Quenching; Quinone; Sulfur compounds; Zinc sulfide; Bovine serum albumins; Chemical coprecipitation method; Luminescence quenching; Medical diagnostics; Neurological disorders; Photo-induced electron transfer; …
Ajmala Shireen P., Muraleedharan K., Abdul Mujeeb V.M.	Article	2017	Identification of flavanones from Boesenbergia rotunda as potential antioxidants and monoamine oxidase B inhibitors	Boesenbergia rotunda is a ginger species with great medicinal importance. In this study, two flavanones found in B. rotunda namely pinocembrin and pinostrobin are analyzed for their antioxidant activity and monoamine oxidase inhibition. Frontier molecular orbitals and molecular electrostatic potential were analyzed to understand the electronic properties of these molecules. Quantum chemical descr…	2	0	English		Scopus	Chemical Papers	71	12		2473	2483		10.1007/s11696-017-0241-5	https://www.scopus.com/inward/record.uri?eid=2-s2.0-85023190291&doi=10.1007%2fs11696-017-0241-5&partnerID=40&md5=866e380eca9c2316d915deea320b9bc7	Department of Chemistry, University of Calicut, Malappuram, 673635, India	Ajmala Shireen, P., Department of Chemistry, University of Calicut, Malappuram, 673635, India; Muraleedharan, K., Department of Chemistry, University of Calicut, Malappuram, 673635, India; Abdul Mujeeb, V.M., Department of Chemistry, University of Calicut, Malappuram, 673635, India	Antioxidant; DFT; Flavanones; MAO; Pinocembrin; Pinostrobin
Anglade P., Larabi-Godinot Y., Tsuji S.	Article	2014	Electron transfers and holographic molecules: Why neuroscientists should take quantum phenomena into consideration	Discoveries concerning the neurotransmission mode of the nerve impulse contributed a lot to the development of modern neurosciences. Neurons release chemical agents, such as neurotransmitters and neuromodulators, which bind to receptors of their target cells, enabling, thus, propagation of nerve impulse from cell to cell. In the nervous system, intercellular exchanges of information take place as…	1	1	English	PD, EC, DNA, STM	Scopus	NeuroQuantology	12	2		237	246		10.14704/nq.2014.12.2.730	https://www.scopus.com/inward/record.uri?eid=2-s2.0-84902956730&doi=10.14704%2fnq.2014.12.2.730&partnerID=40&md5=f5c77d97cacadebcef4e5a023148d06e	28 bis Allée Maurice Piketty, 77310 Saint-Fargeau-Ponthierry, France; Centre Alexandre Koyré, Departement Hommes, Nature, Societes, Museum National d'Histoire Naturelle, 57 rue Cuvier, 75005 Paris, France	Anglade, P., 28 bis Allée Maurice Piketty, 77310 Saint-Fargeau-Ponthierry, France; Larabi-Godinot, Y., Centre Alexandre Koyré, Departement Hommes, Nature, Societes, Museum National d'Histoire Naturelle, 57 rue Cuvier, 75005 Paris, France; Tsuji, S., 28 bis Allée Maurice Piketty, 77310 Saint-Fargeau-Ponthierry, France	Electron transfers; Holographic molecules; Nervous system; Quantum memory; Receptor protein	absorption spectroscopy; article; brian function; chemical bond; consciousness; electron transport; human; molecular interaction; nerve conduction; neurotransmission; phenomenology; postsynaptic membrane; presynaptic membrane; quantum mechanics; scanning tunneling microscopy; sensorimotor function; signal transduction; synaptic transmission; transient absorption spectroscopy
Artés J.M., López-Martínez M., Díez-Pérez I., Sanz F., Gorostiza P.	Article	2014	Nanoscale charge transfer in redox proteins and DNA: Towards biomolecular electronics	Understanding how charges move through and between biomolecules is a fundamental question that constitutes the basis for many biological processes. On the other hand, it has potential applications in the design of sensors based on biomolecules and single molecule devices. In this review we introduce the study of the electron transfer (ET) process in biomolecules, providing an overview of the fund…	1	1	English	NOT related to PD, EC, DNA, STM	Scopus	Electrochimica Acta	140			83	95		10.1016/j.electacta.2014.05.089	https://www.scopus.com/inward/record.uri?eid=2-s2.0-84906946492&doi=10.1016%2fj.electacta.2014.05.089&partnerID=40&md5=0d0e297f999797269870a9f0e6625807	Institute for Bioengineering of Catalonia (IBEC), 15-21 Baldiri Reixac, 08028 Barcelona, Spain; Physical Chemistry Department, University of Barcelona (UB), 1-11 Martí i Franquès, 08028, Barcelona, Spain; Networking Research Center on Bioengineering, Biomaterials and Nanomedicine (CIBER-BBN), Spain; Institució Catalana de Recerca i Estudis Avançats (ICREA), Spain	Artés, J.M., Institute for Bioengineering of Catalonia (IBEC), 15-21 Baldiri Reixac, 08028 Barcelona, Spain, Physical Chemistry Department, University of Barcelona (UB), 1-11 Martí i Franquès, 08028, Barcelona, Spain; López-Martínez, M., Institute for Bioengineering of Catalonia (IBEC), 15-21 Baldiri Reixac, 08028 Barcelona, Spain, Physical Chemistry Department, University of Barcelona (UB), 1-11…	Bioelectrochemistry; Biomolecular electronics; Charge transfer; Nanobiodevice; Single-molecule junction	Biochemistry; Charge transfer; Electrophysiology; Molecules; Proteins; Scanning tunneling microscopy; Bioelectrochemistry; Biomolecular electronics; Electronic characterization; Experimental approaches; Nanobiodevice; Single-molecule devices; Single-molecule junctions; Technological applications; Nano scale; Redox proteins; Biomolecules; Charge transfer
Arvand M., Ghodsi N.	Article	2013	A voltammetric sensor based on graphene-modified electrode for the determination of trace amounts of l-dopa in mouse brain extract and pharmaceuticals	l-Dopa is the intermediate precursor of the neurotransmitter dopamine. Unlike dopamine, l-dopa easily enters the central nervous system. l-Dopa, as one of the catecholamines, is widely used as a source of dopamine in the treatment of most patients with Parkinson's disease and epilepsy. Graphene (GR) is ideally suited for implementation in electrochemical applications due to its reported large ele…	2	0	English		Scopus	Journal of Solid State Electrochemistry	17	3		775	784		10.1007/s10008-012-1929-7	https://www.scopus.com/inward/record.uri?eid=2-s2.0-84878489814&doi=10.1007%2fs10008-012-1929-7&partnerID=40&md5=2d2b40f598d83dc930f9161eaaef98c6	Department of Chemistry, Faculty of Science, University of Guilan, Namjoo Street, Rasht, Iran	Arvand, M., Department of Chemistry, Faculty of Science, University of Guilan, Namjoo Street, Rasht, Iran; Ghodsi, N., Department of Chemistry, Faculty of Science, University of Guilan, Namjoo Street, Rasht, Iran	Glassy carbon electrode; Graphene; l-Dopa; Modified Brodie method; Surface controlled	Amines; Chemical detection; Glass; Glass membrane electrodes; Neurophysiology; Oxidation; Patient treatment; Electrochemical applications; Electrochemical determination; Electrochemical measurements; Glassy carbon electrodes; Heterogeneous electron transfer; l-Dopa; Modified Brodie method; Relative standard deviations; Graphene
Atta N.F., Galal A., El-Said D.M.	Article	2019	Novel Design of a Layered Electrochemical Dopamine Sensor in Real Samples Based on Gold Nanoparticles/β-Cyclodextrin/Nafion-Modified Gold Electrode	Change in the level of dopamine (DA) concentration in the human body causes critical diseases such as schizophrenia and Parkinson's disease. Therefore, the determination of DA concentration and monitoring its level in human body fluids is of great importance. An electrochemical sensor based on modification of the gold electrode surface with Nafion (NF), β-cyclodextrin (CD), and gold nanoparticles…	1	1	English		Scopus	ACS Omega	4	19		17947	17955		10.1021/acsomega.9b01222	https://www.scopus.com/inward/record.uri?eid=2-s2.0-85074303441&doi=10.1021%2facsomega.9b01222&partnerID=40&md5=8367434519be491d0603981b24d9f82e	Chemistry Department, Faculty of Science, Cairo University, Giza, 12613, Egypt	Atta, N.F., Chemistry Department, Faculty of Science, Cairo University, Giza, 12613, Egypt; Galal, A., Chemistry Department, Faculty of Science, Cairo University, Giza, 12613, Egypt; El-Said, D.M., Chemistry Department, Faculty of Science, Cairo University, Giza, 12613, Egypt
Benecke R., Strümper P., Weiss H.	Article	1993	Electron transfer complexes I and IV of platelets are abnormal in parkinson's disease but normal in parkinson-plus syndromes	Summary: Using a technique which requires only 100 ml blood we investigated the electron transfer complexes (ETC) I, III and IV in platelet mitochondria of 44 control subjects, 27 patients with idiopathic Parkinson's disease and eight patients with Parkinson-plus syndromes due to multiple system atrophy. In both control subjects and patients, ETC measurements were repeated at intervals of several…	1	1	English		Scopus	Brain	116	6		1451	1463		10.1093/brain/116.6.1451	https://www.scopus.com/inward/record.uri?eid=2-s2.0-0027750939&doi=10.1093%2fbrain%2f116.6.1451&partnerID=40&md5=b3d1c726797fbfd830478fcd672c347b	Neurologische Klinik and the, Düsseldorf, Germany; Institut für Biochemie of the Heinrich-Heine-Universitas, Düsseldorf, Germany	Benecke, R., Neurologische Klinik and the, Düsseldorf, Germany; Strümper, P., Institut für Biochemie of the Heinrich-Heine-Universitas, Düsseldorf, Germany; Weiss, H., Institut für Biochemie of the Heinrich-Heine-Universitas, Düsseldorf, Germany		cytochrome c oxidase; levodopa; reduced nicotinamide adenine dinucleotide dehydrogenase (ubiquinone); ubiquinol cytochrome c reductase; adult; aged; article; clinical article; controlled study; disease duration; disease severity; electron transport; enzyme activity; human; mitochondrion; parkinson disease; parkinsonism; priority journal; thrombocyte; Aged; Aged, 80 and over; Blood Platelets; Cyto…
Benzi G., Moretti A.	Review	1995	Age- and peroxidative stress-related modifications of the cerebral enzymatic activities linked to mitochondria and the glutathione system	The aging brain undergoes a process of enhanced peroxidative stress, as shown by reports of altered membrane lipids, oxidized proteins, and damaged DNA. The aims of this review are to examine: (1) the possible contribution of mitochondrial processes to the formation and release of reactive oxygen species (ROS) in the aging brain; and (2) the age-related changes of antioxidant defenses, both enzym…	1	1	English		Scopus	Free Radical Biology and Medicine	19	1		77	101		10.1016/0891-5849(94)00244-E	https://www.scopus.com/inward/record.uri?eid=2-s2.0-0029012812&doi=10.1016%2f0891-5849%2894%2900244-E&partnerID=40&md5=e51b669dfb60a18a6fafce4136514e82	Institute of Pharmacology, Faculty of Science, University of Pavia, Italy	Benzi, G., Institute of Pharmacology, Faculty of Science, University of Pavia, Italy; Moretti, A., Institute of Pharmacology, Faculty of Science, University of Pavia, Italy	Antioxidant defenses; Brain aging; Electron transfer chain; Free radical; Glutathione; Mitochondria; Peroxidative stress	citrate synthase; glutamate dehydrogenase; glutathione; malate dehydrogenase; pyruvate dehydrogenase; reactive oxygen metabolite; reduced nicotinamide adenine dinucleotide dehydrogenase; superoxide dismutase; aged; aging; alzheimer disease; animal tissue; brain region; electron transport; enzyme activity; gerbil; human; mitochondrial energy transfer; mouse; nonhuman; oxidative stress; parkinson d…
Binienda Z., Virmani A.	Review	2003	The Mitochondriotropic Effects of L-carnitine and its Esters in the Central Nervous System	Mitochondrial defects have been linked to such devastating neurodegenerative diseases as Parkinson's, Huntington's, amyotrophic lateral sclerosis (ALS), multiple sclerosis (MS) and Alzheimer's as well as senile dementia's. Mitochondrial metabolic defects could affect the electron transport, the tricarboxylic acid cycle (TCA), and substrate transport. However, it is the escape of oxygen free radic…	0	0	English		Scopus	Current Medicinal Chemistry - Central Nervous System Agents	3	4		275	282		10.2174/1568015033477659	https://www.scopus.com/inward/record.uri?eid=2-s2.0-0345257085&doi=10.2174%2f1568015033477659&partnerID=40&md5=2c86e360467e640aa84e1f67cd64f2d1	Neurophysiology Laboratory, Division of Neurotoxicology, Natl. Ctr. for Toxicological Res., Jefferson, AR 72079, United States; Scientific Affairs, R and D, Sigma-Tau Health Science s.p.a., Via Treviso 4, 00040 Pomezia, Roma, Italy; Division of Neurotoxicology, HFT-132, Natl. Ctr. for Toxicological Res., 3900 NCTR Drive, Jefferson, AR 72079-9502, United States	Binienda, Z., Neurophysiology Laboratory, Division of Neurotoxicology, Natl. Ctr. for Toxicological Res., Jefferson, AR 72079, United States, Division of Neurotoxicology, HFT-132, Natl. Ctr. for Toxicological Res., 3900 NCTR Drive, Jefferson, AR 72079-9502, United States; Virmani, A., Scientific Affairs, R and D, Sigma-Tau Health Science s.p.a., Via Treviso 4, 00040 Pomezia, Roma, Italy		3 nitropropionic acid; carnitine; levacecarnine; methamphetamine; tricarboxylic acid; Alzheimer disease; brain mitochondrion; cell membrane steady potential; central nervous system; electron transport; energy yield; fatty acid oxidation; human; Huntington chorea; mitochondrial respiration; multiple sclerosis; neuroprotection; nonhuman; Parkinson disease; review; stereoisomerism
Boussicault F., Robert M.	Review	2008	Electron transfer in DNA and in DNA-related biological processes. Electrochemical insights	The electrochemical reduction and oxidation of DNA bases and constituents, particularly the understanding of excess electron transfer through DNA and of proton-controlled electron transfer aspects of base oxidation have been reviewed. Included in the review are the charge transfer processes through oligonucleotides and DNA duplexes assembled onto electrodes, a field within which the contribution …	1	1	English		Scopus	Chemical Reviews	108	7		2622	2645		10.1021/cr0680787	https://www.scopus.com/inward/record.uri?eid=2-s2.0-49049118082&doi=10.1021%2fcr0680787&partnerID=40&md5=dff2a4e382f827461f8cf45a91f9151a	Laboratoire d'Electrochimie Moléculaire, Unité Mixte de Recherche Université - CNRS 7591, Université Paris Diderot, 2 place Jussieu, 75251 Paris Cedex 05, France	Boussicault, F., Laboratoire d'Electrochimie Moléculaire, Unité Mixte de Recherche Université - CNRS 7591, Université Paris Diderot, 2 place Jussieu, 75251 Paris Cedex 05, France; Robert, M., Laboratoire d'Electrochimie Moléculaire, Unité Mixte de Recherche Université - CNRS 7591, Université Paris Diderot, 2 place Jussieu, 75251 Paris Cedex 05, France		Catalysts; Charge transfer; Chemical oxygen demand; Electrolytic reduction; Electron transitions; Electrons; Enzymes; Genes; Ion exchange; Mass transfer; Nucleic acids; Oligonucleotides; Organic acids; Oxidation; Proteins; Proton transfer; Biological processing; Charge transfer processes; DNA bases; DNA duplexes; DNA lesions; Electrochemical reductions; Electron transfer; Glycosylase enzymes; Pho…
Bradbury M.W.B.	Review	1997	Transport of iron in the blood-brain-cerebrospinal fluid system	Iron is an important constituent in brain and, in certain regions, e.g., the basal nuclei, reaches concentrations equivalent to those in liver. It has a role in electron transfer and is a cofactor for certain enzymes, including those involved in catecholamine and myelin synthesis. Iron in CSF is likely to be representative of that in interstitial fluid of brain. Transferrin in CSF is fully satura…	2	1	English	EC, DNA, PD, no STM	Scopus	Journal of Neurochemistry	69	2		443	454		10.1046/j.1471-4159.1997.69020443.x	https://www.scopus.com/inward/record.uri?eid=2-s2.0-0030739637&doi=10.1046%2fj.1471-4159.1997.69020443.x&partnerID=40&md5=4c8a66cd41dcdfaf3331e8d0ab8f73d6	Division of Biomedical Sciences, King's College London, London, United Kingdom; Division of Biomedical Sciences, King's College London, Strand, London WC2R 2LS, United Kingdom	Bradbury, M.W.B., Division of Biomedical Sciences, King's College London, London, United Kingdom, Division of Biomedical Sciences, King's College London, Strand, London WC2R 2LS, United Kingdom	Blood-brain barrier; Cerebrospinal fluid; Iron; Iron transport; Transferrin; Transferrin receptors	ascorbic acid; ferric chloride; ferritin; iodine 125; iron; iron 59; transferrin; transferrin receptor; binding site; blood brain barrier; brain blood vessel; cerebrospinal fluid; controlled study; endocytosis; female; glia cell; human; iron transport; male; membrane transport; mouse; nerve cell; neuropathology; nonhuman; Parkinson disease; priority journal; rat; review; vascular endothelium; Ara…
Buscemi S., Pace A., Piccionello A.P., Pibiri I., Vivona N.	Article	2004	Fluorinated heterocyclic compounds. A photochemical approach to a synthesis of fluorinated quinazolin-4-ones	An efficient and generalized photochemical methodology for the preparation of fluorinated quinazolin-4-ones is described. Depending on the starting substrate, quinazolin-4-ones bearing a perfluoroalkyl- or perfluoroaryl- substituent in position 2 or fluorine atoms on any positions of the benzo-fused moiety can easily be obtained. 5-Aryl-3-perfluoroalkylpentafluorophenyl- or 5-polyfluoroaryl-3-phe…	0	1	English	photoinduced electron transfer process	Scopus	Heterocycles	63	7		1619	1628		10.3987/COM-04-10059	https://www.scopus.com/inward/record.uri?eid=2-s2.0-3142557698&doi=10.3987%2fCOM-04-10059&partnerID=40&md5=e1257905c99f699304cc8501d383fcfe	Dipto. di Chim. Organica E. Paterno, Universita degli Studi di Palermo, Viale Scienze-Parco d'Orleans II, I-90128, Palermo, Italy	Buscemi, S., Dipto. di Chim. Organica E. Paterno, Universita degli Studi di Palermo, Viale Scienze-Parco d'Orleans II, I-90128, Palermo, Italy; Pace, A., Dipto. di Chim. Organica E. Paterno, Universita degli Studi di Palermo, Viale Scienze-Parco d'Orleans II, I-90128, Palermo, Italy; Piccionello, A.P., Dipto. di Chim. Organica E. Paterno, Universita degli Studi di Palermo, Viale Scienze-Parco d'O…		1,2,4 oxadiazole derivative; acetonitrile; fluorine; heterocyclic compound; methanol; pyrene; quinazolinone derivative; triethylamine; anticonvulsant activity; antiinflammatory activity; antimicrobial activity; antineoplastic activity; article; chromatography; cyclization; drug synthesis; electron transport; fluorescence spectroscopy; fluorination; infrared spectroscopy; mass spectrometry; Parkin…
Camargo A.F., Chioda M.M., Rodrigues A.P.C., Garcia G.S., McKinney E.A., Jacobs H.T., Oliveira M.T.	Review	2018	Xenotopic expression of alternative electron transport enzymes in animal mitochondria and their impact in health and disease	The mitochondrial respiratory chain in vertebrates and arthropods is different from that of most other eukaryotes because they lack alternative enzymes that provide electron transfer pathways additional to the oxidative phosphorylation (OXPHOS) system. However, the use of diverse experimental models, such as human cells in culture, Drosophila melanogaster and the mouse, has demonstrated that the …	1	1	English		Scopus	Cell Biology International	42	6		664	669		10.1002/cbin.10943	https://www.scopus.com/inward/record.uri?eid=2-s2.0-85042353495&doi=10.1002%2fcbin.10943&partnerID=40&md5=7ce6e2580cdb6eff84d4e2bee6be2ad7	Departamento de Tecnologia, Faculdade de Ciências Agrárias e Veterinárias, Universidade Estadual Paulista “Júlio de Mesquita Filho”, Via de Acesso Prof. Paulo Donato Castellane, s/n, Jaboticabal, SP 14884-900, Brazil; Institute of Biosciences and Medical Technology and Tampere University Hospital, University of Tampere, Tampere, FI-33014, Finland; Institute of Biotechnology, University of Helsink…	Camargo, A.F., Departamento de Tecnologia, Faculdade de Ciências Agrárias e Veterinárias, Universidade Estadual Paulista “Júlio de Mesquita Filho”, Via de Acesso Prof. Paulo Donato Castellane, s/n, Jaboticabal, SP 14884-900, Brazil; Chioda, M.M., Departamento de Tecnologia, Faculdade de Ciências Agrárias e Veterinárias, Universidade Estadual Paulista “Júlio de Mesquita Filho”, Via de Acesso Prof.…	animal models; mitochondrial disorders; reactive oxygen species; respiratory chain	adenosine triphosphate; alternative oxidase; cytochrome c oxidase; mitochondrial DNA; oxidoreductase; reactive oxygen metabolite; reduced nicotinamide adenine dinucleotide dehydrogenase; reduced nicotinamide adenine dinucleotide dehydrogenase (ubiquinone); ubiquinol cytochrome c reductase; unclassified drug; adenine nucleotide translocase; multienzyme complex; reactive oxygen metabolite; reduced …
Carreras, Marı́a C Franco, Marı́a C Peralta, Jorge G Poderoso, Juan J	Review	2004	Nitric oxide, complex I, and the modulation of mitochondrial reactive species in biology and disease	Mitochondria are the specialized organelles for energy metabolism but also participate in the production of O2 active species, cell cycle regulation, apoptosis and thermogenesis. Classically, regulation of mitochondrial energy functions was based on the ADP/ATP ratio, which dynamically stimulates the transition between resting and maximal O2 uptake. However, in the last years, NO was identified a…	1	1	English	biochemistry, pathogenesis	Sciencedirect	Molecular Aspects of Medicine	25	1		125-139			https://doi.org/10.1016/j.mam.2004.02.014	https://www.sciencedirect.com/science/article/pii/S0098299704000159			Cancer Complex I Mitochondriopathies Nitric oxide Parkinson's disease Sepsis mtNOS pathology mtNOS physiology
Chatterjee S., Ghosh S., Mishra S., Das Saha K., Banerji B., Chattopadhyay K.	Article	2019	Efficient Detection of Early Events of α-Synuclein Aggregation Using a Cysteine Specific Hybrid Scaffold	In this study, we have designed and synthesized a new hybrid ligand (SCG) that can selectively detect cysteine in the free and protein-bound states within minutes at the subnanomolar level. Photoinduced electron transfer was responsible for the visible color change as well as a large increase in steady state fluorescence. This detection was validated by using multiple model protein systems with d…	1	1	English		Scopus	Biochemistry	58	8		1109	1119		10.1021/acs.biochem.8b01161	https://www.scopus.com/inward/record.uri?eid=2-s2.0-85061501786&doi=10.1021%2facs.biochem.8b01161&partnerID=40&md5=046c35a09b2c6966e206e75450195130	Organic and Medicinal Chemistry Division, Indian Institute of Chemical Biology (CSIR-IICB), Kolkata, 700032, India; Academy of Scientific and Innovative Research (AcSIR), 4 Raja S. C. Mullick Road, Kolkata, 700032, India; Structural Biology and Bioinformatics Division, Indian Institute of Chemical Biology (CSIR-IICB), 4 Raja S. C. Mullick Road, Kolkata, 700032, India; Cancer Biology and Inflammat…	Chatterjee, S., Organic and Medicinal Chemistry Division, Indian Institute of Chemical Biology (CSIR-IICB), Kolkata, 700032, India; Ghosh, S., Structural Biology and Bioinformatics Division, Indian Institute of Chemical Biology (CSIR-IICB), 4 Raja S. C. Mullick Road, Kolkata, 700032, India; Mishra, S., Cancer Biology and Inflammatory Disorder Division, Indian Institute of Chemical Biology (CSIR-I…		Amino acids; Isomers; Proteins; Conformational fluctuations; Oligomer formations; Parkinson's disease; Photo-induced electron transfer; Spatial arrangements; Steady state fluorescences; Subnanomolar levels; Visible color changes; Biosynthesis; alpha synuclein; cysteine; alpha synuclein; cysteine; fluorescent dye; SNCA protein, human; Article; controlled study; electron transport; fluorescence; hu…
Chen J., Liu Q., Wang Y., Guo Y., Xu X., Huang P., Lian B., Zhang R., Chen Y., Ha Y.	Article	2021	Protective effects of resveratrol liposomes on mitochondria in substantia nigra cells of parkinsonized rats	Background: Parkinson’s disease (PD) is a central nervous system degenerative disease. The progressive death of dopaminergic neurons is closely correlated to mitochondrial dysfunction. Resveratrol contains three hydroxyl groups, and has a strong neuroprotective effect. This study aimed to investigate the protective effect of resveratrol liposome on mitochondria of substantia nigra cells in Parkin…	0	1	English	EC, DNA, PD, no STM	Scopus	Annals of Palliative Medicine	10	3		2458	2468		10.21037/apm-19-426	https://www.scopus.com/inward/record.uri?eid=2-s2.0-85103286685&doi=10.21037%2fapm-19-426&partnerID=40&md5=841556fbc7f3232af1d00e347fc79e10	Beijing Hospital of Traditional Chinese Medicine, Capital Medical University, Beijing, China; College of Clinic Medicine, Hubei University of Chinese Medicine, Wuhan, China	Chen, J., Beijing Hospital of Traditional Chinese Medicine, Capital Medical University, Beijing, China; Liu, Q., Beijing Hospital of Traditional Chinese Medicine, Capital Medical University, Beijing, China; Wang, Y., College of Clinic Medicine, Hubei University of Chinese Medicine, Wuhan, China; Guo, Y., Beijing Hospital of Traditional Chinese Medicine, Capital Medical University, Beijing, China;…	Liposomes; Mitochondria; Parkinson’s disease; Rat model; Resveratrol
Chicherin I.V., Baleva M.V., Levitskii S.A., Dashinimaev E.B., Krasheninnikov I.A.	Review	2019	Mitochondrial Translation Initiation Factor 3: Structure, Functions, Interactions, and Implication in Human Health and Disease	Mitochondria are essential organelles of eukaryotic cell that provide its respiratory function by means of the electron transfer chain. Expression of mitochondrial genes is organized in a bacterial-like manner; however multiple evolutionary differences are observed between the two systems, including translation initiation machinery. This review is dedicated to the mitochondrial translation initia…	0	1	English	EC, DNA, PD, no STM	Scopus	Biochemistry (Moscow)	84	10		1143	1150		10.1134/S0006297919100031	https://www.scopus.com/inward/record.uri?eid=2-s2.0-85073461346&doi=10.1134%2fS0006297919100031&partnerID=40&md5=c81369b6dafe235f84753631779d2cf5	Faculty of Biology, Lomonosov Moscow State University, Moscow, 119234, Russian Federation; Institute of Functional Genomics, Lomonosov Moscow State University, Moscow, 119234, Russian Federation; Koltzov Institute of Developmental Biology, Russian Academy of Sciences, Moscow, 119334, Russian Federation; Pirogov Russian National Research Medical University, Moscow, 117977, Russian Federation	Chicherin, I.V., Faculty of Biology, Lomonosov Moscow State University, Moscow, 119234, Russian Federation, Institute of Functional Genomics, Lomonosov Moscow State University, Moscow, 119234, Russian Federation; Baleva, M.V., Faculty of Biology, Lomonosov Moscow State University, Moscow, 119234, Russian Federation; Levitskii, S.A., Faculty of Biology, Lomonosov Moscow State University, Moscow, 1…	IF3mt; mitochondria; Parkinson’s disease; ribosome; translation	initiation factor; mitochondrial protein; MTIF3 protein, human; chemistry; human; metabolism; mitochondrion; Parkinson disease; Eukaryotic Initiation Factors; Humans; Mitochondria; Mitochondrial Proteins; Parkinson Disease
Cramer W.A., Zakharov S.D., Saif Hasan S., Zhang H., Baniulis D., Zhalnina M.V., Soriano G.M., Sharma O., Rochet J.C., Ryan C., Whitelegge J., Kurisu G., Yamashita E.	Article	2011	Membrane proteins in four acts: Function precedes structure determination	Studies on four membrane protein systems, which combine information derived from crystal structures and biophysical studies have emphasized, as a precursor to crystallization, demonstration of functional activity. These assays have relied on sensitive spectrophotometric, electrophysiological, and microbiological assays of activity to select purification procedures that lead to functional complexe…	0	1	English	EC, no DNA, PD, no STM	Scopus	Methods	55	4		415	420		10.1016/j.ymeth.2011.11.001	https://www.scopus.com/inward/record.uri?eid=2-s2.0-84856014195&doi=10.1016%2fj.ymeth.2011.11.001&partnerID=40&md5=85b31f9544db85a1550a095699ee81d2	Department of Biological Sciences, Purdue University, Hall of Structural Biology, 240 Hockmeyer Hall, West Lafayette, IN 47907-1354, United States; Institute for Protein Research, Department of Macromolecular Science, Osaka University, Yamada-oka Suita 565-0871, Japan; Aptuit Inc., 3065 Kent Avenue, West Lafayette, IN 47906, United States; Institute of Horticulture, Lithuanian Research Centre for…	Cramer, W.A., Department of Biological Sciences, Purdue University, Hall of Structural Biology, 240 Hockmeyer Hall, West Lafayette, IN 47907-1354, United States; Zakharov, S.D., Department of Biological Sciences, Purdue University, Hall of Structural Biology, 240 Hockmeyer Hall, West Lafayette, IN 47907-1354, United States, Institute of Basic Problems of Biology, Russian Academy of Science, Pushc…	α-Synuclein; BtuB; Cytochrome b 6f; NAD(P)H dehydrogenase (NDH-1); OmpF	alpha synuclein; btuB protein; colicin e2; colicin e3; cyanocobalamin binding protein; cytochrome b6f; lipid; membrane protein; outer membrane protein; outer membrane protein F; porin; proteinase; reduced nicotinamide adenine dinucleotide phosphate; unclassified drug; voltage gated potassium channel; voltage gated sodium channel; amino terminal sequence; article; bacterial strain; chromatography;…
Dagani F., Ferrari R., Anderson J.J., Chase T.N.	Article	1991	L‐dopa does not affect electron transfer chain enzymes and respiration of rat muscle mitochondria	Alterations in mitochondrial respiratory chain enzymes have been found in skeletal muscle of parkinsonian patients. Most of these patients had received treatment with L‐dopa in combination with an inhibitor of peripheral decarboxylase for several years. In order to determine whether these effects are only dependent on the disease or are partially due to its therapy, the effects of L‐dopa methyl e…	2	0	English		Scopus	Movement Disorders	6	4		315	319		10.1002/mds.870060408	https://www.scopus.com/inward/record.uri?eid=2-s2.0-0026049173&doi=10.1002%2fmds.870060408&partnerID=40&md5=a18caafb51a26312acdb269a1988cf33	Istituto di Farmacologia, Facoltà di Scienze Mm.Ff.Nn, University of Pavia, Italy; Experimental Therapeutics Branch, National Institute of Neurological Disorders and Stroke, Bethesda, Maryland, United States; Istituto di Farmacologia, Facoltà di Scienze Mm.Ff.Nn, Università di Pavia, Piazza Botta 11, Pavia, 27100, Italy	Dagani, F., Istituto di Farmacologia, Facoltà di Scienze Mm.Ff.Nn, University of Pavia, Italy, Istituto di Farmacologia, Facoltà di Scienze Mm.Ff.Nn, Università di Pavia, Piazza Botta 11, Pavia, 27100, Italy; Ferrari, R., Istituto di Farmacologia, Facoltà di Scienze Mm.Ff.Nn, University of Pavia, Italy; Anderson, J.J., Experimental Therapeutics Branch, National Institute of Neurological Disorders…	Enzyme activities; L‐dopa; Respiration; Skeletal muscle mitochondria	benserazide; levodopa; reduced nicotinamide adenine dinucleotide dehydrogenase; aged; animal tissue; article; controlled study; male; mitochondrion; muscle; nonhuman; parkinson disease; rat; spectroscopy; subcutaneous drug administration; Animal; Cytochrome-c Oxidase; Dose-Response Relationship, Drug; Electron Transport; Energy Metabolism; Glutamate Dehydrogenase; Levodopa; Male; Mitochondria, Mu…
Dangi V., Baral M., Kanungo B.K.	Article	2020	Study on the development of a cyclohexane based tripodal molecular device as "off-on-off" ph sensor and fluorescent iron sensor	Background: Iron is an essential transition metal which is indispensable for life processes like oxygen transport and metabolism, electron transfer etc. However, misregulated iron is responsible for disease like anemia, hemochromatosis, Alzheimer’s and Parkinson’s disease. In order to encounter these diseases, a better understanding is needed of its role in misregulation. Fluorescent iron sensors…	0	0	English		Scopus	Current Analytical Chemistry	16	5		620	630		10.2174/1573411015666190314154126	https://www.scopus.com/inward/record.uri?eid=2-s2.0-85087365756&doi=10.2174%2f1573411015666190314154126&partnerID=40&md5=06ca08e1eb1f38d2bb06453d3543201d	Department of Chemistry, National Institute of Technology, Kurukshetra, Haryana 136119, India; Department of Chemistry, Sant Longowal Institute of Engineering & Technology, Longowal, 148106, India	Dangi, V., Department of Chemistry, National Institute of Technology, Kurukshetra, Haryana 136119, India; Baral, M., Department of Chemistry, National Institute of Technology, Kurukshetra, Haryana 136119, India; Kanungo, B.K., Department of Chemistry, Sant Longowal Institute of Engineering & Technology, Longowal, 148106, India	DFT; OFF-ON-OFF; PET; Sensor; Tripodal; ZINDO
Diaz-Diestra, Daysi Thapa, Bibek Beltran-Huarac, Juan Weiner, Brad R Morell, Gerardo	Article	2017	L-cysteine capped ZnS:Mn quantum dots for room-temperature detection of dopamine with high sensitivity and selectivity	Dopamine (DA) is one of the most important catecholamine neurotransmitters of the human central nervous system, and is involved in many behavioral responses and brain functions. Below normal DA levels in biological fluids can lead to different neurodegenerative conditions. For excess DA levels, a failure in energy metabolism is indicated. In this study, a facile room-temperature phosphorescence s…	1	1	English	biochemistry, DA sensor	Sciencedirect	Biosensors and Bioelectronics	87			693-700			https://doi.org/10.1016/j.bios.2016.09.022	https://www.sciencedirect.com/science/article/pii/S0956566316308946			Dopamine Mn-doped ZnS Quantum dots
Ďuračková Z.	Review	2010	Some current insights into oxidative stress	Oxidative stress is a phenomenon associated with pathogenetic mechanisms of several diseases including atherosclerosis, neurodegenerative diseases, such as Alzheimer's and Parkinson's disease, cancer, diabetes mellitus, inflammatory diseases, as well as psychological diseases or aging processes. Oxidative stress is defined as an imbalance between production of free radicals and reactive metabolit…	0	1	English	EC, DNA, PD, no STM	Scopus	Physiological Research	59	4		459	469			https://www.scopus.com/inward/record.uri?eid=2-s2.0-77958114712&partnerID=40&md5=47a2dd477f70585101f0f17e687a916b	Institute of Medical Chemistry, Biochemistry and Clinical Biochemistry, Faculty of Medicine, Comenius University, Bratislava, Slovakia	Ďuračková, Z., Institute of Medical Chemistry, Biochemistry and Clinical Biochemistry, Faculty of Medicine, Comenius University, Bratislava, Slovakia	Antioxidants; Oxidative stress; Reactive metabolites; Redox stress; Signaling	antioxidant; reactive oxygen metabolite; animal; homeostasis; human; metabolism; oxidation reduction reaction; oxidative stress; review; signal transduction; Animals; Antioxidants; Homeostasis; Humans; Oxidation-Reduction; Oxidative Stress; Reactive Oxygen Species; Signal Transduction
Ehlich R., Hörber J.K.H.	Article	2009	Molecular order affecting electron transport through ssDNA	DNA is considered to be the ideal model for studies of electron transport in molecule/conductor systems due to its stability, easily controlled structure and the presumed electrical properties. Scanning tunnelling microscope (STM) studies of single-stranded DNA bound to Au (1 1 1) or Au nanodots with a thiol linker were carried out under ambient conditions. The results show that the electron tran…	1	1	English		Scopus	Ultramicroscopy	109	8		1074	1079		10.1016/j.ultramic.2009.03.044	https://www.scopus.com/inward/record.uri?eid=2-s2.0-67449161562&doi=10.1016%2fj.ultramic.2009.03.044&partnerID=40&md5=7f211dfdf2c5c5637e59d4ade0d609d1	H.H. Wills Physics Laboratory, University of Bristol, Bristol, BS8 1TL, United Kingdom	Ehlich, R., H.H. Wills Physics Laboratory, University of Bristol, Bristol, BS8 1TL, United Kingdom; Hörber, J.K.H., H.H. Wills Physics Laboratory, University of Bristol, Bristol, BS8 1TL, United Kingdom	DNA; Gold dot; STM; Titanium oxide	Ambient conditions; Au(1 1 1 ); Controlled structures; Crystalline surfaces; DNA strands; Effective charge; Electrical property; Electron transfer; Electron transport; Gold dot; Ideal model; Light energy; Molecular orders; Nanodots; Parallel arrangement; Photovoltaic devices; Scanning tunnelling microscopes; Serial resistance; Single-stranded DNA; STM; Thiol linkers; Water film; DNA; Electric pro…
Fato R; Bergamini C; Leoni S; Strocchi P; Lenaz G	Review	2008	Generation of reactive oxygen species by mitochondrial complex I: implications in neurodegeneration.	Mitochondrial Complex I [NADH Coenzyme Q (CoQ) oxidoreductase] is the least understood of respiratory complexes. In this review we emphasize some novel findings on this enzyme that are of relevance to the pathogenesis of neurodegenerative diseases. Besides CoQ, also oxygen may be an electron acceptor from the enzyme, with generation of superoxide radical in the mitochondrial matrix. The site of s…	1	1	English		EBSCOhost MEDLINE	Neurochemical research	33	12		2487			10.1007/s11064-008-9747-0				Electron Transport Complex I metabolism; Neurodegenerative Diseases metabolism; Reactive Oxygen Species metabolism; Electron Transport Complex I chemistry; Humans; Neurodegenerative Diseases enzymology
Feng P., Chen Y., Zhang L., Qian C.-G., Xiao X., Han X., Shen Q.-D.	Article	2018	Near-Infrared Fluorescent Nanoprobes for Revealing the Role of Dopamine in Drug Addiction	Brain imaging techniques enable visualizing the activity of central nervous system without invasive neurosurgery. Dopamine is an important neurotransmitter. Its fluctuation in brain leads to a wide range of diseases and disorders, like drug addiction, depression, and Parkinson's disease. We designed near-infrared fluorescence dopamine-responsive nanoprobes (DRNs) for brain activity imaging during…	0	1	English	EC, DNA, PD, no STM	Scopus	ACS Applied Materials and Interfaces	10	5		4359	4368		10.1021/acsami.7b12005	https://www.scopus.com/inward/record.uri?eid=2-s2.0-85041917190&doi=10.1021%2facsami.7b12005&partnerID=40&md5=7de1bbec6df6e78ac4683432949984c5	Department of Polymer Science and Engineering, Key Laboratory of High Performance Polymer Materials and Technology of MOE, Collaborative Innovation Center of Chemistry for Life Sciences, School of Chemistry and Chemical Engineering, Nanjing University, Nanjing, 210023, China; Department of Biomedical Engineering, College of Engineering and Applied Science, Nanjing University, Nanjing, 210093, Chi…	Feng, P., Department of Polymer Science and Engineering, Key Laboratory of High Performance Polymer Materials and Technology of MOE, Collaborative Innovation Center of Chemistry for Life Sciences, School of Chemistry and Chemical Engineering, Nanjing University, Nanjing, 210023, China; Chen, Y., Department of Polymer Science and Engineering, Key Laboratory of High Performance Polymer Materials an…	brain activity; dopamine-responsive; drug addiction; functional neuroimaging; near-infrared fluorescence	Amines; Brain mapping; Fluorescence imaging; Functional neuroimaging; Infrared devices; Mammals; Nanoprobes; Neurons; Neurosurgery; Physiological models; Brain activity; Brain imaging techniques; dopamine-responsive; Drug addiction; Light-induced electron transfer; Near-infrared fluorescence; Near-infrared fluorescent; Physiological environment; Brain; dopamine; nanomaterial; animal; brain; dopam…
Feng T., Ji W., Zhang Y., Wu F., Tang Q., Wei H., Mao L., Zhang M.	Article	2020	Zwitterionic Polydopamine Engineered Interface for In Vivo Sensing with High Biocompatibility	Electrochemical sensing performance is often compromised by electrode biofouling (e.g., proteins nonspecific binding) in complex biological fluids; however, the design and construction of a robust biointerface remains a great challenge. Herein, inspired by nature, we demonstrate a robust polydopamine-engineered biointerfacing, to tailing zwitterionic molecules (i.e., sulfobetaine methacrylate, SB…	2	0	English		Scopus	Angewandte Chemie - International Edition	59	52		23445	23449		10.1002/anie.202010675	https://www.scopus.com/inward/record.uri?eid=2-s2.0-85093686441&doi=10.1002%2fanie.202010675&partnerID=40&md5=46e433e5428c335a5ef64661954630e5	Department of Chemistry, Renmin University of China, Beijing, 100872, China; Beijing National Laboratory for Molecular Sciences, Key Laboratory of Analytical Chemistry for Living Biosystems, Institute of Chemistry, Chinese Academy of Sciences (CAS), Beijing, 100190, China	Feng, T., Department of Chemistry, Renmin University of China, Beijing, 100872, China; Ji, W., Department of Chemistry, Renmin University of China, Beijing, 100872, China; Zhang, Y., Department of Chemistry, Renmin University of China, Beijing, 100872, China; Wu, F., Beijing National Laboratory for Molecular Sciences, Key Laboratory of Analytical Chemistry for Living Biosystems, Institute of Chem…	acute neuroinflammatory response; antifouling; biointerfacing; in vivo analysis; polydopamine	Addition reactions; Biocompatibility; Brain; Electron transport properties; Proteins; Tissue; Design and construction; Electrochemical sensing; Electrochemical stabilities; Engineered interfaces; Implantable electrodes; Interfacial electron transfer; Non-specific binding; Zwitter ionic molecule; Electrochemical electrodes; amino acid transporter; indole derivative; polydopamine; polymer; animal; …
Feng Y., Li W., Li J., Wang J., Ge J., Xu D., Liu Y., Wu K., Zeng Q., Wu J.-W., Tian C., Zhou B., Yang M.	Article	2012	Structural insight into the type-II mitochondrial NADH dehydrogenases	The single-component type-II NADH dehydrogenases (NDH-2s) serve as alternatives to the multisubunit respiratory complexa €‰I (type-I NADH dehydrogenase (NDH-1), also called NADH:ubiquinone oxidoreductase; EC 1.6.5.3) in catalysing electron transfer from NADH to ubiquinone in the mitochondrial respiratory chain. The yeast NDH-2 (Ndi1) oxidizes NADH on the matrix side and reduces ubiquinone to main…	0	0	English		Scopus	Nature	491	7424		478	482		10.1038/nature11541	https://www.scopus.com/inward/record.uri?eid=2-s2.0-84869083929&doi=10.1038%2fnature11541&partnerID=40&md5=4ae471ecf1cbbc70f6c382328f68c23a	Tsinghua-Peking Center for Life Sciences, School of Life Sciences, Tsinghua University, Beijing 100084, China; State Key Laboratory of Systematic and Evolutionary Botany, Institute of Botany, Chinese Academy of Sciences, Beijing 100093, China; Hefei National Laboratory for Physical Sciences at Microscale, School of Life Sciences, University of Science and Technology of China, Hefei, Anhui 230026,…	Feng, Y., Tsinghua-Peking Center for Life Sciences, School of Life Sciences, Tsinghua University, Beijing 100084, China; Li, W., Tsinghua-Peking Center for Life Sciences, School of Life Sciences, Tsinghua University, Beijing 100084, China; Li, J., Tsinghua-Peking Center for Life Sciences, School of Life Sciences, Tsinghua University, Beijing 100084, China; Wang, J., Tsinghua-Peking Center for Lif…		flavine adenine nucleotide; fungal enzyme; mitochondrial enzyme; oxidoreductase; reduced nicotinamide adenine dinucleotide phosphate dehydrogenase; ubiquinone; catalysis; crystal structure; disease control; electron; enzyme activity; mitochondrion; pathogen; protein; public health; substrate; article; binding site; catalysis; crystal structure; electron transport; enzyme substrate; nonhuman; prio…
Forman C.J., Wang N., Yang Z.Y., Mowat C.G., Jarvis S., Durkan C., Barker P.D.	Article	2013	Probing the location of displayed cytochrome b562 on amyloid by scanning tunnelling microscopy	Amyloid fibres displaying cytochrome b562 were probed using scanning tunnelling microscopy (STM) in vacuo. The cytochromes are electron transfer proteins containing a haem cofactor and could, in principle, mediate electron transfer between the tip and the gold substrate. If the core fibres were insulating and electron transfer within the 3D haem network was detected, then the electron transport p…	2	1	English	EC,DNA, STM, not related to PD	Scopus	Nanotechnology	24	17	175102				10.1088/0957-4484/24/17/175102	https://www.scopus.com/inward/record.uri?eid=2-s2.0-84876143537&doi=10.1088%2f0957-4484%2f24%2f17%2f175102&partnerID=40&md5=e9e41914dc4014f575e34f786676c3fd	Department of Chemistry, University of Cambridge, Lensfield Road, Cambridge CB2 1EW, United Kingdom; Nanoscience, University of Cambridge, 11 JJ Thomson Avenue, Cambridge CB3 0FF, United Kingdom; School of Chemistry and Engineering, Chinese Academy of Sciences, 19A Yuquanlu, Shijingshang District, Beijing, China; EaStCHEM School of Chemistry, University of Edinburgh, West Mains Road, Edinburgh EH…	Forman, C.J., Department of Chemistry, University of Cambridge, Lensfield Road, Cambridge CB2 1EW, United Kingdom; Wang, N., Nanoscience, University of Cambridge, 11 JJ Thomson Avenue, Cambridge CB3 0FF, United Kingdom; Yang, Z.Y., School of Chemistry and Engineering, Chinese Academy of Sciences, 19A Yuquanlu, Shijingshang District, Beijing, China; Mowat, C.G., EaStCHEM School of Chemistry, Unive…		Conducting structure; Conduction Mechanism; Electron transfer; Electron transfer proteins; Gold substrates; Low conductivity; Mediated electron transfer; Tunnelling current; Electron transitions; Electron transport properties; Genetic engineering; Glycoproteins; Gold; Scanning tunneling microscopy; Fibers; amyloid; cytochrome b; cytochrome c; article; chemical structure; chemistry; electric condu…
Galano A., Tan D.X., Reiter R.J.	Review	2011	Melatonin as a natural ally against oxidative stress: A physicochemical examination	Abstract: Oxidative stress has been proven to be related to the onset of a large number of health disorders. This chemical stress is triggered by an excess of free radicals, which are generated in cells because of a wide variety of exogenous and endogenous processes. Therefore, finding strategies for efficiently detoxifying free radicals has become a subject of a great interest, from both an acad…	0	0	English		Scopus	Journal of Pineal Research	51	1		1	16		10.1111/j.1600-079X.2011.00916.x	https://www.scopus.com/inward/record.uri?eid=2-s2.0-79960380554&doi=10.1111%2fj.1600-079X.2011.00916.x&partnerID=40&md5=d4d57bdb9c83c329b29f358ae6e4e420	Departamento de Química, Universidad Autõnoma Metropolitana-Iztapalapa, San Rafael Atlixco 186, Col. Vicentina, Iztapalapa. 0934 México D. F., Mexico; Department of Cellular and Structural Biology, UT Health Science Center, San Antonio, TX, United States	Galano, A., Departamento de Química, Universidad Autõnoma Metropolitana-Iztapalapa, San Rafael Atlixco 186, Col. Vicentina, Iztapalapa. 0934 México D. F., Mexico; Tan, D.X., Department of Cellular and Structural Biology, UT Health Science Center, San Antonio, TX, United States; Reiter, R.J., Department of Cellular and Structural Biology, UT Health Science Center, San Antonio, TX, United States	electron transfer; free radicals; hydrogen transfer; kinetics; mechanism; scavenger	dopamine; free radical; glutathione; hydrogen; melatonin; reactive oxygen metabolite; scavenger; tryptophan; Alzheimer disease; antioxidant activity; aqueous solution; cell transport; central nervous system; chemical bond; circadian rhythm; disease course; DNA damage; electron transport; hormone metabolism; in vivo study; ionizing radiation; kinetics; light dark cycle; lipid peroxidation; lipophi…
Goode-Romero G., Winnberg U., Domínguez L., Ibarra I.A., Vargas R., Winnberg E., Martínez A.	Article	2020	New information of dopaminergic agents based on quantum chemistry calculations	Dopamine is an important neurotransmitter that plays a key role in a wide range of both locomotive and cognitive functions in humans. Disturbances on the dopaminergic system cause, among others, psychosis, Parkinson’s disease and Huntington’s disease. Antipsychotics are drugs that interact primarily with the dopamine receptors and are thus important for the control of psychosis and related disord…	2	1	English	EC, PD, no STM, not related to DNA	Scopus	Scientific Reports	10	1	21581				10.1038/s41598-020-78446-4	https://www.scopus.com/inward/record.uri?eid=2-s2.0-85097378500&doi=10.1038%2fs41598-020-78446-4&partnerID=40&md5=0a7d545bd1388beb18c7d6b1e8df997a	Departamento de Fisicoquímica, Facultad de Química, Universidad Nacional Autónoma de México, Circuito Exterior SN, Ciudad Universitaria, Ciudad de México, CDMX CP 04510, Mexico; Departamento Académico de Ingeniería Industrial y Operaciones, Instituto Tecnológico Autónomo de México, Río, Hondo 1, Altavista, Álvaro Obregón, Ciudad de México, CDMX CP 01080, Mexico; Laboratorio de Fisicoquímica y Rea…	Goode-Romero, G., Departamento de Fisicoquímica, Facultad de Química, Universidad Nacional Autónoma de México, Circuito Exterior SN, Ciudad Universitaria, Ciudad de México, CDMX CP 04510, Mexico; Winnberg, U., Departamento Académico de Ingeniería Industrial y Operaciones, Instituto Tecnológico Autónomo de México, Río, Hondo 1, Altavista, Álvaro Obregón, Ciudad de México, CDMX CP 01080, Mexico; Do…
Goodman S.M., Singh V., Ribot J.C., Chatterjee A., Nagpal P.	Article	2014	Multiple energy exciton shelves in quantum-dot-DNA nanobioelectronics	Quantum dots (QDs) are semiconductor nanocrystallites with multiple size-dependent quantum-confined states that are being explored for utilizing broadband radiation. While DNA has been used for the self-assembly of nanocrystals, it has not been investigated for the formation of simultaneous conduction pathways for transporting multiple energy charges or excitons. These exciton shelves can be form…	2	1	English	EC, DNA, STM, not related to PD	Scopus	Journal of Physical Chemistry Letters	5	21		3909	3913		10.1021/jz502058y	https://www.scopus.com/inward/record.uri?eid=2-s2.0-84908621681&doi=10.1021%2fjz502058y&partnerID=40&md5=488bc52fd2b1994ce0f6006f99acc4bb	Department of Chemical and Biological Engineering, University of Colorado, Boulder, Boulder, CO 80303, United States; Materials Science and Engineering, University of Colorado, Boulder, 3415 Colorado Avenue, Boulder, CO 80303, United States; Renewable and Sustainable Energy Institute, University of Colorado, Boulder, 2445 Kittredge Loop Road, Suite 208, Boulder, CO 80309, United States	Goodman, S.M., Department of Chemical and Biological Engineering, University of Colorado, Boulder, Boulder, CO 80303, United States; Singh, V., Department of Chemical and Biological Engineering, University of Colorado, Boulder, Boulder, CO 80303, United States; Ribot, J.C., Department of Chemical and Biological Engineering, University of Colorado, Boulder, Boulder, CO 80303, United States; Chatte…		Nanobioelectronics
Gotz M.E., Dirr A., Gsell W., Burger R., Janetzky B., Freyberger A., Reichmann H., Rausch W.-D., Riederer P.	Review	1994	Influence of N-methyl-4-phenyl-1,2,3,6-tetrahydropyridine, lipoic acid and L-deprenyl on the interplay between cellular redox systems	For several years there is controversy concerning the toxic potency of reaction products catalyzed by monoamine oxidase in neurodegenerative processes. There is uncertainty whether products of catecholamine oxidation are pathogenetically relevant factors for neuronal cell death in Parkinson's disease. To date products responsible for impairment of biochemical functions essential for cell viabilit…	0	0	English	biochemistry, ETC complex, mitochondria, not PD related	Scopus	Journal of Neural Transmission, Supplement		43		145	162			https://www.scopus.com/inward/record.uri?eid=2-s2.0-0028170912&partnerID=40&md5=d9b6ed4ec1068eda88a694981419805a	Department of Psychiatry, Division of Clinical Neurochemistry, University of Wurzburg, Fuchsleinstrasse 15, D-97080 Wurzburg, Germany	Gotz, M.E., Department of Psychiatry, Division of Clinical Neurochemistry, University of Wurzburg, Fuchsleinstrasse 15, D-97080 Wurzburg, Germany; Dirr, A., Department of Psychiatry, Division of Clinical Neurochemistry, University of Wurzburg, Fuchsleinstrasse 15, D-97080 Wurzburg, Germany; Gsell, W., Department of Psychiatry, Division of Clinical Neurochemistry, University of Wurzburg, Fuchslein…		1,2,3,6 tetrahydro 1 methyl 4 phenylpyridine; amine oxidase (flavin containing); ammonia; diethyldithiocarbamic acid; dihydrolipoate; hydrogen peroxide; selegiline; thioctic acid; 1,2,3,6 tetrahydro 1 methyl 4 phenylpyridine; selegiline; thioctic acid; animal cell; animal experiment; animal model; animal tissue; cytotoxicity; intraperitoneal drug administration; male; mitochondrion; mouse; nerve …
Grace J.M., Kinter M.T., Macdonald T.L.	Article	1994	Atypical Metabolism of Deprenyl and Its Enantiomer, (S)-(+)-N,α-Dimethyl-N-propynylphenethylamine, by Cytochrome P450 2D6	Debrisoquine 4-hydroxylase is a unique cytochrome P450 that effects oxidation of protonated substrates at sites distal from the basic nitrogen. A basic tenet of the several models that have been proposed for the active site of P450 2D6 is that oxidation occurs at distances of ~ 5 or ~ 7 Å from the protonated site. In this study, the metabolism of both stereoisomers of deprenyl, a therapeutically …	0	1	English	biochemistry, cyotchrome, not related to PD	Scopus	Chemical Research in Toxicology	7	3		286	290		10.1021/tx00039a003	https://www.scopus.com/inward/record.uri?eid=2-s2.0-0028316987&doi=10.1021%2ftx00039a003&partnerID=40&md5=c32e24d338cd9be4cfc6933d163c621f	Department of Chemistry, University of Virginia, Charlottesville, Virginia 22901, United States; Departments of Microbiology and Pathology, University of Virginia, Charlottesville, Virginia 22908, United States; Department of Chemistry, University of Virginia, United States; Departments of Microbiology and Pathology, University of Virginia, United States	Grace, J.M., Department of Chemistry, University of Virginia, Charlottesville, Virginia 22901, United States, Departments of Microbiology and Pathology, University of Virginia, Charlottesville, Virginia 22908, United States, Department of Chemistry, University of Virginia, United States; Kinter, M.T., Department of Chemistry, University of Virginia, Charlottesville, Virginia 22901, United States,…		cytochrome p450; methamphetamine; selegiline; animal tissue; article; competitive inhibition; demethylation; drug metabolism; enantiomer; enzyme activity; liver microsome; nonhuman; parkinson disease; rat; Animal; Chromatography, High Pressure Liquid; Cytochrome P-450 CYP2D6; Cytochrome P-450 Enzyme System; Human; In Vitro; Male; Mass Fragmentography; Microsomes, Liver; Mixed Function Oxygenases;…
Greenamyre J.T., Sherer T.B., Betarbet R., Panov A.V.	Review	2001	Complex I and Parkinson's disease	Complex I of the mammalian electron transfer chain is composed of at least 43 protein subunits, of which 7 are encoded by mtDNA. It catalyzes the transfer of electrons from NADH to ubiquinone and translocates protons from the mitochondrial matrix to the intermembrane space. It may also play direct roles in the mitochondrial permeability transition and in cell death pathways. Despite the limitatio…	1	1	English	biochemistry, PD	Scopus	IUBMB Life	52	3-5		135	141		10.1080/15216540152845939	https://www.scopus.com/inward/record.uri?eid=2-s2.0-0036138997&doi=10.1080%2f15216540152845939&partnerID=40&md5=30811479fdd5ddbb2362b6ceec4f57b1	Emory University School of Medicine, Department of Neurology, WMRB 6000, 1639 Pierce Drive, Atlanta, GA 30322, United States	Greenamyre, J.T., Emory University School of Medicine, Department of Neurology, WMRB 6000, 1639 Pierce Drive, Atlanta, GA 30322, United States; Sherer, T.B., Emory University School of Medicine, Department of Neurology, WMRB 6000, 1639 Pierce Drive, Atlanta, GA 30322, United States; Betarbet, R., Emory University School of Medicine, Department of Neurology, WMRB 6000, 1639 Pierce Drive, Atlanta, …		mitochondrial DNA; protein subunit; reduced nicotinamide adenine dinucleotide; reduced nicotinamide adenine dinucleotide dehydrogenase (ubiquinone); rotenone; ubiquinone; cell death; electron transport; enzyme defect; enzyme inhibition; enzyme mechanism; human; mammal; membrane permeability; mitochondrial membrane; Parkinson disease; pathogenesis; proton transport; review; Mammalia
Guarani V., Paulo J., Zhai B., Huttlin E.L., Gygi S.P., Harper J.W.	Article	2014	TIMMDC1/C3orf1 functions as a membrane-embedded mitochondrial complex I assembly factor through association with the MCIA complex	Complex I (CI) of the electron transport chain, a large membrane-embedded NADH dehydrogenase, couples electron transfer to the release of protons into the mitochondrial inner membrane space to promote ATP production through ATP synthase. In addition to being a central conduit for ATP production, CI activity has been linked to neurodegenerative disorders, including Parkinson's disease. CI is built…	1	1	English	PD related to complex I, protemics study	Scopus	Molecular and Cellular Biology	34	5		847	861		10.1128/MCB.01551-13	https://www.scopus.com/inward/record.uri?eid=2-s2.0-84893853456&doi=10.1128%2fMCB.01551-13&partnerID=40&md5=3d5e9272a19f30a3cc4db74bd2566d06	Department of Cell Biology, Harvard Medical School, Boston, MA, United States; St. Jude Childrens Research Hospital, Therapeutics Production and Quality, Memphis, TN, United States	Guarani, V., Department of Cell Biology, Harvard Medical School, Boston, MA, United States; Paulo, J., Department of Cell Biology, Harvard Medical School, Boston, MA, United States; Zhai, B., Department of Cell Biology, Harvard Medical School, Boston, MA, United States, St. Jude Childrens Research Hospital, Therapeutics Production and Quality, Memphis, TN, United States; Huttlin, E.L., Department…		Amino Acid Sequence; Cell Line; Cell Line, Tumor; Electron Transport Complex I; HCT116 Cells; HEK293 Cells; HeLa Cells; Humans; Membrane Proteins; Mitochondria; Mitochondrial Membrane Transport Proteins; Mitochondrial Membranes; Molecular Sequence Data; Proteomics
Hansen A.G., Salvatore P., Karlsen K.K., Nichols R.J., Wengel J., Ulstrup J.	Article	2013	Electrochemistry and in situ scanning tunnelling microscopy of pure and redox-marked DNA- and UNA-based oligonucleotides on Au(111)-electrode surfaces	We have studied adsorption and electrochemical electron transfer of several 13- and 15-base DNA and UNA (unlocked nucleic acids) oligonucleotides (ONs) linked to Au(111)-electrode surfaces via a 5′-C6-SH group using cyclic voltammetry (CV) and scanning tunnelling microscopy in aqueous buffer under electrochemical potential control (in situ STM). 2,2′,6′,2″- Terpyridine (terpy) onto which the tran…	2	1	English	STM electrochemical, 13 and 15 base pairs, no PD related	Scopus	Physical Chemistry Chemical Physics	15	3		776	786		10.1039/c2cp42351k	https://www.scopus.com/inward/record.uri?eid=2-s2.0-84871336790&doi=10.1039%2fc2cp42351k&partnerID=40&md5=d5e337ec00db3151ea1dca58c29f765b	Department of Chemistry, Building 207, Technical University of Denmark, DK-2800 Kongens Lyngby, Denmark; Department of Physics, Chemistry and Pharmacy, Nucleic Acid Center, University of Southern Denmark, Campusvej 55, DK-5230, Odense M, Denmark; Department of Chemistry, University of Liverpool, Liverpool L69 7ZD, United Kingdom	Hansen, A.G., Department of Chemistry, Building 207, Technical University of Denmark, DK-2800 Kongens Lyngby, Denmark; Salvatore, P., Department of Chemistry, Building 207, Technical University of Denmark, DK-2800 Kongens Lyngby, Denmark; Karlsen, K.K., Department of Physics, Chemistry and Pharmacy, Nucleic Acid Center, University of Southern Denmark, Campusvej 55, DK-5230, Odense M, Denmark; Nic…		DNA; gold; locked nucleic acid; oligonucleotide; transition element; article; chemistry; electrochemical analysis; electrode; electron transport; oxidation reduction reaction; scanning tunneling microscopy; DNA; Electrochemical Techniques; Electrodes; Electron Transport; Gold; Microscopy, Scanning Tunneling; Oligonucleotides; Oxidation-Reduction; Transition Elements
Hare D., Ayton S., Bush A., Lei P.	Review	2013	A delicate balance: Iron metabolism and diseases of the brain	Iron is the most abundant transition metal within the brain, and is vital for a number of cellular processes including neurotransmitter synthesis, myelination of neurons, and mitochondrial function. Redox cycling between ferrous and ferric iron is utilized in biology for various electron transfer reactions essential to life, yet this same chemistry mediates deleterious reactions with oxygen that …	0	1	English	iron neurophysiology, brain disease	Scopus	Frontiers in Aging Neuroscience	5	JUL	Article 34				10.3389/fnagi.2013.00034	https://www.scopus.com/inward/record.uri?eid=2-s2.0-84897365963&doi=10.3389%2ffnagi.2013.00034&partnerID=40&md5=e239ac072ec0aba4f62dc6de3b38f610	The Florey Institute of Neuroscience and Mental Health, University of Melbourne, VIC, Australia; Elemental Bio-imaging Facility, University of Technology, Sydney, NSW, Australia	Hare, D., The Florey Institute of Neuroscience and Mental Health, University of Melbourne, VIC, Australia, Elemental Bio-imaging Facility, University of Technology, Sydney, NSW, Australia; Ayton, S., The Florey Institute of Neuroscience and Mental Health, University of Melbourne, VIC, Australia; Bush, A., The Florey Institute of Neuroscience and Mental Health, University of Melbourne, VIC, Austra…	Alzheimer's disease; Iron chelation; Iron deficiency; Iron regulation; Parkinson's disease	adrenalin; amyloid beta protein; carrier protein; catalase; ceruloplasmin; deferoxamine; dopamine; dopamine 2 receptor; dopamine transporter; ferritin; ferroportin; ferrous sulfate; glycogen synthase kinase 3; iron; iron binding protein; iron chelating agent; iron regulatory factor; iron regulatory factor 1; iron regulatory factor 2; iron transporter protein; messenger RNA; myelin; natural resist…
Hashimoto M., Takeda A., Hsu L.J., Takenouchi T., Masliah E.	Article	1999	Role of cytochrome c as a stimulator of α-synuclein aggregation in Lewy body disease	α-Synuclein is a major component of aggregates forming amyloid-like fibrils in diseases with Lewy bodies and other neurodegenerative disorders, yet the mechanism by which α-synuclein is intracellularly aggregated during neurodegeneration is poorly understood. Recent studies suggest that oxidative stress reactions might contribute to abnormal aggregation of this molecule. In this context, the main…	1	1	English	biochemistry cytochrome c, PD, but no DNA	Scopus	Journal of Biological Chemistry	274	41		28849	28852		10.1074/jbc.274.41.28849	https://www.scopus.com/inward/record.uri?eid=2-s2.0-0032879452&doi=10.1074%2fjbc.274.41.28849&partnerID=40&md5=77600fbe75cecb349088d6af3a32887f	Department of Neurosciences, University of California San Diego, School of Medicine, San Diego, CA 92093-0624, United States; Department of Pathology, University of California San Diego, School of Medicine, San Diego, CA 92093-0624, United States; Department of Psychiatry, Yokohama City University, School of Medicine, 3-9 Fukuura, Kanazawa-ku, Yokohama 236, Japan; Dept. of Neurosciences, Universi…	Hashimoto, M., Department of Neurosciences, University of California San Diego, School of Medicine, San Diego, CA 92093-0624, United States; Takeda, A., Department of Neurosciences, University of California San Diego, School of Medicine, San Diego, CA 92093-0624, United States, Department of Psychiatry, Yokohama City University, School of Medicine, 3-9 Fukuura, Kanazawa-ku, Yokohama 236, Japan; H…		acetylcysteine; alpha synuclein; cytochrome c; hydrogen peroxide; apoptosis; article; cell death; clinical article; degenerative disease; enzyme activity; enzyme localization; human; human tissue; immunohistochemistry; Lewy body; ligand binding; neurologic disease; oxidative stress; Parkinson disease; priority journal
Imai Y	Journal Article	2020	PINK1-Parkin signaling in Parkinson's disease: Lessons from Drosophila.	The mitochondrial protein kinase PINK1 activates Parkin ubiquitin ligase by phosphorylating Parkin and ubiquitin, which are required for mitochondrial maintenance in dopaminergic (DA) neurons whose degeneration leads to the development of Parkinson's disease (PD). Loss of PINK1 and Parkin leads to mitochondrial degeneration and abnormal wing posture in Drosophila. Modifier screening using the Dro…	1	1	English	biochemistry	EBSCOhost MEDLINE	Neuroscience research	159			40			10.1016/j.neures.2020.01.016				Drosophila Proteins; Mitochondria genetics; Mitochondria pathology; Parkinson Disease enzymology; Parkinson Disease genetics; Parkinson Disease physiopathology; Protein-Serine-Threonine Kinases; Ubiquitin-Protein Ligases genetics; Ubiquitin-Protein Ligases metabolism; Animals; DNA-Binding Proteins metabolism; Disease Models, Animal; Drosophila; Humans; Protein Kinases genetics; Protein Kinases me…
Jacintho J.D., Kovacic P.	Review	2003	Neurotransmission and neurotoxicity by nitric oxide, catecholamines, and Glutamate: Unifying themes of reactive oxygen species and electron transfer	This review treats the mechanism of nitric oxide, catecholamines, and glutamate as important neurotransmitters and as neurotoxins, based on involvement of reactive oxygen species (ROS) and electron transfer (ET). ROS and ET can serve as a unifying framework for both transmission and toxicity, with ROS concentration being a crucial issue. Cell signaling, electrochemistry, antioxidants, and apoptos…	2	1	English	DNA, biochemistry, ROS, ET, no STM	Scopus	Current Medicinal Chemistry	10	24		2693	2703		10.2174/0929867033456404	https://www.scopus.com/inward/record.uri?eid=2-s2.0-0345255903&doi=10.2174%2f0929867033456404&partnerID=40&md5=d34b1f9bb9fc9d5f734d43f0187de4e8	Department of Chemistry, San Diego State University, San Diego, CA 92182-1030, United States	Jacintho, J.D., Department of Chemistry, San Diego State University, San Diego, CA 92182-1030, United States; Kovacic, P., Department of Chemistry, San Diego State University, San Diego, CA 92182-1030, United States	Antioxidants; Catecholamines; Cell signaling; Electron transfer; Gutamate; Neurotoxicity; Neurotransmission; Nitric oxide; Oxidative stress; Reactive oxygen species	1h 1,2,4 oxadiazolo[4,3 a]quinoxalin 1 one; 6 anilino 5,8 quinolinequinone; adrenalin; alpha tocopherol; antioxidant; benzothiazine derivative; beta carboline; black tea extract; carboxylic acid derivative; catecholamine; dopamine; flavonoid; gallic acid propyl ester; glutamic acid; glutathione; green tea extract; herbicide; metal chelate; methylene blue; neurotoxin; neurotransmitter; nitric oxid…
Janetzky B., God R., Bringmann G., Reichmann H.	Conference Paper	1995	1-Trichloromethyl-1,2,3,4-tetrahydro-β-carboline, a new inhibitor of complex I	The neurotoxic agent MPP+ is an artificial substance producing a syndrome very similar to that of idiopathic Parkinson's disease. There are also naturally occuring neurotoxic substances under discussion like the group of isoquinoline and β-carboline alkaloids. All these substances are more or less powerfull inhibitors of complex I of the mitochondrial oxidative phosphorylation. This study examine…	0	0	English	biochemistry, ETC complex, mitochondria, idiopathic PD like syndrome	Scopus	Journal of Neural Transmission, Supplement		46		265	273			https://www.scopus.com/inward/record.uri?eid=2-s2.0-0029414754&partnerID=40&md5=4050b8058261365efad0113c72799418	University of Wurzburg, Department of Neurology, Josef Schneider Strasse 11, D-97080 Wurzburg, Germany	Janetzky, B., University of Wurzburg, Department of Neurology, Josef Schneider Strasse 11, D-97080 Wurzburg, Germany; God, R., University of Wurzburg, Department of Neurology, Josef Schneider Strasse 11, D-97080 Wurzburg, Germany; Bringmann, G., University of Wurzburg, Department of Neurology, Josef Schneider Strasse 11, D-97080 Wurzburg, Germany; Reichmann, H., University of Wurzburg, Department…		1 trichloromethyl 1,2,3,4 tetrahydro beta carboline; beta carboline derivative; unclassified drug; 1 methyl 4 phenylpyridinium; 1-trichloromethyl-1,2,3,4-tetrahydro-beta-carboline; biological marker; carboline derivative; enzyme inhibitor; neurotoxin; reduced nicotinamide adenine dinucleotide (phosphate) dehydrogenase (quinone); animal tissue; brain homogenate; conference paper; controlled study;…
Janssen R.J.R.J., Nijtmans L.G., van den Heuvel L.P., Smeitink J.A.M.	Review	2006	Mitochondrial complex I: Structure, function and pathology	Oxidative phosphorylation (OXPHOS) has a prominent role in energy metabolism of the cell. Being under bigenomic control, correct biogenesis and functioning of the OXPHOS system is dependent on the finely tuned interaction between the nuclear and the mitochondrial genome. This suggests that disturbances of the system can be caused by numerous genetic defects and can result in a variety of metaboli…	0	1	English	not related to PD	Scopus	Journal of Inherited Metabolic Disease	29	4		499	515		10.1007/s10545-006-0362-4	https://www.scopus.com/inward/record.uri?eid=2-s2.0-33746878763&doi=10.1007%2fs10545-006-0362-4&partnerID=40&md5=f8013ef7f3eba352c8d7cea9d6b55783	Nijmegen Centre for Mitochondrial Disorders, Laboratory of Paediatrics and Neurology, Radboud University Nijmegen Medical Centre, Nijmegen, Netherlands	Janssen, R.J.R.J., Nijmegen Centre for Mitochondrial Disorders, Laboratory of Paediatrics and Neurology, Radboud University Nijmegen Medical Centre, Nijmegen, Netherlands; Nijtmans, L.G., Nijmegen Centre for Mitochondrial Disorders, Laboratory of Paediatrics and Neurology, Radboud University Nijmegen Medical Centre, Nijmegen, Netherlands; van den Heuvel, L.P., Nijmegen Centre for Mitochondrial Di…		bacterial complex 1; bacterial enzyme; cardiolipin; chaperone; cytochrome b; frataxin; gene associated with retinoid interferon induced mortality 19 protein; membrane protein; mitochondrial DNA; myc induced mitochondrial protein; reduced nicotinamide adenine dinucleotide; reduced nicotinamide adenine dinucleotide dehydrogenase; reduced nicotinamide adenine dinucleotide dehydrogenase (ubiquinone);…
Jiang, Xian Li, Li Ying, Zhengxin Pan, Chenjie Huang, Shaoqiang Li, Lin Dai, Miaomiao Yan, Bo Li, Ming Jiang, Hui Chen, She Zhang, Zhiyuan Wang, Xiaodong	Journal Article	2016	A Small Molecule That Protects the Integrity of the Electron Transfer Chain Blocks the Mitochondrial Apoptotic Pathway	Summary In response to apoptotic stimuli, mitochondria in mammalian cells release cytochrome c and other apoptogenic proteins, leading to the subsequent activation of caspases and apoptotic cell death. This process is promoted by the pro-apoptotic members of the Bcl-2 family of proteins, such as Bim and Bax, which, respectively, initiate and execute cytochrome c release from the mitochondria. Her…	1	1	English	biochemistry, neuroscience	Sciencedirect	Molecular Cell	63	2		229-239			https://doi.org/10.1016/j.molcel.2016.06.016	https://www.sciencedirect.com/science/article/pii/S109727651630274X
Jin Z., Fu Z., Yang J., Troncosco J., Everett A.D., Van Eyk J.E.	Article	2013	Identification and characterization of citrulline-modified brain proteins by combining HCD and CID fragmentation	Citrullination is a protein PTM of arginine residues catalyzed by peptidylarginine deiminase. Protein citrullination has been detected in the CNS and associated with a number of neurological diseases. However, identifying citrullinated proteins from complex mixtures and pinpointing citrullinated residues have been limited. Using RP LC and high-resolution MS, this study determined in vitro citrull…	0	0	English	Alzheimer related, bichemistry, liquid chromatography, MS mass spectrometry	Scopus	Proteomics	13	17		2682	2691		10.1002/pmic.201300064	https://www.scopus.com/inward/record.uri?eid=2-s2.0-84883302060&doi=10.1002%2fpmic.201300064&partnerID=40&md5=dc10fe989903274edb7d86d261fd67fe	Department of Medicine, Division of Cardiology, Johns Hopkins University, Baltimore, MD, United States; Department of Pediatrics, Division of Hematology, Johns Hopkins University, Baltimore, MD, United States; Department of Pediatrics, Division of Cardiology, Johns Hopkins University, Baltimore, MD, United States; Department of Pathology, Division of Neuropathology, Johns Hopkins University, Balt…	Jin, Z., Department of Medicine, Division of Cardiology, Johns Hopkins University, Baltimore, MD, United States; Fu, Z., Department of Pediatrics, Division of Hematology, Johns Hopkins University, Baltimore, MD, United States; Yang, J., Department of Pediatrics, Division of Cardiology, Johns Hopkins University, Baltimore, MD, United States; Troncosco, J., Department of Pathology, Division of Neur…	Biomedicine; Citrullination; GFAP; Mass spectrometry; MBP; NRGN	amino acid; arginine; brain protein; citrulline; complementary DNA; glial fibrillary acidic protein; myelin basic protein; neurogranin; peptide; protein arginine deiminase; trypsin; aged; Alzheimer disease; analytical equipment; animal tissue; article; autoimmunity; brain; central nervous system; chemical structure; collisionally activated dissociation; controlled study; disease association; elec…
Keeney P.M., Xie J., Capaldi R.A., Bennett Jr. J.P.	Article	2006	Parkinson's disease brain mitochondrial complex I has oxidatively damaged subunits and is functionally impaired and misassembled	Loss of mitochondrial complex I catalytic activity in the electron transport chain (ETC) is found in multiple tissues from individuals with sporadic Parkinson's disease (PD) and is a property of some PD model neurotoxins. Using special ETC subunit-specific and complex I immunocapture antibodies directed against the entire complex I macroassembly, we quantified ETC proteins and protein oxidation o…	2	1	English	PD, biochemistry, complex I	Scopus	Journal of Neuroscience	26	19		5256	5264		10.1523/JNEUROSCI.0984-06.2006	https://www.scopus.com/inward/record.uri?eid=2-s2.0-33646948530&doi=10.1523%2fJNEUROSCI.0984-06.2006&partnerID=40&md5=902fd6ba78dbbe5e679b28dd3a7c0360	Center for the Study of Neurodegenerative Diseases, University of Virginia, Charlottesville, VA 22908, United States; Institute of Molecular Biology, University of Oregon, Eugene, OR 97403, United States; MitoSciences, Inc., Eugene, OR 97403, United States; P.O. Box 800394, Charlottesville, VA 22908, United States	Keeney, P.M., Center for the Study of Neurodegenerative Diseases, University of Virginia, Charlottesville, VA 22908, United States; Xie, J., Institute of Molecular Biology, University of Oregon, Eugene, OR 97403, United States; Capaldi, R.A., Institute of Molecular Biology, University of Oregon, Eugene, OR 97403, United States, MitoSciences, Inc., Eugene, OR 97403, United States; Bennett Jr., J.P…	Complex I; Electron transport chain; Mitochondria; Oxygenase; Parkinson's disease; Protein oxidation	reduced nicotinamide adenine dinucleotide; reduced nicotinamide adenine dinucleotide dehydrogenase (ubiquinone); rotenone; protein subunit; reduced nicotinamide adenine dinucleotide dehydrogenase (ubiquinone); adult; aged; article; brain mitochondrion; catalysis; clinical article; controlled study; female; frontal cortex; human; human tissue; kinetics; male; oxidation; Parkinson disease; priority…
Kiriyama K., Ohtaki H., Kobayashi N., Murai N., Matsumoto M., Sasaki S., Sawa C., Satoh K., Matsunaga M., Shioda S.	Article	2015	A Nucleoprotein-Enriched Diet Suppresses Dopaminergic Neuronal Cell Loss and Motor Deficit in Mice with MPTP-Induced Parkinson’s Disease	Parkinson’s disease (PD) is an obstinate progressive neurodegenerative disease and characterized by locomotor impairment and dopaminergic neuronal degeneration in the substantia nigra pars compacta (SNc). We examined in here the dietary effect of nucleoprotein (NP) extracted from salmon soft roe on 1-methyl-4-phenyl-1,2,3,6-tetrahydropyridine (MPTP)-injected PD-like mice model to prevent the symp…	0	0	English	PD, animal study, effect of cod fish extract nucleoprotein to treat PD	Scopus	Journal of Molecular Neuroscience	55	3		803	811		10.1007/s12031-014-0432-2	https://www.scopus.com/inward/record.uri?eid=2-s2.0-84922251229&doi=10.1007%2fs12031-014-0432-2&partnerID=40&md5=58d0cf934552cead7a50534508596949	Department of Anatomy, Showa University School of Medicine, 1-5-8 Hatanodai, Shinagawa-ku, Tokyo 142-8555, Japan; Gene Trophology Research Institute, Tokyo, 130-0012, Japan	Kiriyama, K., Department of Anatomy, Showa University School of Medicine, 1-5-8 Hatanodai, Shinagawa-ku, Tokyo 142-8555, Japan; Ohtaki, H., Department of Anatomy, Showa University School of Medicine, 1-5-8 Hatanodai, Shinagawa-ku, Tokyo 142-8555, Japan; Kobayashi, N., Department of Anatomy, Showa University School of Medicine, 1-5-8 Hatanodai, Shinagawa-ku, Tokyo 142-8555, Japan; Murai, N., Depar…	Dopaminergic neuron; Nucleoprotein; Oxidative stress; Parkinson’s disease	antibody; Iba1 antibody; nucleoprotein; superoxide; tyrosine 3 monooxygenase; unclassified drug; cytochrome c oxidase; nucleoprotein; superoxide; tyrosine 3 monooxygenase; animal experiment; animal model; animal tissue; Article; cell loss; controlled study; Cox8b gene; diet supplementation; dopaminergic nerve cell; electron transport; gene; gene expression; immunohistochemistry; immunoreactivity;…
Kitagawa K., Morita T., Kimura S.	Article	2005	Molecular rectification of a helical peptide with a redox group in the metal-molecule-metal junction	A helical hexadecapeptide immobilized on gold via a thiophenyl group at the N-terminal was analyzed by scanning tunneling microscopy under ultrahigh vacuum to obtain the I-V response at a molecular level. The attenuation factor of the electron transfer through the hexadecapeptide was determined by applying the Simons model to the I-Vresponse to show better molecular conductance of the hexadecapep…	2	1	English	STM, molecular ET, no PD	Scopus	Journal of Physical Chemistry B	109	29		13906	13911		10.1021/jp050642e	https://www.scopus.com/inward/record.uri?eid=2-s2.0-23844483436&doi=10.1021%2fjp050642e&partnerID=40&md5=28463ea6eaef0494e15d097dbeab1a3a	Department of Material Chemistry, Graduate School of Engineering, Kyoto University, Nishikyo-ku, Kyoto 615-8510, Japan	Kitagawa, K., Department of Material Chemistry, Graduate School of Engineering, Kyoto University, Nishikyo-ku, Kyoto 615-8510, Japan; Morita, T., Department of Material Chemistry, Graduate School of Engineering, Kyoto University, Nishikyo-ku, Kyoto 615-8510, Japan; Kimura, S., Department of Material Chemistry, Graduate School of Engineering, Kyoto University, Nishikyo-ku, Kyoto 615-8510, Japan		Characterization; Charge transfer; Chemical modification; DNA; Electric conductance; Electric potential; Mass spectrometry; Molecular dynamics; Nuclear magnetic resonance spectroscopy; Redox reactions; Scanning tunneling microscopy; Thin layer chromatography; Circular dichroism; Helical peptides; Molecular rectification; Spectropolarimeters; Amino acids; 2 amino 2 methylpropionic acid; 2-aminoiso…
Konijnenberg A., Ranica S., Narkiewicz J., Legname G., Grandori R., Sobott F., Natalello A.	Article	2016	Opposite Structural Effects of Epigallocatechin-3-gallate and Dopamine Binding to α-Synuclein	The intrinsically disordered and amyloidogenic protein α-synuclein (AS) has been linked to several neurodegenerative states, including Parkinson's disease. Here, nanoelectrospray-ionization mass spectrometry (nano-ESI-MS), ion mobility (IM), and native top-down electron transfer dissociation (ETD) techniques are employed to study AS interaction with small molecules known to modulate its aggregati…	1	1	English	biochemistry	Scopus	Analytical Chemistry	88	17		8468	8475		10.1021/acs.analchem.6b00731	https://www.scopus.com/inward/record.uri?eid=2-s2.0-84985898388&doi=10.1021%2facs.analchem.6b00731&partnerID=40&md5=08dd192c212ba3939dcf11d4e6576ee8	Biomolecular and Analytical Mass Spectrometry, University of Antwerp, Groenenborgerlaan 171, Antwerp, 2020, Belgium; Department of Biotechnology and Biosciences, University of Milano-Bicocca, Piazza della Scienza 2, Milan, 20126, Italy; Department of Neuroscience, Scuola Internazionale Superiore di Studi Avanzati (SISSA), ELETTRA-Sincrotrone Trieste S.C.p.A, Trieste, 34136, Italy; Astbury Centre …	Konijnenberg, A., Biomolecular and Analytical Mass Spectrometry, University of Antwerp, Groenenborgerlaan 171, Antwerp, 2020, Belgium; Ranica, S., Department of Biotechnology and Biosciences, University of Milano-Bicocca, Piazza della Scienza 2, Milan, 20126, Italy; Narkiewicz, J., Department of Neuroscience, Scuola Internazionale Superiore di Studi Avanzati (SISSA), ELETTRA-Sincrotrone Trieste S…		Amines; Complexation; Conformations; Dissociation; Mass spectrometry; Neurodegenerative diseases; Neurophysiology; Proteins; Amyloidogenic proteins; Covalent modifications; Electron-transfer dissociation; Epigallocatechin-3-gallate; Identical conditions; Nanoelectrospray ionization mass spectrometry; Parkinson's disease; Protein-ligand complexes; Ligands; alpha synuclein; catechin; dopamine; epig…
Kostyukevich Y., Zhdanova E., Kononikhin A., Popov I., Kukaev E., Nikolaev E.	Article	2015	Observation of the multiple halogenation of peptides in the electrospray ionization source	The chlorination of peptides and proteins is an important posttranslational modification, which is a physiological signature of an enzyme myeloperoxidase and can serve as a potential biomarker of some diseases (Parkinson's disease, Alzheimer's disease, etc.). The quantification of the chlorinated peptides has been very challenging in part due to their low levels and artifacts associated with samp…	0	1	English	ESI to detect biomarker for diseases	Scopus	Journal of Mass Spectrometry	50	7		899	905		10.1002/jms.3599	https://www.scopus.com/inward/record.uri?eid=2-s2.0-84946117466&doi=10.1002%2fjms.3599&partnerID=40&md5=74d19f5c24417975786eb48e6c5f6f50	Skolkovo Institute of Science and Technology, Novaya St., 100, Skolkovo, 143025, Russian Federation; Institute for Energy Problems of Chemical Physics, Russian Academy of Sciences, Leninskij pr. 38 k.2, Moscow, 119334, Russian Federation; Moscow Institute of Physics and Technology, Dolgoprudnyi, Moscow Region, 141700, Russian Federation; Emanuel Institute for Biochemical Physics, Russian Academy …	Kostyukevich, Y., Skolkovo Institute of Science and Technology, Novaya St., 100, Skolkovo, 143025, Russian Federation, Institute for Energy Problems of Chemical Physics, Russian Academy of Sciences, Leninskij pr. 38 k.2, Moscow, 119334, Russian Federation, Moscow Institute of Physics and Technology, Dolgoprudnyi, Moscow Region, 141700, Russian Federation; Zhdanova, E., Institute for Energy Proble…	adduct formation; chlorine; electrospray; FT ICR; peptides	Amination; Chlorination; Chlorine; Chlorine compounds; Dissociation; Electric grounding; Electric potential; Electrospray ionization; Ionization; Mass spectrometry; Neurodegenerative diseases; Peptides; Syringes; Adduct formation; Collision induced dissociation; Electron capture dissociation; Electrospray ionization mass spectrometry; Electrosprays; FT ICR; Physiological signatures; Post-translat…
Kovacic P., Somanathan R.	Review	2010	Electromagnetic fields: Mechanism, cell signaling, other bioprocesses, toxicity, radicals, antioxidants and beneficial effects	Electromagnetic fields (EMFs) played a role in the initiation of living systems, as well as subsequent evolution. The more recent literature on electrochemistry is documented, as well as magnetism. The large numbers of reports on interaction with living systems and the consequences are presented. An important aspect is involvement with cell signaling and resultant effects in which numerous signal…	0	0	English	electromagnetic field effect on health – no DNA PD related	Scopus	Journal of Receptors and Signal Transduction	30	4		214	226		10.3109/10799893.2010.488650	https://www.scopus.com/inward/record.uri?eid=2-s2.0-77954472068&doi=10.3109%2f10799893.2010.488650&partnerID=40&md5=c75c21cd6e888e20cc2f3f3cb74225c6	Department of Chemistry, San Diego State University, San Diego, CA, United States; Centro de Graduados e Investigación, Instituto Tecnológico de Tijuana, Apdo postal, Tijuana, B.C. Mexico, Mexico	Kovacic, P., Department of Chemistry, San Diego State University, San Diego, CA, United States; Somanathan, R., Centro de Graduados e Investigación, Instituto Tecnológico de Tijuana, Apdo postal, Tijuana, B.C. Mexico, Mexico	Antioxidants (AOs); Cell phones; Electromagnetic fields (EMFs); Electron transfer (ET); Oxidative stress (OS); Reactive oxygen species (ROS)	antioxidant; radical; reactive oxygen metabolite; bioprocess; bone remodeling; cell membrane; depression; electrochemistry; electromagnetic field; electron transport; electrostimulation therapy; fracture; healing; human; magnetism; mobile phone; neoplasm; nonhuman; oxidative stress; Parkinson disease; review; signal transduction; Animals; Antioxidants; Cellular Phone; Electromagnetic Fields; Free…
Kuter, Katarzyna Z Olech, Łukasz Dencher, Norbert A	Article	2019	Increased energetic demand supported by mitochondrial electron transfer chain and astrocyte assistance is essential to maintain the compensatory ability of the dopaminergic neurons in an animal model of early Parkinson's disease	Partial degeneration of dopaminergic neurons in the substantia nigra (SN), induces locomotor disability in animals but with time it is spontaneously compensated for by neurons surviving in the tissue by increasing their functional efficiency. Such compensation probably increases energy requirements and astrocyte support could be essential for this ability. We studied the effect of degeneration of…	1	1	English	neuroscience, biochemistry	Sciencedirect	Mitochondrion	47			227-237			https://doi.org/10.1016/j.mito.2018.12.002	https://www.sciencedirect.com/science/article/pii/S1567724918300953			Adaptation Energy metabolism Neurodegeneration Parkinson's disease Succinate dehydrogenase Supramolecular complexes
La M., Chen C.-D., Li H., Yang C.-Y.	Article	2014	Modulation of iron catalytic activity to dopamine oxidation through additional Iron ligation	Parkinson's disease (PD) is characterized by the selective degeneration of dopaminergic cells. This bodes well for the role of dopamine (DA) in the etiology of PD, possibly through the Fe(III) catalyzed production of DA derived neuronal toxins. We investigated how the presence of iron ligation of nitrilotriacetic acid (NTA, a well known tetradentate ligand) affected the catalytic oxidation reacti…	1	1	English	biochemistry, DA, ET	Scopus	International Journal of Electrochemical Science	9	12		6870	6879			https://www.scopus.com/inward/record.uri?eid=2-s2.0-84908680934&partnerID=40&md5=bd416c3000b22303f97452c8bfd50101	College of Chemistry and Chemical Engineering, Pingdingshan University, Pingdingshan, Henan, 467000, China	La, M., College of Chemistry and Chemical Engineering, Pingdingshan University, Pingdingshan, Henan, 467000, China; Chen, C.-D., College of Chemistry and Chemical Engineering, Pingdingshan University, Pingdingshan, Henan, 467000, China; Li, H., College of Chemistry and Chemical Engineering, Pingdingshan University, Pingdingshan, Henan, 467000, China; Yang, C.-Y., College of Chemistry and Chemical…	Catalytic activity; Dopamine; Electrochemistry; Hydrogen peroxide; Iron; Nitrilotriacetic acid
Lambert de Malezieu M., Courtel P., Sleno L., Abasq M.-L., Ramassamy C.	Article	2019	Synergistic properties of bioavailable phenolic compounds from olive oil: electron transfer and neuroprotective properties	Phenolic compounds from olive oil (ArOH-EVOO) are recognized for their antioxidant and neuroprotective capacities, but are often studied individually or through a natural extract. As their reactivity towards reactive oxygen species (ROS) depends on their structure and could implicate different complementary mechanisms, we hypothesized that their effects could be enhanced by an innovative combinat…	0	0	English	ROS reactive oxygen species	Scopus	Nutritional Neuroscience							10.1080/1028415X.2019.1666480	https://www.scopus.com/inward/record.uri?eid=2-s2.0-85074010567&doi=10.1080%2f1028415X.2019.1666480&partnerID=40&md5=1480b72f8707be3f1324a4b748a2fc56	Univ Rennes, CNRS, ISCR [Institut des Sciences Chimiques de Rennes]–UMR 6226, Rennes, France; INRS-Institut Armand-Frappier, Laval, Canada; INAFQC, Canada; Université du Québec à Montréal, Chemistry Department, Montreal, Canada	Lambert de Malezieu, M., Univ Rennes, CNRS, ISCR [Institut des Sciences Chimiques de Rennes]–UMR 6226, Rennes, France, INRS-Institut Armand-Frappier, Laval, Canada, INAFQC, Canada; Courtel, P., Univ Rennes, CNRS, ISCR [Institut des Sciences Chimiques de Rennes]–UMR 6226, Rennes, France; Sleno, L., Université du Québec à Montréal, Chemistry Department, Montreal, Canada; Abasq, M.-L., Univ Rennes, …	Neuroprotection, neurodegenerative diseases; olive oil phenolic compounds; oxidative stress; superoxide anion radical, cyclic voltammetry
Lee J.C., Gray H.B., Winkler J.R.	Article	2005	Tertiary contact formation in α-synuclein probed by electron transfer	To explore tertiary contact formation in α-synuclein, a natively unfolded protein implicated in Parkinson's disease, we have measured the rates of reaction between a powerful electron donor, the tryptophan (W) triplet excited state, and an acceptor, 3-nitro-tyrosine (Y(NO2)) in six different variants, probing loop sizes between 15 and 132 residues. Electron transfer rates decrease with loop size …	1	1	English	PD, ET	Scopus	Journal of the American Chemical Society	127	47		16388	16389		10.1021/ja0561901	https://www.scopus.com/inward/record.uri?eid=2-s2.0-28444453293&doi=10.1021%2fja0561901&partnerID=40&md5=4ecae6b53b03531d390c6c53481a8080	Beckman Institute, California Institute of Technology, 1200 East California Boulevard, Pasadena, CA 91125-7400, United States	Lee, J.C., Beckman Institute, California Institute of Technology, 1200 East California Boulevard, Pasadena, CA 91125-7400, United States; Gray, H.B., Beckman Institute, California Institute of Technology, 1200 East California Boulevard, Pasadena, CA 91125-7400, United States; Winkler, J.R., Beckman Institute, California Institute of Technology, 1200 East California Boulevard, Pasadena, CA 91125-7…		alpha synuclein; biopolymer; tryptophan; absorption spectroscopy; article; beta sheet; diffusion coefficient; electron transport; energy transfer; excitation; kinetics; model; protein structure; alpha-Synuclein; Electrons; Fluorescence Resonance Energy Transfer; Kinetics; Mutation; Oxidation-Reduction
Lee J.C., Lai B.T., Kozak J.J., Gray H.B., Winkler J.R.	Article	2007	α-Synuclein tertiary contact dynamics	Tertiary contact formation rates in α-synuclein, an intrinsically disordered polypeptide implicated in Parkinson's disease, have been determined from measurements of diffusion-limited electron-transfer kinetics between triplet-excited tryptophan:3-nitrotyrosine pairs separated by 10, 12, 55, and 90 residues. Calculations based on a Markovian lattice model developed to describe intrachain diffusio…	1	1	English	PD a-synuclein, ET	Scopus	Journal of Physical Chemistry B	111	8		2107	2112		10.1021/jp068604y	https://www.scopus.com/inward/record.uri?eid=2-s2.0-33947364413&doi=10.1021%2fjp068604y&partnerID=40&md5=6aef794a0ef22ac51a80fd655bceafd5	Laboratory of Molecular Biophysics, National Heart, Lung, and Blood Institute, National Institutes of Health, 50 South Drive, Bethesda, MD 20892, United States; Beckman Institute, California Institute of Technology, 1200 East California Boulevard, Pasadena, CA 91125, United States; DePaul University, 243 South Wabash Avenue, Chicago, IL 60604-2301, United States	Lee, J.C., Laboratory of Molecular Biophysics, National Heart, Lung, and Blood Institute, National Institutes of Health, 50 South Drive, Bethesda, MD 20892, United States; Lai, B.T., Beckman Institute, California Institute of Technology, 1200 East California Boulevard, Pasadena, CA 91125, United States; Kozak, J.J., DePaul University, 243 South Wabash Avenue, Chicago, IL 60604-2301, United States…		Diffusion; Diseases; Polypeptides; Quenching; Electron-transfer kinetics; Intrachain diffusion; Markovian lattice model; Medical problems
Lenaz G., Baracca A., Barbero G., Bergamini C., Dalmonte M.E., Del Sole M., Faccioli M., Falasca A., Fato R., Genova M.L., Sgarbi G., Solaini G.	Review	2010	Mitochondrial respiratory chain super-complex I-III in physiology and pathology	Recent investigations by native gel electrophoresis showed the existence of supramolecular associations of the respiratory complexes, confirmed by electron microscopy analysis and single particle image processing. Flux control analysis demonstrated that Complex I and Complex III in mammalian mitochondria kinetically behave as a single unit with control coefficients approaching unity for each comp…	0	0	English	biochemistry, not related to PD	Scopus	Biochimica et Biophysica Acta - Bioenergetics	1797	6-7		633	640		10.1016/j.bbabio.2010.01.025	https://www.scopus.com/inward/record.uri?eid=2-s2.0-77953812609&doi=10.1016%2fj.bbabio.2010.01.025&partnerID=40&md5=a12a2a553156955ca11e54a78514eb1b	Dipartimento di Biochimica, Università di Bologna, Via Irnerio 48, 40126 Bologna, Italy; Dipartimento di Scienze Farmacologiche, Biologiche e Chimiche applicate, Università di Parma, V.le Usberti 27/A, 43100 Parma, Italy	Lenaz, G., Dipartimento di Biochimica, Università di Bologna, Via Irnerio 48, 40126 Bologna, Italy; Baracca, A., Dipartimento di Biochimica, Università di Bologna, Via Irnerio 48, 40126 Bologna, Italy; Barbero, G., Dipartimento di Biochimica, Università di Bologna, Via Irnerio 48, 40126 Bologna, Italy; Bergamini, C., Dipartimento di Biochimica, Università di Bologna, Via Irnerio 48, 40126 Bologna…	Channeling; Complex I; Flux control; Mitochondria; Super-complex	cytochrome c; cytochrome c oxidase; K ras protein; lipid; liposome; oxygen radical; phospholipid; reactive oxygen metabolite; reduced nicotinamide adenine dinucleotide; reduced nicotinamide adenine dinucleotide dehydrogenase; reduced nicotinamide adenine dinucleotide dehydrogenase (ubiquinone); ubidecarenone; ubiquinol cytochrome c reductase; antioxidant activity; bilayer membrane; binding site; …
Lenaz G., Fato R., Formiggini G., Genova M.L.	Reivew Article	2007	The role of Coenzyme Q in mitochondrial electron transport	In mitochondria, most Coenzyme Q is free in the lipid bilayer; the question as to whether tightly bound, non-exchangeable Coenzyme Q molecules exist in mitochondrial complexes is still an open question. We review the mechanism of inter-complex electron transfer mediated by ubiquinone and discuss the kinetic consequences of the supramolecular organization of the respiratory complexes (randomly dis…	2	1	English	ET, biochemistry, no PD, complex I, NO STM	Scopus	Mitochondrion	7	SUPPL.		S8	S33		10.1016/j.mito.2007.03.009	https://www.scopus.com/inward/record.uri?eid=2-s2.0-34248220431&doi=10.1016%2fj.mito.2007.03.009&partnerID=40&md5=aa06dc8f92cdfcde6ec18ddb05a9b31b	Dipartimento di Biochimica, Università di Bologna, Via Irnerio 48, 40126 Bologna, Italy	Lenaz, G., Dipartimento di Biochimica, Università di Bologna, Via Irnerio 48, 40126 Bologna, Italy; Fato, R., Dipartimento di Biochimica, Università di Bologna, Via Irnerio 48, 40126 Bologna, Italy; Formiggini, G., Dipartimento di Biochimica, Università di Bologna, Via Irnerio 48, 40126 Bologna, Italy; Genova, M.L., Dipartimento di Biochimica, Università di Bologna, Via Irnerio 48, 40126 Bologna,…	Channeling; Coenzyme Q; Complex I; Mitochondrial respiratory chain; Pool behaviour; Super-complex	adenine nucleotide translocase; choline dehydrogenase; cytochrome c oxidase; dihydroorotate dehydrogenase; electron transferring flavoprotein; glycerol 3 phosphate dehydrogenase; idebenone; insecticide; iron sulfur protein; mitochondrial DNA; n methyl dextro aspartic acid receptor; oxoglutarate dehydrogenase; pesticide; proton transporting adenosine triphosphate synthase; reactive oxygen metaboli…
Lenaz G., Genova M.L.	Review	2009	Structural and functional organization of the mitochondrial respiratory chain: A dynamic super-assembly	The structural organization of the mitochondrial oxidative phosphorylation (OXPHOS) system has received large attention in the past and most investigations led to the conclusion that the respiratory enzymatic complexes are randomly dispersed in the lipid bilayer of the inner membrane and functionally connected by fast diffusion of smaller redox components, Coenzyme Q and cytochrome c. More recent…	0	0	English	biochemistry, not related to PD	Scopus	International Journal of Biochemistry and Cell Biology	41	10		1750	1772		10.1016/j.biocel.2009.04.003	https://www.scopus.com/inward/record.uri?eid=2-s2.0-68949107623&doi=10.1016%2fj.biocel.2009.04.003&partnerID=40&md5=6663ec4ca22c2ceb24d592c2664c84db	Dipartimento di Biochimica G. Moruzzi, Università di Bologna, Via Irnerio 48, 40126 Bologna, Italy	Lenaz, G., Dipartimento di Biochimica G. Moruzzi, Università di Bologna, Via Irnerio 48, 40126 Bologna, Italy; Genova, M.L., Dipartimento di Biochimica G. Moruzzi, Università di Bologna, Via Irnerio 48, 40126 Bologna, Italy	Channelling; Cytochrome c; Respiratory chain; Supercomplexes; Ubiquinone	cytochrome c; oxygen radical; reactive oxygen metabolite; reduced nicotinamide adenine dinucleotide dehydrogenase (ubiquinone); ubidecarenone; ubiquinone; biogenesis; drug mechanism; electron microscopy; electron transport; enzyme deficiency; enzyme stability; Friedreich ataxia; gel electrophoresis; heart failure; human; image processing; lipid bilayer; lipid composition; mammal; membrane potenti…
Lenaz G; Baracca A; Fato R; Genova ML; Solaini G	Review	2006	Mitochondrial Complex I: structure, function, and implications in neurodegeneration.	Mitochondrial Complex I (NADH Coenzyme Q oxidoreductase) is the least understood of respiratory complexes. In this review we emphasize some novel findings on this enzyme that are of relevance to the pathogenesis of neurodegenerative diseases. Besides Coenzyme Q (CoQ), also oxygen may be an electron acceptor from the enzyme, with generation of superoxide radical in the mitochondrial matrix. The si…	1	0	English	biochemistry	EBSCOhost MEDLINE	The Italian journal of biochemistry	55	3-4		232							Electron Transport Complex I chemistry; Electron Transport Complex I physiology; Neurodegenerative Diseases etiology; Animals; Coenzymes; Electron Transport physiology; Electron Transport Complex I antagonists & inhibitors; Flavin Mononucleotide physiology; Humans; Iron-Sulfur Proteins physiology; Mitochondrial Myopathies genetics; Mitochondrial Myopathies physiopathology; Models, Biological; Mod…
Liu J., Litt L., Segal M.R., Kelly M.J.S., Pelton J.G., Kim M.	Review	2011	Metabolomics of oxidative stress in recent studies of Endogenous and exogenously administered intermediate metabolites	Aerobic metabolism occurs in a background of oxygen radicals and reactive oxygen species (ROS) that originate from the incomplete reduction of molecular oxygen in electron transfer reactions. The essential role of aerobic metabolism, the generation and consumption of ATP and other high energy phosphates, sustains a balance of approximately 3000 essential human metabolites that serve not only as n…	0	1	English	biochemistry, ROS, no PD	Scopus	International Journal of Molecular Sciences	12	10		6469	6501		10.3390/ijms12106469	https://www.scopus.com/inward/record.uri?eid=2-s2.0-80055034402&doi=10.3390%2fijms12106469&partnerID=40&md5=f61a187930ae2a2a4141c46c14138a18	Department of Anesthesia, University of California, San Francisco, CA 94143, United States; Department of Epidemiology and Biostatistics, University of California, San Francisco, CA 94143, United States; Department of Pharmaceutical Chemistry, University of California, San Francisco, CA 94143, United States; Physical Biosciences Division, Lawrence Berkeley National Laboratory, Berkeley, CA 94720,…	Liu, J., Department of Anesthesia, University of California, San Francisco, CA 94143, United States; Litt, L., Department of Anesthesia, University of California, San Francisco, CA 94143, United States; Segal, M.R., Department of Epidemiology and Biostatistics, University of California, San Francisco, CA 94143, United States; Kelly, M.J.S., Department of Pharmaceutical Chemistry, University of Ca…	Brain; Chemometrics; Heart; Kidney; Liver; Metabolomics; Metabonomics; Multivariate analysis; NMR; Oxidative stress; Principal component analysis; Proteomics; Targeted profiling; Transcriptionomics	adenosine triphosphate; fructose 1,6 bisphosphate; pyruvic acid; pyruvic acid derivative; pyruvic acid ethyl ester; reactive oxygen metabolite; unclassified drug; pyruvic acid derivative; reactive oxygen metabolite; aerobic metabolism; antioxidant activity; biomics; brain ischemia; chemometrics; clinical trial (topic); cytosol; detoxification; diabetes mellitus; disease association; drug mechanis…
Liu Y., Fiskum G., Schubert D.	Article	2002	Generation of reactive oxygen species by the mitochondrial electron transport chain	Generation of reactive oxygen species (ROS) by the mitochondrial electron transport chain (ETC), which is composed of four multiprotein complexes named complex I-IV, is believed to be important in the aging process and in the pathogenesis of neurodegenerative diseases such as Parkinson's disease. Previous studies have identified the ubiquinone of complex III and an unknown component of complex I …	2	1	English	biochemistry, ROS	Scopus	Journal of Neurochemistry	80	5		780	787		10.1046/j.0022-3042.2002.00744.x	https://www.scopus.com/inward/record.uri?eid=2-s2.0-0036319021&doi=10.1046%2fj.0022-3042.2002.00744.x&partnerID=40&md5=107e692adab0346d6e61b8b10e9544f9	Cellular Neurobiology Laboratory, Salk Institute for Biological Studies, San Diego, CA, United States; Department of Anesthesiology, University of Maryland, School of Medicine, Baltimore, MD, United States; Cellular Neurobiology Laboratory, Salk Institute for Biological Studies, 10010 N. Torrey Pines Road, San Diego, CA 92037-9062, United States	Liu, Y., Cellular Neurobiology Laboratory, Salk Institute for Biological Studies, San Diego, CA, United States, Cellular Neurobiology Laboratory, Salk Institute for Biological Studies, 10010 N. Torrey Pines Road, San Diego, CA 92037-9062, United States; Fiskum, G., Department of Anesthesiology, University of Maryland, School of Medicine, Baltimore, MD, United States; Schubert, D., Cellular Neurob…	Aging; Electron transport chain; Mitochondria; Parkinson's disease; Reactive oxygen species	flavine mononucleotide; hydrogen peroxide; protein; reactive oxygen metabolite; reduced nicotinamide adenine dinucleotide phosphate; succinic acid; superoxide; ubiquinone; aging; animal tissue; article; electron transport; fluorescence; mitochondrion; nonhuman; Parkinson disease; priority journal; rat; Aging; Animals; Brain Chemistry; Electron Transport; Electron Transport Complex I; Electron Tra…
Lloyd R.V.	Article	1995	Mechanism of the Manganese-Catalyzed Autoxidation of Dopamine	Manganese is an essential trace element for human metabolism, but at higher concentrations it is a potent neurotoxin that presents clinical symptoms similar to those of Parkinson's disease. Since the toxicity of manganese may be related to its ability to accelerate the oxidation of catecholamines, we have examined the effect of aqueous Mn2+ on the formation and decay of the dopamine semiquinone r…	0	1	English	manganese neurotoxicity, ESR, no DNA	Scopus	Chemical Research in Toxicology	8	1		111	116		10.1021/tx00043a015	https://www.scopus.com/inward/record.uri?eid=2-s2.0-0028870184&doi=10.1021%2ftx00043a015&partnerID=40&md5=ff00a1551c89410e218a260737e52c74	Department of Chemistry, University of Memphis, Memphis Tennessee 38152, United States	Lloyd, R.V., Department of Chemistry, University of Memphis, Memphis Tennessee 38152, United States		catecholamine; dopamine; manganese; neurotoxin; oxygen; article; autooxidation; electron spin resonance; electron transport; neurotoxicity; oxidation reduction reaction; parkinson disease; ph; Benzoquinones; Dopamine; Electron Spin Resonance Spectroscopy; Manganese; Oxidation-Reduction
Lu J., Holmgren A.	Review	2014	The thioredoxin superfamily in oxidative protein folding	Significance: The thioredoxin (Trx) superfamily proteins, including protein disulfide isomerases (PDI) and Dsb protein family, are major players in oxidative protein folding, which involves native disulfide bond formation. These proteins contain Trx folds with CXXC active sites and fulfill their physiological functions in oxidative cellular compartments such as the endoplasmic reticulum (ER) or t…	0	1	English	biochemistry, protein misfolding	Scopus	Antioxidants and Redox Signaling	21	3		457	470		10.1089/ars.2014.5849	https://www.scopus.com/inward/record.uri?eid=2-s2.0-84903784187&doi=10.1089%2fars.2014.5849&partnerID=40&md5=27e6a2e749c28a9b86489f3ece9f8fff	Department of Medical Biochemistry and Biophysics, Karolinska Institutet, Stockholm SE-171 77, Sweden	Lu, J., Department of Medical Biochemistry and Biophysics, Karolinska Institutet, Stockholm SE-171 77, Sweden; Holmgren, A., Department of Medical Biochemistry and Biophysics, Karolinska Institutet, Stockholm SE-171 77, Sweden		protein disulfide isomerase; thioredoxin; vitamin K epoxide reductase; protein disulfide isomerase; thiol derivative; thioredoxin; aging; Alzheimer disease; atomic force microscopy; bacterial infection; cytoplasm; disulfide bond; electron transport; endoplasmic reticulum stress; human; intracellular space; mammal cell; nitrosylation; nonhuman; oxidation reduction potential; oxidative stress; Park…
Lu Q., Chen X., Liu D., Wu C., Liu M., Li H., Zhang Y., Yao S.	Article	2018	Synergistic electron transfer effect-based signal amplification strategy for the ultrasensitive detection of dopamine	The selective and sensitive detection of dopamine (DA) is of great significance for the identification of schizophrenia, Huntington's disease, and Parkinson's disease from the perspective of molecular diagnostics. So far, most of DA fluorescence sensors are based on the electron transfer from the fluorescence nanomaterials to DA-quinone. However, the limited electron transfer ability of the DA-qu…	0	0	English	Dopamine (DA) sensor nanoparticle, not DNA	Scopus	Talanta	182			428	432		10.1016/j.talanta.2018.01.068	https://www.scopus.com/inward/record.uri?eid=2-s2.0-85041751047&doi=10.1016%2fj.talanta.2018.01.068&partnerID=40&md5=8c2a549d88721de0f9c107f1a82b83e2	Key Laboratory of Chemical Biology and Traditional Chinese Medicine Research (Ministry of Education), College of Chemistry and Chemical Engineering, Hunan Normal University, Changsha, 410081, China; State Key Laboratory of Developmental Biology of Freshwater Fish, College of Life Science, Hunan Normal University, Changsha, 410081, China	Lu, Q., Key Laboratory of Chemical Biology and Traditional Chinese Medicine Research (Ministry of Education), College of Chemistry and Chemical Engineering, Hunan Normal University, Changsha, 410081, China, State Key Laboratory of Developmental Biology of Freshwater Fish, College of Life Science, Hunan Normal University, Changsha, 410081, China; Chen, X., Key Laboratory of Chemical Biology and Tr…	Dopamine; Electron transfer; Fluorescence sensor; Signal amplification; Silver nanoparticles	Amines; Diagnosis; Fluorescence; Neurodegenerative diseases; Neurophysiology; Signal processing; Silver nanoparticles; Detection sensitivity; Dopamine; Electron transfer; Electron transfer effects; Fluorescence sensors; Signal amplifications; Silicon nanoparticles; Ultrasensitive detection; Electron transitions; dopamine; dopamine quinone; metal nanoparticle; silicon; silver; analogs and derivati…
Ma W., Qin L.-X., Liu F.-T., Gu Z., Wang J., Pan Z.G., James T.D., Long Y.-T.	Article	2013	Ubiquinone-quantum dot bioconjugates for in vitro and intracellular complex i sensing	Quantum dots (QDs) have attracted increasing interest in bioimaging and sensing. Here, we report a biosensor of complex I using ubiquinone-terminated disulphides with different alkyl spacers (Qn NS, n = 2, 5 and 10) as surface-capping ligands to functionalise CdSe/ZnS QDs. The enhancement or quenching of the QD bioconjugates fluorescence changes as a function of the redox state of Qn NS, since QD…	2	1	English	quantum dot (QD), ET, complex I, mitochondrial respiratory, no PD related	Scopus	Scientific Reports	3		1537				10.1038/srep01537	https://www.scopus.com/inward/record.uri?eid=2-s2.0-84875796877&doi=10.1038%2fsrep01537&partnerID=40&md5=ea2eab491c004a623279d546a38cd7f6	State Key Laboratory of Bioreactor Engineering, Department of Chemistry, East China University of Science and Technology, 130 Meilong Road, Shanghai, 200237, China; Department of Neurology, Huashan Hospital Affiliated, Fudan University, 12 Wulumuqi Zhong Road, Shanghai, 200040, China; Department of Medicine, Zhongshan Hospital Affiliated, Fudan University, 180 Fenglin Road, Shanghai, 200032, Chin…	Ma, W., State Key Laboratory of Bioreactor Engineering, Department of Chemistry, East China University of Science and Technology, 130 Meilong Road, Shanghai, 200237, China; Qin, L.-X., State Key Laboratory of Bioreactor Engineering, Department of Chemistry, East China University of Science and Technology, 130 Meilong Road, Shanghai, 200237, China; Liu, F.-T., Department of Neurology, Huashan Hosp…		cadmium; nicotinamide adenine dinucleotide; quantum dot; reduced nicotinamide adenine dinucleotide dehydrogenase (ubiquinone); selenium; ubiquinone; zinc; article; breathing; chemistry; electrochemical analysis; electron transport; genetic procedures; human; metabolism; mitochondrion; oxidation reduction reaction; Parkinson disease; Biosensing Techniques; Cadmium; Electrochemical Techniques; Elec…
Maeda Y., Matsumoto T., Kawai T.	Article	2011	Imaging of transverse electron transfer through a DNA molecule by simultaneous scanning tunneling and frequency-modulation atomic force microscopy	Simultaneous scanning tunneling and frequency-modulation atomic force microscopy (STM/FM-AFM) was applied to a DNA molecule on a Cu(111) surface to analyze transverse electron transfer which is related to the electron transfer and the electrical contact in DNA-based devices. In particular, we demonstrated correlation mapping of the electron transfer parameters by visualizing specific combinations…	2	1	English	Not related to STM (used AFM)	Scopus	ACS Nano	5	4		3141	3145		10.1021/nn200291f	https://www.scopus.com/inward/record.uri?eid=2-s2.0-79955426369&doi=10.1021%2fnn200291f&partnerID=40&md5=54ad972b00b9f2e7637ea9b954decdde	Research Institute for Ubiquitous Energy Devices, National Institute of Advanced Industrial Science and Technology (AIST), 1-8-31, Midorigaoka, Ikeda, Osaka 563-8577, Japan; Institute of Scientific and Industrial Research (ISIR), Osaka University, 8-1 Mihogaoka, Ibaraki, Osaka 567-0047, Japan	Maeda, Y., Research Institute for Ubiquitous Energy Devices, National Institute of Advanced Industrial Science and Technology (AIST), 1-8-31, Midorigaoka, Ikeda, Osaka 563-8577, Japan, Institute of Scientific and Industrial Research (ISIR), Osaka University, 8-1 Mihogaoka, Ibaraki, Osaka 567-0047, Japan; Matsumoto, T., Institute of Scientific and Industrial Research (ISIR), Osaka University, 8-1 …	decay constant; DNA; electron transfer; frequency-modulation atomic force microscopy; scanning tunneling microscopy	AFM; Conjugated molecules; Contact conductance; Correlation mapping; Cu(1 1 1); Decay constants; DNA molecules; DNA strands; Electrical contacts; electron transfer; frequency-modulation atomic force microscopy; Quantitative analysis; Spatial variations; DNA; Electron transitions; Modulation; Molecules; Nucleic acids; Scanning; Scanning tunneling microscopy; Atomic force microscopy
Mahdinia E., Demirci A., Berenjian A.	Review	2019	Biofilm reactors as a promising method for vitamin K (menaquinone-7) production	Menaquinone-7 (MK-7) is the most potent subtype of vitamin K with extraordinarily high half-life in the circulatory system. Therefore, MK-7 plays a critical role in promoting human wellbeing today. Studies on MK-7 every year show more and more magnificent benefits of it in preventing cardiovascular diseases and osteoporosis to battling cancer cells, Alzheimer’s and Parkinson’s diseases. Thus, it …	0	1	English	not related to PD	Scopus	Applied Microbiology and Biotechnology	103	14		5583	5592		10.1007/s00253-019-09913-w	https://www.scopus.com/inward/record.uri?eid=2-s2.0-85066601683&doi=10.1007%2fs00253-019-09913-w&partnerID=40&md5=78401994ebbe718f9aa61c6da557a588	Department of Agricultural and Biological Engineering, The Pennsylvania State University, State College, PA, United States; The Huck Institutes of Life Sciences, The Pennsylvania State University, University Park, PA 16802, United States; Faculty of Science and Engineering, The University of Waikato, Hamilton, 3240, New Zealand	Mahdinia, E., Department of Agricultural and Biological Engineering, The Pennsylvania State University, State College, PA, United States; Demirci, A., Department of Agricultural and Biological Engineering, The Pennsylvania State University, State College, PA, United States, The Huck Institutes of Life Sciences, The Pennsylvania State University, University Park, PA 16802, United States; Berenjian…	Agitated bioreactors; Bacillus; Biofilm reactors; Menaquinone-7; Microbial fermentation; MK-7; vitamin K	Bacilli; Bacteriology; Bioactivity; Bioreactors; Cardiovascular system; Diseases; Fermentation; Functional polymers; Mass transfer; Plants (botany); Agitated bioreactors; BIofilm reactors; Menaquinone-7; Microbial fermentation; MK-7; Vitamin K; Biofilms; menaquinone; menaquinone 7; unclassified drug; farnoquinone; glucose; vitamin MK 7; bacterium; biofilm; bioreactor; chemical compound; fermentat…
Marcélis L., Moucheron C., Mesmaeker A.K.-D.	Review	2013	Ru-TAP complexes and DNA: From photo-induced electron transfer to gene photo-silencing in living cells	In this review, examples of applications of the photoinduced electron transfer (PET) process between photo-oxidizing Ru-TAP (TAP=1,4,5,8- tetraazaphenanthrene) complexes and DNA or oligodeoxynucleotides (ODNs) are discussed. Applications using a free Ru-TAP complex (not chemically anchored to an ODN) are first considered. In this case, the PET gives rise to the production of an irreversible adduc…	0	1	English	not related to PD	Scopus	Philosophical Transactions of the Royal Society A: Mathematical, Physical and Engineering Sciences	371	1995					10.1098/rsta.2012.0131	https://www.scopus.com/inward/record.uri?eid=2-s2.0-84887394419&doi=10.1098%2frsta.2012.0131&partnerID=40&md5=b566c6ad51a0c6cff022a3997d04c3ab	Chimie Organique et Photochimie, Université Libre de Bruxelles, 50 Avenue F.D. Roosevelt, 1050 Bruxelles, Belgium	Marcélis, L., Chimie Organique et Photochimie, Université Libre de Bruxelles, 50 Avenue F.D. Roosevelt, 1050 Bruxelles, Belgium; Moucheron, C., Chimie Organique et Photochimie, Université Libre de Bruxelles, 50 Avenue F.D. Roosevelt, 1050 Bruxelles, Belgium; Mesmaeker, A.K.-D., Chimie Organique et Photochimie, Université Libre de Bruxelles, 50 Avenue F.D. Roosevelt, 1050 Bruxelles, Belgium	DNA; Electron transfer; Oligonucleotides; Photo-cross-linking; Photochemistry; Ruthenium complexes	DNA; Electron transitions; Electrophoresis; Genes; Mass spectrometry; Oligonucleotides; Photochemical reactions; Scanning tunneling microscopy; Complementary sequences; Electron transfer; Human papillomavirus; Oligodeoxynucleotides; Photo-induced electron transfer; Photocross-linking; Polyacrylamide gel electrophoresis; Ruthenium complexes; Ruthenium compounds; DNA; oligonucleotide; photosensitiz…
McEwen G.D., Chen F., Zhou A.	Article	2009	Immobilization, hybridization, and oxidation of synthetic DNA on gold surface: Electron transfer investigated by electrochemistry and scanning tunneling microscopy	Fundamental understanding of interfacial electron transfer (ET) among electrolyte/DNA/solid-surface will facilitate the design for electrical detection of DNA molecules. In this report, the electron transfer characteristics of synthetic DNA (sequence from pathogenic Cryptosporidium parvum) self-assembled on a gold surface was electrochemically studied. The effects of immobilization order on the i…	1	1	English	electrical detection of DNA, STM	Scopus	Analytica Chimica Acta	643	1-2		26	37		10.1016/j.aca.2009.03.050	https://www.scopus.com/inward/record.uri?eid=2-s2.0-65549130044&doi=10.1016%2fj.aca.2009.03.050&partnerID=40&md5=f8b911f9e7a9caf6fb195b94e9e06ebb	Biological Engineering Program, Department of Biological and Irrigation Engineering, Utah State University, 4105 Old Main Hill, Logan, UT 84322-4105, United States	McEwen, G.D., Biological Engineering Program, Department of Biological and Irrigation Engineering, Utah State University, 4105 Old Main Hill, Logan, UT 84322-4105, United States; Chen, F., Biological Engineering Program, Department of Biological and Irrigation Engineering, Utah State University, 4105 Old Main Hill, Logan, UT 84322-4105, United States; Zhou, A., Biological Engineering Program, Dep…	DNA immobilization; DNA oxidative damage; Electron transfer; Gold electrode; Hoechst 33258; Scanning tunneling microscopy	Alternative approaches; Cryptosporidium parvum; Diffusion coefficients; DNA hybridizations; DNA immobilization; DNA molecules; Dna surfaces; Electrical detections; Electro oxidations; Electrochemical-impedance spectroscopies; Electron transfer; Electron transfer mechanisms; Gold electrode; Gold surfaces; Hoechst 33258; Interfacial electron transfers; Monolayer thickness; Self-assembled; Surface c…
Mena NP; Bulteau AL; Salazar J; Hirsch EC; Núñez MT	Journal Article	2011	Effect of mitochondrial complex I inhibition on Fe-S cluster protein activity.	Iron-sulfur (Fe-S) clusters are small inorganic cofactors formed by tetrahedral coordination of iron atoms with sulfur groups. Present in numerous proteins, these clusters are involved in key biological processes such as electron transfer, metabolic and regulatory processes, DNA synthesis and repair and protein structure stabilization. Fe-S clusters are synthesized mainly in the mitochondrion, wh…	0	0	English	no DNA	EBSCOhost MEDLINE	Biochemical and biophysical research communications	409	2		241			10.1016/j.bbrc.2011.04.137				Electron Transport Complex I antagonists & inhibitors; Iron Regulatory Protein 1 metabolism; Iron-Sulfur Proteins metabolism; Mitochondria enzymology; Aconitate Hydratase metabolism; Cell Line, Tumor; Cytosol enzymology; Humans; Rotenone pharmacology
Michalak S., Florczak-Wyspiańska J., Rybacka-Mossakowska J., Ambrosius W., Osztynowicz K., Baszczuk A., Kozubski W., Wysocka E.	Article	2017	Mitochondrial Respiration in Intact Peripheral Blood Mononuclear Cells and Sirtuin 3 Activity in Patients with Movement Disorders	Objective. Mitochondrial dysfunction is considered a unifying pathophysiological explanation for movement disorders. Sirtuin 3 (SIRT3) exhibits deacetylase activity and antioxidant properties. The aim of the study was to analyze the mitochondrial respiration in peripheral blood mononuclear cells (PBMCs) and the SIRT3 activity in patients with movement disorders. Methods. Mitochondrial respiration…	0	0	English	PD but not DNA study	Scopus	Oxidative Medicine and Cellular Longevity	2017		9703574				10.1155/2017/9703574	https://www.scopus.com/inward/record.uri?eid=2-s2.0-85030628961&doi=10.1155%2f2017%2f9703574&partnerID=40&md5=01f49d8e2aaea933a0c352fbcdcfe84e	Department of Neurochemistry and Neuropathology, Poznan University of Medical Sciences, Przybyszewskiego str. 49, Poznan, 60-355, Poland; Department of Neurology, Poznan University of Medical Sciences, Przybyszewskiego str. 49, Poznan, 60-355, Poland; Department of Laboratory Diagnostics, Poznan University of Medical Sciences, Szamarzewskiego str. 82/84, Poznan, 60-569, Poland	Michalak, S., Department of Neurochemistry and Neuropathology, Poznan University of Medical Sciences, Przybyszewskiego str. 49, Poznan, 60-355, Poland; Florczak-Wyspiańska, J., Department of Neurology, Poznan University of Medical Sciences, Przybyszewskiego str. 49, Poznan, 60-355, Poland; Rybacka-Mossakowska, J., Department of Neurochemistry and Neuropathology, Poznan University of Medical Scien…		Blood; Oxygen; Ultrasonics; Antioxidant properties; Deacetylase activity; Mitochondrial dysfunction; Mitochondrial respiration; Movement disorders; Pathophysiological; Peripheral blood mononuclear cells; Ultrasound measurement; Diseases; oxygen; sirtuin 3; sirtuin 3; adult; Article; controlled study; corticobasal degeneration; diffuse Lewy body disease; echography; electron transport; enzyme acti…
Mizuno Y; Ikebe S; Hattori N; Nakagawa-Hattori Y; Mochizuki H; Tanaka M; Ozawa T	Comparative Study	1995	Role of mitochondria in the etiology and pathogenesis of Parkinson's disease.	We discuss the etiology and pathogenesis of Parkinson's disease (PD). Our group and others have found a decrease in complex I of the mitochondrial electron transfer complex in the substantia nigra of patients with PD; in addition, we reported loss of the alpha-ketoglutarate dehydrogenase complex (KGDHC) in the substantia nigra. Dual loss of complex I and the KGDHC will deleteriously affect the el…	1	1	English		EBSCOhost MEDLINE	Biochimica et biophysica acta	1271	1		265			10.1016/0925-4439(95)00038-6				DNA, Mitochondrial metabolism; Mitochondria metabolism; Parkinson Disease metabolism; 1-Methyl-4-phenyl-1,2,3,6-tetrahydropyridine; Animals; Brain metabolism; Citric Acid Cycle; DNA, Mitochondrial genetics; Electron Transport; Free Radicals metabolism; Glutathione metabolism; Humans; Ketoglutarate Dehydrogenase Complex metabolism; Models, Biological; NAD(P)H Dehydrogenase (Quinone) metabolism; Ne…
Mizuno, Yoshikuni Ikebe, Shin-ichirou Hattori, Nobutaka Mochizuki, Hideki Nakagawa-Hattori, Yuko Kondo, Tomoyoshi	Review	1994	Studies on the pathogenesis of Parkinson's disease in Japan	Studies on the pathogenesis of nigral cell death in Parkinson's disease (PD) are reviewed. Discussions are focussd mainly on studies performed by Japanese investigators because of the purpose of this issue. We and other groups found a decrease in complex I of the mitochondrial electron transfer complex in the substantia nigra of patients with PD, and in addition to complex I deficiency, we report…	1	1	English	pathogenesis, genetic	Sciencedirect	Archives of Gerontology and Geriatrics	19	2		105-121			https://doi.org/10.1016/0167-4943(94)90033-7	https://www.sciencedirect.com/science/article/pii/0167494394900337			Etiology Mitochondria Oxidative stress Parkinson's disease
Morikawa N., Nakagawa-Hattori Y., Mizuno Y.	Article	1996	Effect of dopamine, dimethoxyphenylethylamine, papaverine, and related compounds on mitochondrial respiration and complex I activity	We report the effect of papaverine, tetrahydropapaverine, laudanosine, dimethoxyphenylethylamine, dopamine, and its metabolites on mitochondrial respiration and activities of the enzymes in the electron transfer complexes, as mitochondrial toxins may be implicated in the etiology and the pathogenesis of Parkinson's disease. Papaverine was the most potent inhibitor of complex I and NADH-linked mit…	2	1	English	PD, drug, biochemistry, no STM	Scopus	Journal of Neurochemistry	66	3		1174	1181		10.1046/j.1471-4159.1996.66031174.x	https://www.scopus.com/inward/record.uri?eid=2-s2.0-0030051311&doi=10.1046%2fj.1471-4159.1996.66031174.x&partnerID=40&md5=ab1483f9c5dec342341b20709ed526a5	Department of Neurology, Juntendo University, School of Medicine, Tokyo, Japan; Department of Neurology, Juntendo University, School of Medicine, 2-1-1 Hongo, Bunkyo, Tokyo 113, Japan	Morikawa, N., Department of Neurology, Juntendo University, School of Medicine, Tokyo, Japan; Nakagawa-Hattori, Y., Department of Neurology, Juntendo University, School of Medicine, Tokyo, Japan; Mizuno, Y., Department of Neurology, Juntendo University, School of Medicine, Tokyo, Japan, Department of Neurology, Juntendo University, School of Medicine, 2-1-1 Hongo, Bunkyo, Tokyo 113, Japan	Complex I; Dopamine; Mitochondria; Papaverine; Parkinson's disease; Tetrahydroisoquinolines	dopamine; homoveratrylamine; laudanosine; papaverine; reduced nicotinamide adenine dinucleotide; reduced nicotinamide adenine dinucleotide dehydrogenase (ubiquinone); rotenone; tetrahydropapaverine; animal cell; article; brain mitochondrion; controlled study; electron transport; enzyme inhibition; male; mitochondrial respiration; mouse; neurotoxicity; nonhuman; oxidative stress; Parkinson disease…
Morikawa N., Naoi M., Maruyama W., Ohta S., Kotake Y., Kawai H., Niwa T., Dostert P., Mizuno Y.	Article	1998	Effects of various tetrahydroisoquinoline derivatives on mitochondrial respiration and the electron transfer complexes	We report effect of various tetrahydroisoquinoline derivatives on mitochondrial respiration and the electron transfer complexes. Generally these compounds were potent inhibitors of NADH-linked mitochondrial state 3 respiration and complex I. Presence of a phenyl group at the C1 position or oxidation of N-methylated isoquinones into N-methylisoquinolinium ion augmented the potency to inhibit mitoc…	1	1	English	PD, neuroscience, biochemistry	Scopus	Journal of Neural Transmission	105	6-7		677	688		10.1007/s007020050087	https://www.scopus.com/inward/record.uri?eid=2-s2.0-0031706179&doi=10.1007%2fs007020050087&partnerID=40&md5=6da189e122362a36f2046cea6f176f97	Department of Neurology, Juntendo University, School of Medicine, Tokyo, Japan; Department of Biosciences, Nagoya Institute of Technology, Nagoya, Japan; Lab. of Biochemistry and Metabolism, Department of Basic Gerontology, Natl. Inst. for Longevity Sciences, Obu, Japan; Dept. of Bioorg. and Med. Chemistry, Faculty of Pharmaceutical Sciences, University of Tokyo, Tokyo, Japan; Department of Inter…	Morikawa, N., Department of Neurology, Juntendo University, School of Medicine, Tokyo, Japan; Naoi, M., Department of Biosciences, Nagoya Institute of Technology, Nagoya, Japan; Maruyama, W., Lab. of Biochemistry and Metabolism, Department of Basic Gerontology, Natl. Inst. for Longevity Sciences, Obu, Japan; Ohta, S., Dept. of Bioorg. and Med. Chemistry, Faculty of Pharmaceutical Sciences, Univer…	Complex I; Mitochondria; Neurotoxins; Parkinson's disease; Pathogenesis; Tetrahydroisoquinolines	reduced nicotinamide adenine dinucleotide; tetrahydroisoquinoline derivative; animal tissue; article; controlled study; electron transport; male; mitochondrial respiration; mouse; nonhuman; oxidative stress; Parkinson disease; priority journal
Morré D.J., Morré D.M.	Review	2011	Non-mitochondrial coenzyme Q	The key role of coenzyme Q (ubiquinone or Q) is in mitochondrial and prokaryotic energetics. Less well investigated is the basis for its presence in eukaryotic membrane locations other than mitochondria and in plasma where both antioxidant and potentially more targeted roles are indicated. Included in the latter is that of a lipid-soluble electron transfer intermediate that serves as the transmem…	0	0	English	biochemistry, not related to PD	Scopus	BioFactors	37	5		355	360		10.1002/biof.156	https://www.scopus.com/inward/record.uri?eid=2-s2.0-80054870971&doi=10.1002%2fbiof.156&partnerID=40&md5=6e88050a165eee3d2dbee10618152094	NOX Technologies, Purdue Research Park, West Lafayette, IN, United States	Morré, D.J., NOX Technologies, Purdue Research Park, West Lafayette, IN, United States; Morré, D.M., NOX Technologies, Purdue Research Park, West Lafayette, IN, United States	ArNOX; Cell growth; Coenzyme Q 10; Endoplasmic reticulum; ENOX proteins; Golgi apparatus; Plasma membrane	alpha tocopherol; capsaicin; cytochrome b5 reductase; dicoumarol; epigallocatechin gallate; extracellular superoxide dismutase; lipoprotein; low density lipoprotein; prasterone; reduced nicotinamide adenine dinucleotide; reduced nicotinamide adenine dinucleotide (phosphate) dehydrogenase (quinone); reduced nicotinamide adenine dinucleotide dehydrogenase; reduced nicotinamide adenine dinucleotide …
Mukherjee S., Kapp E.A., Lothian A., Roberts A.M., Vasil'Ev Y.V., Boughton B.A., Barnham K.J., Kok W.M., Hutton C.A., Masters C.L., Bush A.I., Beckman J.S., Dey S.G., Roberts B.R.	Article	2017	Characterization and Identification of Dityrosine Cross-Linked Peptides Using Tandem Mass Spectrometry	The use of mass spectrometry coupled with chemical cross-linking of proteins has become a powerful tool for proteins structure and interactions studies. Unlike structural analysis of proteins using chemical reagents specific for lysine or cysteine residues, identification of gas-phase fragmentation patterns of endogenous dityrosine cross-linked peptides have not been investigated. Dityrosine cros…	0	1	English	mass spectroscopy	Scopus	Analytical Chemistry	89	11		6136	6145		10.1021/acs.analchem.7b00941	https://www.scopus.com/inward/record.uri?eid=2-s2.0-85020875095&doi=10.1021%2facs.analchem.7b00941&partnerID=40&md5=390e8b8782f6175e100f40eee491c283	Florey Institute of Neuroscience and Mental Health, University of Melbourne, 30 Royal Parade, Parkville, VIC 3052, Australia; Department of Inorganic Chemistry, Indian Association for the Cultivation of Science, Jadavpur, Kolkata, 700032, India; Cooperative Research Centre for Mental Health, Parkville, VIC 3052, Australia; Linus Pauling Institute, Department of Biochemistry and Biophysics, Oregon…	Mukherjee, S., Florey Institute of Neuroscience and Mental Health, University of Melbourne, 30 Royal Parade, Parkville, VIC 3052, Australia, Department of Inorganic Chemistry, Indian Association for the Cultivation of Science, Jadavpur, Kolkata, 700032, India; Kapp, E.A., Florey Institute of Neuroscience and Mental Health, University of Melbourne, 30 Royal Parade, Parkville, VIC 3052, Australia, …		Amino acids; Chemical analysis; Crosslinking; Dimers; Dissociation; Mass spectrometry; Neurodegenerative diseases; Peptides; Spectrometry; Collision induced dissociation; Electron capture dissociation; Electron-transfer dissociation; ESI tandem mass spectrometry; Gas-phase fragmentation; Pathological conditions; Post-translation modification; Tandem mass spectrometry; Proteins; cross linking reag…
Musatov A., Robinson N.C.	Review	2012	Susceptibility of mitochondrial electron-transport complexes to oxidative damage. Focus on cytochrome c oxidase	Reactive oxygen species (ROS) are associated with a number of mitochondrial disorders. These include: ischemia/reperfusion injury, Parkinson's disease, Alzheimer's disease, neurodegenerative diseases, and other age-related degenerative changes. ROS can be generated at numerous sites within the cell, but the mitochondrial electron transport chain is recognized as the major source of intracellular …	0	0	English	biochemistry, ROS	Scopus	Free Radical Research	46	11		1313	1326		10.3109/10715762.2012.717273	https://www.scopus.com/inward/record.uri?eid=2-s2.0-84867534243&doi=10.3109%2f10715762.2012.717273&partnerID=40&md5=e19f79c833d670659d1e1d9b296bf1cb	Department of Biochemistry, University of Texas Health Science Center, 7703 Floyd Curl Drive, San Antonio, TX 78229-3900, United States; Institute of Experimental Physics Slovak Academic of Science, Watsonova, Košice, Slovakia	Musatov, A., Department of Biochemistry, University of Texas Health Science Center, 7703 Floyd Curl Drive, San Antonio, TX 78229-3900, United States, Institute of Experimental Physics Slovak Academic of Science, Watsonova, Košice, Slovakia; Robinson, N.C., Department of Biochemistry, University of Texas Health Science Center, 7703 Floyd Curl Drive, San Antonio, TX 78229-3900, United States	Cardiolipin; Complex I; Complex III; Complex IV; Oxygen species; Reactive	cardiolipin; cytochrome c; cytochrome c oxidase; membrane protein; peroxynitrite; reactive oxygen metabolite; superoxide; superoxide dismutase; aging; catalysis; chemical modification; chemical reaction; crystal structure; crystallography; degenerative disease; Drosophila melanogaster; electron transport; human; hydrolysis; lipid oxidation; liquid chromatography; mass spectrometry; mitochondrial …
Navarro A., Boveris A.	Review	2010	Brain mitochondrial dysfunction in aging, neurodegeneration, and Parkinson's disease	Brain senescence and neurodegeneration occur with a mitochondrial dysfunction characterized by impaired electron transfer and by oxidative damage. Brain mitochondria of old animals show decreased rates of electron transfer in complexes I and IV, decreased membrane potential, increased content of the oxidation products of phospholipids and proteins and increased size and fragility. This impairment…	1	1	English	biochemistry, PD, no DNA	Scopus	Frontiers in Aging Neuroscience	2	SEP	Article 34				10.3389/fnagi.2010.00034	https://www.scopus.com/inward/record.uri?eid=2-s2.0-79955646829&doi=10.3389%2ffnagi.2010.00034&partnerID=40&md5=254a758cf78105b73a874929a259a14a	Department of Biochemistry and Molecular Biology, Faculty of Medicine, University of Cádiz, Cádiz, Spain; Laboratory of Free Radical Biology, School of Pharmacy and Biochemistry, University of Buenos Aires, Buenos Aires, Argentina	Navarro, A., Department of Biochemistry and Molecular Biology, Faculty of Medicine, University of Cádiz, Cádiz, Spain; Boveris, A., Laboratory of Free Radical Biology, School of Pharmacy and Biochemistry, University of Buenos Aires, Buenos Aires, Argentina	Antioxidant therapy; Complex I syndrome; Mitochondria-targeted antioxidants; Vitamin E
Naydenov AV; Vassoler F; Luksik AS; Kaczmarska J; Konradi C	Journal Article	2010	Mitochondrial abnormalities in the putamen in Parkinson's disease dyskinesia.	Prolonged treatment of Parkinson's disease (PD) with levodopa leads to disabling side effects collectively referred to as 'dyskinesias'. We hypothesized that bioenergetic function in the putamen might play a crucial role in the development of dyskinesias. To test this hypothesis, we used post mortem samples of the human putamen and applied real time-PCR approaches and gene expression microarrays.…	1	1	English		EBSCOhost MEDLINE	Acta neuropathologica	120	5		623			10.1007/s00401-010-0740-8				Antiparkinson Agents adverse effects; Dyskinesia, Drug-Induced pathology; Mitochondria pathology; Parkinson Disease pathology; Putamen pathology; Animals; Chromatography, High Pressure Liquid; DNA, Mitochondrial drug effects; Dopamine adverse effects; Dopamine metabolism; Humans; Levodopa adverse effects; Levodopa metabolism; Male; Mitochondria drug effects; Neurons drug effects; Neurons patholog…
Nishino T.	Article	2012	Single Molecule Analysis Based on Molecular Tips of Scanning Tunneling Microscopy	We have developed molecular tips of scanning tunneling microscopy (STM) for singlemolecule analyses on solid surfaces. The molecular tips enable the selective observation of functional groups and metal ions on the basis of chemical interactions between the sample and tip molecules. A deliberate design for the chemical structure of a molecular tip leads to sophisticated molecular recognition at th…	1	1	Japanese	Article not English – Japanese (only Abstract English), STM, ET, DNA single molecule detection	Scopus	Bunseki Kagaku	61	10		833	844		10.2116/bunsekikagaku.61.833	https://www.scopus.com/inward/record.uri?eid=2-s2.0-84938676244&doi=10.2116%2fbunsekikagaku.61.833&partnerID=40&md5=e4c8ccf752d8732302056357d629d65f	Nanoscience and Nanotechnology Research Center, Research Organization for the 21st Century, Osaka Prefecture University, 1-2, Gakuen-cho, Naka-ku, Sakai-shi, Osaka 599-8570, Japan	Nishino, T., Nanoscience and Nanotechnology Research Center, Research Organization for the 21st Century, Osaka Prefecture University, 1-2, Gakuen-cho, Naka-ku, Sakai-shi, Osaka 599-8570, Japan	chemical recognition; molecular electronics; molecular tip; scanning tunneling microscopy
Núñez M.T., Urrutia P., Mena N., Aguirre P., Tapia V., Salazar J.	Article	2012	Iron toxicity in neurodegeneration	Iron is an essential element for life on earth, participating in a plethora of cellular processes where one-electron transfer reactions are required. Its essentiality, coupled to its scarcity in aqueous oxidative environments, has compelled living organisms to develop mechanisms that ensure an adequate iron supply, at times with disregard to long-term deleterious effects derived from iron accumul…	1	1	English	biochemistry, iron neurotoxicity	Scopus	BioMetals	25	4		761	776		10.1007/s10534-012-9523-0	https://www.scopus.com/inward/record.uri?eid=2-s2.0-84864917070&doi=10.1007%2fs10534-012-9523-0&partnerID=40&md5=59a3ea86aa97b89761c1d8ae69c64c88	Department of Biology, Faculty of Sciences, Universidad de Chile and Cell Dynamics and Biotechnology Institute, Santiago, Chile	Núñez, M.T., Department of Biology, Faculty of Sciences, Universidad de Chile and Cell Dynamics and Biotechnology Institute, Santiago, Chile; Urrutia, P., Department of Biology, Faculty of Sciences, Universidad de Chile and Cell Dynamics and Biotechnology Institute, Santiago, Chile; Mena, N., Department of Biology, Faculty of Sciences, Universidad de Chile and Cell Dynamics and Biotechnology Inst…	Fe-S clusters; GSH; Iron homeostasis; Mitochondria dysfunction; Neurodegeneration	1,2,3,6 tetrahydro 1 methyl 4 phenylpyridine; 6 transmembrane epithelial antigen of the prostate 3; chemokine receptor CXCR4; ferritin; glutathione; immunoglobulin enhancer binding protein; iron regulatory protein 1; lipopolysaccharide; membrane protein; n methyl dextro aspartic acid; natural resistance associated macrophage protein 2; neuromelanin; protein FPN1; protein ZIP14; protein ZIP14A; pr…
Orsucci D., Filosto M., Siciliano G., Mancuso M.	Review	2009	Electron transfer mediators and other metabolites and cofactors in the treatment of mitochondrial dysfunction	Mitochondrial disorders (MDs) are caused by impairment of the mitochondrial electron transport chain (ETC). The ETC is needed for oxidative phosphorylation, which provides the cell with the most efficient energy outcome in terms of ATP production. One of the pathogenic mechanisms of MDs is the accumulation of reactive oxygen species. Mitochondrial dysfunction and oxidative stress appear to also h…	0	1	English	mitochondrial ETC	Scopus	Nutrition Reviews	67	8		427	438		10.1111/j.1753-4887.2009.00221.x	https://www.scopus.com/inward/record.uri?eid=2-s2.0-77956509964&doi=10.1111%2fj.1753-4887.2009.00221.x&partnerID=40&md5=ea6847d9e8521860126923bbe10dcfca	Department of Neuroscience, Neurological Clinic, University of Pisa, Via Roma 67, 56126 Pisa, Italy; Neurological Institute of Brescia, Italy	Orsucci, D., Department of Neuroscience, Neurological Clinic, University of Pisa, Via Roma 67, 56126 Pisa, Italy; Filosto, M., Neurological Institute of Brescia, Italy; Siciliano, G., Department of Neuroscience, Neurological Clinic, University of Pisa, Via Roma 67, 56126 Pisa, Italy; Mancuso, M., Department of Neuroscience, Neurological Clinic, University of Pisa, Via Roma 67, 56126 Pisa, Italy	Carnitine; Coenzyme Q10; Creatine; Idebenone; Lipoic acid	adenosine triphosphate; alpha tocopherol; ascorbic acid; beta carotene; carnitine; creatine; dichloroacetic acid; dimethylglycine; hydroxymethylglutaryl coenzyme A reductase inhibitor; idebenone; levacecarnine; menadiol sodium phosphate; nicotinamide; placebo; reactive oxygen metabolite; retinol; riboflavin; succinic acid; thiamine; thioctic acid; ubidecarenone; warfarin; Alzheimer disease; amyot…
Pastoris, O Dossena, M Foppa, P Catapano, M Ferrari, R Dagani, F	Article	1995	Biochemical evaluations in skeletal muscles of primates with MPTP parkinson-like syndrome	The toxic effects of the neurotoxin MPTP (1-methyl-4-phenyl-1,2,3,6-tetrahydropyridine) in primates can be exploited for investigating the physiopathology of Parkinson's disease which may also cause functional alterations of skeletal muscles, whose biochemical modifications have been studied very little. Some enzyme activities related to energy transduction in skeletal muscles were evaluated (gas…	1	1	English	neuroscience, physiopathology, biochemistry	Sciencedirect	Pharmacological Research	31	6		361-369			https://doi.org/10.1016/1043-6618(95)80090-5	https://www.sciencedirect.com/science/article/pii/1043661895800905			MPTP Parkinson-like disease dihydroergocryptine enzyme activities skeletal muscles
Peng M., Wang Y., Fu Q., Sun F., Na N., Ouyang J.	Article	2018	Melanosome-Targeting Near-Infrared Fluorescent Probe with Large Stokes Shift for in Situ Quantification of Tyrosinase Activity and Assessing Drug Effects on Differently Invasive Melanoma Cells	Tyrosinase (TYR) plays a vital role in melanin biosynthesis and is widely regarded as a relatively specific marker for melanocytic lesions which involve vitiligo, malignant cutaneous melanoma, Parkinson's disease (PD), etc. However, the detection of TYR in living cells with fluorescent probes is usually interfered by diverse endogenous reactive oxygen species (ROS) and reactive nitrogen species (…	0	1	English	biomarker imaging, melanoma cancer	Scopus	Analytical Chemistry	90	10		6206	6213		10.1021/acs.analchem.8b00734	https://www.scopus.com/inward/record.uri?eid=2-s2.0-85046417701&doi=10.1021%2facs.analchem.8b00734&partnerID=40&md5=7b1ab01eaf9503b59a2dd924bca2f4a0	Key Laboratory of Theoretical and Computational Photochemistry, Ministry of Education, College of Chemistry, Beijing Normal University, Beijing, 100875, China	Peng, M., Key Laboratory of Theoretical and Computational Photochemistry, Ministry of Education, College of Chemistry, Beijing Normal University, Beijing, 100875, China; Wang, Y., Key Laboratory of Theoretical and Computational Photochemistry, Ministry of Education, College of Chemistry, Beijing Normal University, Beijing, 100875, China; Fu, Q., Key Laboratory of Theoretical and Computational Pho…		Biochemistry; Cells; Cytology; Dermatology; Fluorescence; Fluorescence spectroscopy; Image enhancement; Melanin; Oncology; Probes; Fluorescent signals; Low detection limit; Melanin biosynthesis; Near-infrared fluorescent; Parkinson's disease; Photo-induced electron transfer; Reactive nitrogen species; Reactive oxygen species; Infrared devices; fluorescent dye; kojic acid; monophenol monooxygenase…
Pettus E.H., Betarbet R., Cottrell B., Wallace D.C., Madyastha V., Greenamyre J.T.	Article	2000	Immunocytochemical characterization of the mitochondrially encoded ND1 subunit of complex I (NADH:Ubiquinone oxidoreductase) in rat brain	In Parkinson's disease, there is a selective defect in complex I of the electron transfer chain. To better understand complex I and its involvement in neurodegenerative disease, we raised an antibody against a conserved epitope of the human mitochondrially encoded subunit 1 of complex I (ND1). Antibodies were affinity purified and assessed by ELISA, immunoblotting, and immunocytochemistry. Immuno…	2	1	English	immunohistochemistry, PD, neuroscience, antobody as tool to access normal and pathological conditions	Scopus	Journal of Neurochemistry	75	1		383	392		10.1046/j.1471-4159.2000.0750383.x	https://www.scopus.com/inward/record.uri?eid=2-s2.0-0034126793&doi=10.1046%2fj.1471-4159.2000.0750383.x&partnerID=40&md5=30381a85835e6dfd2febd81fd78bab00	Department of Neurology, Emory University, Atlanta, GA, United States; Department of Pharmacology, Emory University, Atlanta, GA, United States; Center for Molecular Medicine, Emory University, Atlanta, GA, United States; Yerkes Regl. Primate Research Center, Emory University, Atlanta, GA, United States; Department of Neurology, Emory University, WMRB 6000, 1639 Pierce Dr., Atlanta, GA 30322, Uni…	Pettus, E.H., Department of Neurology, Emory University, Atlanta, GA, United States; Betarbet, R., Department of Neurology, Emory University, Atlanta, GA, United States; Cottrell, B., Center for Molecular Medicine, Emory University, Atlanta, GA, United States; Wallace, D.C., Center for Molecular Medicine, Emory University, Atlanta, GA, United States; Madyastha, V., Department of Neurology, Emory …	Complex I; Complex IV; Immunocytochemistry; Mitochondria; Mitochondrially encoded subunit I of NADH dehydrogenase (complex I)	cytochrome c oxidase; epitope; protein subunit; reduced nicotinamide adenine dinucleotide dehydrogenase (ubiquinone); animal tissue; article; brain mitochondrion; controlled study; electron transport; immunocytochemistry; immunoreactivity; molecular weight; nerve degeneration; nonhuman; priority journal; protein domain; protein purification; rat; substantia nigra; Animals; Antibody Specificity; B…
Poteet E., Winters A., Yan L.-J., Shufelt K., Green K.N., Simpkins J.W., Wen Y., Yang S.-H.	Article	2012	Neuroprotective Actions of Methylene Blue and Its Derivatives	Methylene blue (MB), the first lead chemical structure of phenothiazine and other derivatives, is commonly used in diagnostic procedures and as a treatment for methemoglobinemia. We have previously demonstrated that MB could function as an alternative mitochondrial electron transfer carrier, enhance cellular oxygen consumption, and provide protection in vitro and in rodent models of Parkinson's d…	2	1	English	MB, biochemistry, mitochondrial electron transfer	Scopus	PLoS ONE	7	10	e48279				10.1371/journal.pone.0048279	https://www.scopus.com/inward/record.uri?eid=2-s2.0-84868282410&doi=10.1371%2fjournal.pone.0048279&partnerID=40&md5=4a3b831ab5b1d47e30995725a2f20c38	Department of Pharmacology and Neuroscience, Institute for Alzheimer's Disease and Aging Research, University of North Texas Health Science Center at Fort Worth, Fort Worth, TX, United States; Department of Chemistry, Texas Christian University, Fort Worth, TX, United States	Poteet, E., Department of Pharmacology and Neuroscience, Institute for Alzheimer's Disease and Aging Research, University of North Texas Health Science Center at Fort Worth, Fort Worth, TX, United States; Winters, A., Department of Pharmacology and Neuroscience, Institute for Alzheimer's Disease and Aging Research, University of North Texas Health Science Center at Fort Worth, Fort Worth, TX, Uni…		2 chlorophenothiazine; chlorpromazine; cytochrome c oxidase; free radical; glucose oxidase; glutamic acid; indoleacetic acid; methylene blue; neutral red; phenothiazine; phenothiazine derivative; promethazine; reactive oxygen metabolite; reduced nicotinamide adenine dinucleotide; reduced nicotinamide adenine dinucleotide dehydrogenase (ubiquinone); rotenone; succinate dehydrogenase (ubiquinone); …
Rahman S.F., Gobikhrisnan S., Gozan M., Jong G.T., Park D.-H.	Article	2016	L-DOPA synthesis using tyrosinase-immobilized on electrode surfaces	Levodopa or L-3,4-dihydroxyphenylalanine (L-DOPA) is the direct precursor of the neurotransmitter dopamine. L-DOPA is a well-known neuroprotective agent for the treatment of Parkinson's disease symptoms. L-DOPA was synthesized using the enzyme, tyrosinase, as a biocatalyst for the conversion of L-tyrosine to L-DOPA and an electrochemical method for reducing L-DOPAquinone, the product resulting fr…	0	1	English	PD but drug treatment	Scopus	Korean Chemical Engineering Research	54	6		817	821		10.9713/kcer.2016.54.6.817	https://www.scopus.com/inward/record.uri?eid=2-s2.0-85002801338&doi=10.9713%2fkcer.2016.54.6.817&partnerID=40&md5=555ddfbd291779593260a94ce08ab93c	Interdisciplinary Program of Graduate School for Bioenergy and Biomaterials, Chonnam National University, 77, Yongbong-ro, Buk-gu, Gwangju, 61186, South Korea; Department of Bioscience and Technology, Karunya University, Coimbatore, 641114, India; Bioprocess Engineering Research Group, Chemical Engineering Department, Faculty of Engineering, Universitas Indonesia, Kampus UI Depok16424, Indonesia;…	Rahman, S.F., Interdisciplinary Program of Graduate School for Bioenergy and Biomaterials, Chonnam National University, 77, Yongbong-ro, Buk-gu, Gwangju, 61186, South Korea; Gobikhrisnan, S., Department of Bioscience and Technology, Karunya University, Coimbatore, 641114, India; Gozan, M., Bioprocess Engineering Research Group, Chemical Engineering Department, Faculty of Engineering, Universitas …	Electrode surface; L-dopa synthesis; Parkinson's disease; Tyrosinase-immobilized
Rahman S.F., Gobikrishnan S., Indrawan N., Park S.-H., Park J.-H., Min K., Yoo Y.J., Park D.-H.	Article	2012	A study on the electrochemical synthesis of L-DOPA using oxidoreductase enzymes: Optimization of an electrochemical process	Levodopa or L-3,4-dihydroxyphenylalanine (L-DOPA) is the precursor of the neurotransmitter dopamine. L-DOPA is a famous treatment for Parkinson's disease symptoms. In this study, electroenzymatic synthesis of L-DOPA was performed in a three-electrode cell, comprising a Ag/AgCl reference electrode, a platinum wire auxiliary electrode, and a glassy carbon working electrode. L-DOPA had an oxidation …	0	1	English	PD drug, no DNA	Scopus	Journal of Microbiology and Biotechnology	22	10		1446	1451		10.4014/jmb.1206.06043	https://www.scopus.com/inward/record.uri?eid=2-s2.0-84930482656&doi=10.4014%2fjmb.1206.06043&partnerID=40&md5=5ed4003c95208f6613ea3bebdafed6e4	Interdisciplinary Program of Bioenergy and Biomaterial Engineering, Chonnam National University, Gwangju 500-757, South Korea; Clean Energy Research Center, Korea Institute of Science and Technology, Seoul 136-791, South Korea; School of Chemical and Biological Engineering, Seoul National University, Seoul 151-741, South Korea; Department of Biotechnology and Bioengineering, School of Biological …	Rahman, S.F., Interdisciplinary Program of Bioenergy and Biomaterial Engineering, Chonnam National University, Gwangju 500-757, South Korea; Gobikrishnan, S., Interdisciplinary Program of Bioenergy and Biomaterial Engineering, Chonnam National University, Gwangju 500-757, South Korea; Indrawan, N., Interdisciplinary Program of Bioenergy and Biomaterial Engineering, Chonnam National University, Gw…	Electrochemical synthesis; L-DOPA; Parkinson's disease; Tyrosinase
Raj M.A., Gowthaman N.S.K., John S.A.	Article	2016	Highly sensitive interference-free electrochemical determination of pyridoxine at graphene modified electrode: Importance in Parkinson and Asthma treatments	To reduce the side effects in the medication of Parkinson and Asthma, pyridoxine (PY) is administered along with L-3,4-dihydroxyphenyl alanine (L-dopa) and theophylline (TP), respectively. However, excessive dosage of PY leads to nervous disorder. Thus, a sensitive and selective electrochemical method was developed for the determination of PY in the presence of major interferences including TP, l…	0	0	English	pharmacology of PD drug	Scopus	Journal of Colloid and Interface Science	474			171	178		10.1016/j.jcis.2016.04.025	https://www.scopus.com/inward/record.uri?eid=2-s2.0-84964327194&doi=10.1016%2fj.jcis.2016.04.025&partnerID=40&md5=22a7f3454a8eed7fb557ed2ff6c0307e	Department of Chemistry, Loyola College, Chennai, Tamil Nadu, 600 034, India; Centre for Nanoscience and Nanotechnology, Department of Chemistry, Gandhigram Rural Institute, Gandhigram, Dindigul, Tamil Nadu, 624 302, India	Raj, M.A., Department of Chemistry, Loyola College, Chennai, Tamil Nadu, 600 034, India; Gowthaman, N.S.K., Centre for Nanoscience and Nanotechnology, Department of Chemistry, Gandhigram Rural Institute, Gandhigram, Dindigul, Tamil Nadu, 624 302, India; John, S.A., Centre for Nanoscience and Nanotechnology, Department of Chemistry, Gandhigram Rural Institute, Gandhigram, Dindigul, Tamil Nadu, 624…	Electrochemical reduction; L-3,4-dihydroxyphenyl alanine; Pyridoxine; Tablet analysis; Theophylline; Vitamins	Amino acids; Ascorbic acid; Carbon; Chemical detection; Diseases; Drug interactions; Drug products; Electrodes; Electrolytic reduction; Glass membrane electrodes; Graphene; Interference suppression; Organic acids; Reduction; Vitamins; Electrochemical reductions; L-3,4-dihydroxyphenyl alanine; Pyridoxine; Tablet analysis; Theophylline; Electrochemical electrodes; 1,6 hexadiamine; amine; ascorbic a…
Reale M; Pesce M; Priyadarshini M; Kamal MA; Patruno A	Journal Article	2012	Mitochondria as an easy target to oxidative stress events in Parkinson's disease.	Parkinson's disease (PD) is related to excess production of reactive oxygen species (ROS) or inadequate and impaired detoxification by endogenous antioxidants, alterations in catecholamine metabolism, alterations in mitochondrial electron transfer function, and enhanced iron deposition in the substantia nigra. The concept that oxidative stress is an important mechanism underlying the degeneration…	1	0	English		EBSCOhost MEDLINE	CNS & neurological disorders drug targets	11	4		430			10.2174/187152712800792875				Dopaminergic Neurons metabolism; Mitochondria metabolism; Oxidative Stress physiology; Parkinson Disease metabolism; Animals; Brain enzymology; Humans; Parkinson Disease etiology; Tyrosine 3-Monooxygenase metabolism
Rospigliosi A., Ehlich R., Hoerber H., Middelberg A., Moggridge G.	Article	2007	Electron transfer of plurimodified DNA SAMs	An STM-based current-voltage (I/V) investigation of deoxyribonucleic acid (DNA) 18 base pair (bp) oligonucleotide monolayers on gold is presented. Three bases of each of the immobilized and complementary strands were modified with either iodine or phenylethylene moieties. The oligonucleotides were immobilized on template stripped gold (tsg) surfaces and characterized by atomic force microscopy (A…	1	1	English	STM, DNA 18 base pairs, ET	Scopus	Langmuir	23	15		8264	8271		10.1021/la063704g	https://www.scopus.com/inward/record.uri?eid=2-s2.0-34547293493&doi=10.1021%2fla063704g&partnerID=40&md5=50ac945cca9b3a6d16274540cf90ee13	Department of Chemical Engineering, University of Cambridge, New Museum Site, Pembroke Street, Cambridge CB2 3RA, United Kingdom; H. H. Wills Physics Laboratory, University of Bristol, Tyndall Avenue, Bristol BS8 ITL, United Kingdom; Australian Institute for Bioengineering and Nanotechnology (AIBN), Queensland Bioscience Precinct (Bldg 80), University of Queensland, Brisbane, QLD 4072, Australia	Rospigliosi, A., Department of Chemical Engineering, University of Cambridge, New Museum Site, Pembroke Street, Cambridge CB2 3RA, United Kingdom; Ehlich, R., H. H. Wills Physics Laboratory, University of Bristol, Tyndall Avenue, Bristol BS8 ITL, United Kingdom; Hoerber, H., H. H. Wills Physics Laboratory, University of Bristol, Tyndall Avenue, Bristol BS8 ITL, United Kingdom; Middelberg, A., Aus…		Atomic force microscopy; Current voltage characteristics; Electron transitions; Monolayers; Oligonucleotides; Scanning tunneling microscopy; Ultraviolet spectroscopy; Base pair; Complementary strands; Phenylethylene moieties; SAM; DNA; DNA; gold; iodine; oligodeoxyribonucleotide; article; atomic force microscopy; chemistry; electric conductivity; electrochemistry; electron; scanning transmission …
Rouhani M., Soleymanpour A.	Article	2020	Preparation of Dawson heteropolyacid-embedded silver nanoparticles/graphene oxide nanocomposite thin film used to modify pencil graphite electrode as a sensor for trace electrochemical sensing of levodopa	Measurement of levodopa (LD) as the most efficient treatment accessible for controlling the symptoms of Parkinson's disease was investigated. The electrocatalytic measurement of LD was performed at the surface of pencil graphite electrode (PGE) modified with graphene oxide (GO) and silver nanoparticle@Dawson heteropolyacid (AgNPs@DHPA). For this purpose, GO and the intermediate (AgNPs@DHPA) were …	0	1	English	Biochemistry, PD drug treatment, sensor	Scopus	Materials Science and Engineering C	117		111287				10.1016/j.msec.2020.111287	https://www.scopus.com/inward/record.uri?eid=2-s2.0-85089136553&doi=10.1016%2fj.msec.2020.111287&partnerID=40&md5=55bbc7135075fb42d77ee8619ce5fc69	School of Chemistry, Damghan University, Damghan, 3671641167, Iran	Rouhani, M., School of Chemistry, Damghan University, Damghan, 3671641167, Iran; Soleymanpour, A., School of Chemistry, Damghan University, Damghan, 3671641167, Iran	Dawson heteropolyacid; Graphene oxide; Levodopa; Nanocomposite thin film; Pencil graphite electrode	Charge transfer; Cost effectiveness; Electrochemical sensors; Film preparation; Graphene; Graphite; Graphite electrodes; Metal nanoparticles; Morphology; Nanocomposite films; Rate constants; Silver nanoparticles; Thin films; Concentration ranges; Electrochemical behaviors; Electrochemical sensing; Nanocomposite thin films; Pencil graphite electrode; Phosphate buffer solutions; Straight-forward me…
Salvatore P., Karlsen K.K., Hansen A.G., Zhang J., Nichols R.J., Ulstrup J.	Article	2012	Polycation induced potential dependent structural transitions of oligonucleotide monolayers on Au(111)-surfaces	We have studied self-assembled molecular monolayers (SAMs) of several 3′-C3-SH conjugated single-strand (ss) and double-strand (ds) 20-base oligonucleotides (ONs) immobilized on single-crystal, atomically planar Au(111)-electrode surfaces in the presence of the triply positively charged base spermidine (Spd). This cation binds strongly to the polyanionic ON backbone and stabilizes the ds-form rel…	1	1	English	DNA ss and ds 20 base pairs, STM electrochemical control	Scopus	Journal of the American Chemical Society	134	46		19092	19098		10.1021/ja306877s	https://www.scopus.com/inward/record.uri?eid=2-s2.0-84869392131&doi=10.1021%2fja306877s&partnerID=40&md5=9b5ab6daf3d3baf0ab971d19ffa19495	Department of Chemistry, Building 207, Technical University of Denmark, DK-2800 Kongens Lyngby, Denmark; Department of Physics, Chemistry and Pharmacy, University of Southern Denmark, Campusvej 55, DK-5230, Odense M, Denmark; Department of Chemistry, University of Liverpool, Liverpool L69 7ZD, United Kingdom	Salvatore, P., Department of Chemistry, Building 207, Technical University of Denmark, DK-2800 Kongens Lyngby, Denmark; Karlsen, K.K., Department of Physics, Chemistry and Pharmacy, University of Southern Denmark, Campusvej 55, DK-5230, Odense M, Denmark; Hansen, A.G., Department of Chemistry, Building 207, Technical University of Denmark, DK-2800 Kongens Lyngby, Denmark; Zhang, J., Department of…		Au(1 1 1 ); Base pairs; Electrochemical potential; Electrode surfaces; In-situ scanning tunneling microscopies; Long-range electron transfer; Molecular monolayer; Peak potentials; Polyanionics; Polycations; Positively charged; Potential-dependent; Redox molecules; Sams; Saturated calomel electrode; Self-assembled; Spermidine; Structural reorganization; Structural transitions; Cyclic voltammetry; …
Srinivas Bharath M.M.	Review	2017	Post-Translational Oxidative Modifications of Mitochondrial Complex i (NADH: Ubiquinone Oxidoreductase): Implications for Pathogenesis and Therapeutics in Human Diseases	Mitochondrial complex I (NADH: ubiquinone oxidoreductase; CI) is central to the electron transport chain (ETC), oxidative phosphorylation, and ATP production in eukaryotes. CI is a multi-subunit complex with a complicated yet organized structure that optimally connects electron transfer with proton translocation and forms higher-order supercomplexes with other ETC complexes. Efforts to understand…	0	0	English	biochemistry	Scopus	Journal of Alzheimer's Disease	60	s1		S69	S86		10.3233/JAD-170117	https://www.scopus.com/inward/record.uri?eid=2-s2.0-85029478276&doi=10.3233%2fJAD-170117&partnerID=40&md5=9de7cc9bb767740913433860f83b8651	Department of Neurochemistry, National Institute of Mental Health and Neurosciences (NIMHANS), No. 2900, Hosur Road, Bangalore, 560029, India	Srinivas Bharath, M.M., Department of Neurochemistry, National Institute of Mental Health and Neurosciences (NIMHANS), No. 2900, Hosur Road, Bangalore, 560029, India	Carbonylation; cysteine; nitration; nitrosation; oxidative stress; protein oxidation; thiols	cysteine; disulfide; reduced nicotinamide adenine dinucleotide dehydrogenase (ubiquinone); thiol; reactive oxygen metabolite; reduced nicotinamide adenine dinucleotide dehydrogenase (ubiquinone); aging; carbonylation; cells by body anatomy; central nervous system disease; cytoarchitecture; gene mutation; human; mitochondrion; nerve degeneration; neurologic disease; nitration; nitrosylation; nonhu…
Stankiewicz J.M., Brass S.D.	Review	2009	Role of iron in neurotoxicity: A cause for concern in the elderly?	Purpose of review: To explore the role of iron physiology in the brain of healthy adults and review how increased brain iron deposition has been associated with common neurodegenerative diseases that affect the elderly. Recent findings: Because iron plays a role in oxygen transportation, myelin synthesis, neurotransmitter production, and electron transfers, it serves as a crucial cofactor in norm…	1	1	English	iron pathophysiology, neurotoxicity, neuroimaging	Scopus	Current Opinion in Clinical Nutrition and Metabolic Care	12	1		22	29		10.1097/MCO.0b013e32831ba07c	https://www.scopus.com/inward/record.uri?eid=2-s2.0-58149123408&doi=10.1097%2fMCO.0b013e32831ba07c&partnerID=40&md5=766c5cd53f0e3af8139761a487b62d39	Partners MS Center, Department of Neurology, Brigham and Women's Hospital, Boston, MA, United States; Department of Neurology, Massachusetts General Hospital, Harvard Medical School, Boston, MA, United States; Partners MS Center, 1 Brookline Place West, Brookline, MA 02445, United States	Stankiewicz, J.M., Partners MS Center, Department of Neurology, Brigham and Women's Hospital, Boston, MA, United States, Partners MS Center, 1 Brookline Place West, Brookline, MA 02445, United States; Brass, S.D., Partners MS Center, Department of Neurology, Brigham and Women's Hospital, Boston, MA, United States, Department of Neurology, Massachusetts General Hospital, Harvard Medical School, Bo…	Alzheimer's disease; Iron; Parkinson's disease; Stroke	alpha tocopherol; antioxidant; ascorbic acid; chelating agent; clioquinol; deferoxamine; euk 189; ferritin; ferroportin 1; green tea extract; hephaestin; iron; nitric oxide; penicillamine; placebo; selegiline; ubidecarenone; unclassified drug; aging; Alzheimer disease; antioxidant activity; clinical trial; elderly care; human; iron binding capacity; iron chelation; iron metabolism; iron overload;…
Stankiewicz, James Panter, S Scott Neema, Mohit Arora, Ashish Batt, Courtney E Bakshi, Rohit	Article	2007	Iron in Chronic Brain Disorders: Imaging and Neurotherapeutic Implications	Summary Iron is important for brain oxygen transport, electron transfer, neurotransmitter synthesis, and myelin production. Though iron deposition has been observed in the brain with normal aging, increased iron has also been shown in many chronic neurological disorders including Alzheimer’s disease, Parkinson’s disease, and multiple sclerosis. In vitro studies have demonstrated that excessive ir…	1	1	English	neuroimaging, iron, disease	Sciencedirect	Neurotherapeutics	4	3		371-386			https://doi.org/10.1016/j.nurt.2007.05.006	https://www.sciencedirect.com/science/article/pii/S1933721307000906			Alzheimer’s disease Iron MRI Parkinson’s disease chelation multiple sclerosis neurodegeneration
Stauch K.L., Villeneuve L.M., Purnell P.R., Ottemann B.M., Emanuel K., Fox H.S.	Article	2016	Loss of Pink1 modulates synaptic mitochondrial bioenergetics in the rat striatum prior to motor symptoms: concomitant complex I respiratory defects and increased complex II-mediated respiration	Purpose: Mutations in PTEN-induced putative kinase 1 (Pink1), a mitochondrial serine/threonine kinase, cause a recessive inherited form of Parkinson's disease (PD). Pink1 deletion in rats results in a progressive PD-like phenotype, characterized by significant motor deficits starting at 4 months of age. Despite the evidence of mitochondrial dysfunction, the pathogenic mechanism underlying disease…	1	1	English	DNA, PD, proteomics MS, pathological mechanism remains obscure	Scopus	Proteomics - Clinical Applications	10	12		1205	1217		10.1002/prca.201600005	https://www.scopus.com/inward/record.uri?eid=2-s2.0-84988350538&doi=10.1002%2fprca.201600005&partnerID=40&md5=fe2e57dd64f096c836c4106d978652c3	Department of Pharmacology and Experimental Neuroscience, University of Nebraska Medical Center, Omaha, NE, United States	Stauch, K.L., Department of Pharmacology and Experimental Neuroscience, University of Nebraska Medical Center, Omaha, NE, United States; Villeneuve, L.M., Department of Pharmacology and Experimental Neuroscience, University of Nebraska Medical Center, Omaha, NE, United States; Purnell, P.R., Department of Pharmacology and Experimental Neuroscience, University of Nebraska Medical Center, Omaha, NE…	bioenergetics; mitochondria; Pink1; synapses	amino acid; choline; fatty acid; phosphatidylinositol 3,4,5 trisphosphate 3 phosphatase; protein serine threonine kinase; PTEN induced putative kinase 1; ubiquinone; unclassified drug; protein kinase; PTEN-induced putative kinase; reduced nicotinamide adenine dinucleotide dehydrogenase (ubiquinone); succinate dehydrogenase (ubiquinone); animal cell; animal experiment; animal tissue; Article; comp…
Sun, Kai Xia, Ning Zhao, Lijuan Liu, Ke Hou, Wenjing Liu, Lin	Journal Article	2017	Aptasensors for the selective detection of alpha-synuclein oligomer by colorimetry, surface plasmon resonance and electrochemical impedance spectroscopy	Soluble alpha-synuclein (α-syn) oligomer is believed to be a reliable molecular biomarker for diagnosis of Parkinson's disease (PD). Thus, it is critical to develop a simple method for the selective detection of α-syn oligomer with low cost as well as high sensitivity. In this paper, we reported the label-free detection of α-syn oligomer using a DNA aptamer as the bioreceptor with the techniques …	1	0	English	biomarker/biosensor DNA, alpha-synuclein	Sciencedirect	Sensors and Actuators B: Chemical	245			87-94			https://doi.org/10.1016/j.snb.2017.01.171	https://www.sciencedirect.com/science/article/pii/S0925400517301788			Alpha-synuclein oligomer Aptasensors Colorimetry Electrochemical impedance spectroscopy Parkinson's disease Surface plasmon resonance
Takeshige K.	Conference Paper	1994	Superoxide formation and lipid peroxidation by the mitochondrial electrontransfer chain	Isolated mitochondria supplemented with succinate or NAD+-linked substrates generate hydrogen peroxide (H2O2) in State 4 and the generation is enhanced by antimycin A, an inhibitor of the respiratory chain. Superoxide is a stoichiometric precursor of mitochondrial H2O2 because the ratio of O2- /H2O2 generation rates is close to 2.0 and is generated by an autoxidizable component in the NADH dehydr…	0	0	Japanese	biochemistry,no DNA	Scopus	Clinical Neurology	34	12		1269	1271			https://www.scopus.com/inward/record.uri?eid=2-s2.0-0028672290&partnerID=40&md5=038f1776fa4555e9a6139c4aacc428f5	Department of Biochemistry, Kyushu University School of Medicine, Fukuoka-shi 812, Japan	Takeshige, K., Department of Biochemistry, Kyushu University School of Medicine, Fukuoka-shi 812, Japan	lipid peroxidation; mitochondria; MPP+; parkinsonism; superoxide	1 methyl 4 phenylpyridinium; antimycin a1; animal experiment; animal model; animal tissue; conference paper; controlled study; cow; lipid peroxidation; mitochondrion; nonhuman; parkinsonism; Electron Transport; English Abstract; Human; Lipid Peroxidation; Mitochondria; Parkinson Disease; Superoxides
Tao N.J., DeRose J.A., Lindsay S.M.	Article	1993	Self-assembly of molecular superstructures studied by in situ scanning tunneling microscopy: DNA bases on Au(111)	We have studied the DNA bases adenine, thymine, guanine, and cytosine adsorbed onto Au(111) using in situ scanning tunneling microscopy (STM), atomic force microscopy (AFM), and cyclic voltammetry. Adenine, guanine, and cytosine adsorbed spontaneously onto the electrode with the counter electrode disconnected and yielded stable images over a range of electrode potentials. Thymine was not adsorbed…	2	1	English	EC, DNA, STM, although no PD	Scopus	Journal of Physical Chemistry	97	4		910	919		10.1021/j100106a017	https://www.scopus.com/inward/record.uri?eid=2-s2.0-0042547743&doi=10.1021%2fj100106a017&partnerID=40&md5=904b3188b89e4100d7004b4deafa5d14	Department of Physics, Arizona State University, Tempe, AZ 85287-1504, United States	Tao, N.J., Department of Physics, Arizona State University, Tempe, AZ 85287-1504, United States; DeRose, J.A., Department of Physics, Arizona State University, Tempe, AZ 85287-1504, United States; Lindsay, S.M., Department of Physics, Arizona State University, Tempe, AZ 85287-1504, United States
Tucker D., Lu Y., Zhang Q.	Review	2018	From Mitochondrial Function to Neuroprotection—an Emerging Role for Methylene Blue	Methylene blue (MB) is a well-established drug with a long history of use, owing to its diverse range of use and its minimal side effect profile. MB has been used classically for the treatment of malaria, methemoglobinemia, and carbon monoxide poisoning, as well as a histological dye. Its role in the mitochondria, however, has elicited much of its renewed interest in recent years. MB can reroute …	0	0	English	Methylene blue (MB) neuroprotective therapeutic, no DNA	Scopus	Molecular Neurobiology	55	6		5137	5153		10.1007/s12035-017-0712-2	https://www.scopus.com/inward/record.uri?eid=2-s2.0-85028309602&doi=10.1007%2fs12035-017-0712-2&partnerID=40&md5=b07ec72301b253de020fb732366c28e6	Department of Neuroscience and Regenerative Medicine, Augusta University, 1120 15th Street, Augusta, GA 30912, United States	Tucker, D., Department of Neuroscience and Regenerative Medicine, Augusta University, 1120 15th Street, Augusta, GA 30912, United States; Lu, Y., Department of Neuroscience and Regenerative Medicine, Augusta University, 1120 15th Street, Augusta, GA 30912, United States; Zhang, Q., Department of Neuroscience and Regenerative Medicine, Augusta University, 1120 15th Street, Augusta, GA 30912, Unite…	Cognitive enhancement; Methylene blue; Neurodegenerative disorders; Neurogenesis; Neuroprotection	cytochrome c; dipeptidyl carboxypeptidase inhibitor; guanylate cyclase; methylene blue; monoamine oxidase inhibitor; nitric oxide synthase; reduced nicotinamide adenine dinucleotide; tau protein; transcription factor Nrf2; methylene blue; Alzheimer disease; anemia; animal experiment; animal model; brain ischemia; carbon monoxide intoxication; cerebrovascular accident; cognition; cognitive defect;…
Tuite E., Lincoln P., Olofsson J., Becker H.-C., Önfelt B., Erts D., Nordén B.	Article	2000	Probing DNA conductivity with photoinduced electron transfer and scanning tunneling microscopy	The possibility that the stacked DNA bases can mediate vectorial electron transfer has been examined using two different approaches. Experiments on photoinduced electron transfer with intercalated donors and acceptors (either randomly bound or linked dyads of ruthenium complex and viologen) indicate that while DNA may be a better medium than acetonitrile for electron transfer over short distances…	1	1	English	DNA, ET, STM	Scopus	Journal of Biomolecular Structure and Dynamics	17	SUPPL. 1		277	283		10.1080/07391102.2000.10506632	https://www.scopus.com/inward/record.uri?eid=2-s2.0-84871941040&doi=10.1080%2f07391102.2000.10506632&partnerID=40&md5=e59388766a8c7a17d3312e075621e69d	Department of Physical Chemistry, Chalmers University of Technology, S-412 96 Göteborg, Sweden; Institute of Chemical Physics, University of Latvia, LV-1586 Riga, Latvia	Tuite, E., Department of Physical Chemistry, Chalmers University of Technology, S-412 96 Göteborg, Sweden; Lincoln, P., Department of Physical Chemistry, Chalmers University of Technology, S-412 96 Göteborg, Sweden; Olofsson, J., Department of Physical Chemistry, Chalmers University of Technology, S-412 96 Göteborg, Sweden; Becker, H.-C., Department of Physical Chemistry, Chalmers University of T…		DNA; intercalating agent; electron; electron transport; oxidation reduction reaction; scanning tunneling microscopy; DNA; Electron Transport; Electrons; Intercalating Agents; Microscopy, Scanning Tunneling; Oxidation-Reduction
Umeno A; Biju V; Yoshida Y	Review	2017	In vivo ROS production and use of oxidative stress-derived biomarkers to detect the onset of diseases such as Alzheimer's disease, Parkinson's disease, and diabetes.	Breakthroughs in biochemistry have furthered our understanding of the onset and progression of various diseases, and have advanced the development of new therapeutics. Oxidative stress and reactive oxygen species (ROS) are ubiquitous in biological systems. ROS can be formed non-enzymatically by chemical, photochemical and electron transfer reactions, or as the byproducts of endogenous enzymatic r…	1	1	English		EBSCOhost MEDLINE	Free radical research	51	4		413			10.1080/10715762.2017.1315114				Alzheimer Disease metabolism; Biomarkers metabolism; Diabetes Mellitus metabolism; Oxidative Stress; Parkinson Disease metabolism; Reactive Oxygen Species metabolism; Alzheimer Disease diagnosis; Animals; Antioxidants metabolism; Diabetes Mellitus diagnosis; Humans; Parkinson Disease diagnosis
Urie K.G., Angulo D., Lee J.C., Kozak J.J., Gray H.B., Winkler J.R.	Article	2009	Synchronous vs Asynchronous chain motion in α-Synuclein contact dynamics	α-Synuclein (α-syn) is an intrinsically unstructured 140-residue neuronal protein of uncertain function that is implicated in the etiology of Parkinson's disease. Tertiary contact formation rate constants in α-syn, determined from diffusion-limited electron-transfer kinetics measurements, are poorly approximated by simple random polymer theory. One source of the discrepancy between theory and exp…	2	1	English	a-synuclein, PD, simulation study	Scopus	Journal of Physical Chemistry B	113	2		522	530		10.1021/jp806727e	https://www.scopus.com/inward/record.uri?eid=2-s2.0-61949324580&doi=10.1021%2fjp806727e&partnerID=40&md5=058be04c9f6b563f7e9fc3cae2e4a2ec	Department of Chemistry, DePaul University, 243 South Wabash Ave, Chicago, IL 60604-2301, United States; Laboratory of Molecular Biophysics, National Heart, Lung, and Blood Institute, National Institutes of Health, Bethesda, MD 20892-8013, United States; Beckman Institute, California Institute of Technology, Pasadena, CA 91125-7400, United States	Urie, K.G., Department of Chemistry, DePaul University, 243 South Wabash Ave, Chicago, IL 60604-2301, United States; Angulo, D., Department of Chemistry, DePaul University, 243 South Wabash Ave, Chicago, IL 60604-2301, United States; Lee, J.C., Laboratory of Molecular Biophysics, National Heart, Lung, and Blood Institute, National Institutes of Health, Bethesda, MD 20892-8013, United States; Koza…		Dynamics; Monte Carlo methods; Chain motions; Contact dynamics; Contact formations; Diffusion limiteds; Drag effects; Electron-transfer kinetics; Hydrophobic residues; Loop formations; Monte carlo simulations; Neuronal proteins; Parkinson's disease; Polymer theories; Random coils; Synchronous motions; Synuclein; Uncertain functions; Rate constants
Van Zalinge H., Schiffrin D.J., Bates A.D., Haiss W., Ulstrup J., Nichols R.J.	Article	2006	Single-molecule conductance measurements of single- and double-stranded DNA oligonucleotides	Charge transfer through DNA: The single-molecule conductance of homopolymeric oligodeoxynucleotides has been recorded using scanning tunneling microscopy. The conductance σ of these oligodeoxynucleotides is very low when compared to double-stranded molecules. This clearly illustrates the importance of base stacking for conductance in double strands. The conductance values for single-stranded olig…	1	1	English	STM, DNA, charge transfer	Scopus	ChemPhysChem	7	1		94	98		10.1002/cphc.200500413	https://www.scopus.com/inward/record.uri?eid=2-s2.0-31144463995&doi=10.1002%2fcphc.200500413&partnerID=40&md5=54b74fedc3b049d310db9da01b8aba1b	Centre for Nanoscale Science, Chemistry Department, University of Liverpool, Liverpool L69 7ZD, United Kingdom; School of Biological Sciences, University of Liverpool, Liverpool L69 7ZB, United Kingdom; Department of Chemistry, Technical University of Denmark, 2800 Lyngby, Denmark	Van Zalinge, H., Centre for Nanoscale Science, Chemistry Department, University of Liverpool, Liverpool L69 7ZD, United Kingdom; Schiffrin, D.J., Centre for Nanoscale Science, Chemistry Department, University of Liverpool, Liverpool L69 7ZD, United Kingdom; Bates, A.D., School of Biological Sciences, University of Liverpool, Liverpool L69 7ZB, United Kingdom; Haiss, W., Centre for Nanoscale Scien…	DNA; Electron transfer; Oligonucleotides; Scanning probe microscopy; Single-molecule studies	Charge transfer; Oligonucleotides; Scanning probe microscopy; Scanning tunneling microscopy; Base stacking; Conductance values; Double stranded DNA; Double strands; Electron transfer; Oligodeoxynucleotides; Single molecule conductance; Single-molecule studies; DNA
Varshney G., Sharma D.K.	Article	2012	Voltammetric study of (E)-2-cyano-3-(3,4-dihydroxy-5-nitrophenol)-N,Ndiethyl- 2-propenamide in protic acidic media	The voltammetric properties of entacapone, an anti-Parkinson's disease drug, are investigated by cyclic voltammetry on two different working electrodes. In cyclic voltammetry, entacapone shows one well defined irreversible reduction peak at both the electrodes i.e. Glassy Carbon Electrode (GCE) and Platinum electrode. The influence of pH, concentration and scan rate has been studied. The experime…	0	1	English	PD drug, no DNA	Scopus	Der Pharmacia Lettre	4	6		1742	1755			https://www.scopus.com/inward/record.uri?eid=2-s2.0-84872810709&partnerID=40&md5=dc8b196e0133297ba59eb2f613a17afc	Electrochemical Research Laboratory, Department of Chemistry, University of Rajasthan, Jaipur-302055, India	Varshney, G., Electrochemical Research Laboratory, Department of Chemistry, University of Rajasthan, Jaipur-302055, India; Sharma, D.K., Electrochemical Research Laboratory, Department of Chemistry, University of Rajasthan, Jaipur-302055, India	Entacapone; Glassy carbon electrode; Limit of detection; Limit of quantification; Platinum electrode	carbon; entacapone; platinum; accuracy; article; calibration; concentration response; controlled study; cyclic potentiometry; differential pulse voltammetry; drug determination; drug stability; drug structure; limit of detection; limit of quantitation; pH; process optimization; sensitivity and specificity; tablet; validation process
Villeneuve L., Tiede L.M., Morsey B., Fox H.S.	Article	2013	Quantitative proteomics reveals oxygen-dependent changes in neuronal mitochondria affecting function and sensitivity to rotenone	Mitochondria are implicated in a variety of degenerative disorders and aging. Mitochondria are responsive to the oxygen in their environment, yet tissue culture is performed at atmospheric (21%) oxygen and not at physiological (1-11%) oxygen levels found in tissues. We employed imaging of mitochondrial probes, mass spectrometry, Western blots, and ATP assays of the human neuroblastoma cell-line S…	0	1	English	oxygen level in mitochondria	Scopus	Journal of Proteome Research	12	10		4599	4606		10.1021/pr400758d	https://www.scopus.com/inward/record.uri?eid=2-s2.0-84885214824&doi=10.1021%2fpr400758d&partnerID=40&md5=cac5071817c0d48f98304f1993dac781	Department of Pharmacology and Experimental Neuroscience, University of Nebraska Medical Center, 985800 Nebraska Medical Center, Omaha, NE 68198, United States	Villeneuve, L., Department of Pharmacology and Experimental Neuroscience, University of Nebraska Medical Center, 985800 Nebraska Medical Center, Omaha, NE 68198, United States; Tiede, L.M., Department of Pharmacology and Experimental Neuroscience, University of Nebraska Medical Center, 985800 Nebraska Medical Center, Omaha, NE 68198, United States; Morsey, B., Department of Pharmacology and Exper…	bioenergetics/electron transfer complex; hyperoxia; hypoxia; mitochondria; neurodegeneration; oxidative stress	adenosine triphosphate; oxygen; reactive oxygen metabolite; rotenone; article; cell function; concentration response; human; human cell; image analysis; immunoblotting; mass spectrometry; mitochondrion; molecular imaging; molecular probe; nerve cell; nerve cell culture; neuroblastoma cell; oxygen tissue level; priority journal; protein expression; proteomics; quantitative analysis; quantitative p…
Vinothkumar K.R., Zhu J., Hirst J.	Article	2014	Architecture of mammalian respiratory complex I	Complex I (NADH:ubiquinone oxidoreductase) is essential for oxidative phosphorylation in mammalian mitochondria. It couples electron transfer from NADH to ubiquinone with proton translocation across the energy-transducing inner membrane, providing electrons for respiration and driving ATP synthesis. Mammalian complex I contains 44 different nuclear- and mitochondrial-encoded subunits, with a comb…	0	0	English	structure of complex I, single-particle electron cryo-microscopy	Scopus	Nature	515	7525		80	84		10.1038/nature13686	https://www.scopus.com/inward/record.uri?eid=2-s2.0-84915761829&doi=10.1038%2fnature13686&partnerID=40&md5=103879b226a25dbdadf1b3b3df12cacf	MRC Laboratory of Molecular Biology, Francis Crick Avenue, Cambridge, CB2 0QH, United Kingdom; MRC Mitochondrial Biology Unit, Wellcome Trust/MRC Building, Hills Road, Cambridge, CB2 0XY, United Kingdom	Vinothkumar, K.R., MRC Laboratory of Molecular Biology, Francis Crick Avenue, Cambridge, CB2 0QH, United Kingdom; Zhu, J., MRC Mitochondrial Biology Unit, Wellcome Trust/MRC Building, Hills Road, Cambridge, CB2 0XY, United Kingdom; Hirst, J., MRC Mitochondrial Biology Unit, Wellcome Trust/MRC Building, Hills Road, Cambridge, CB2 0XY, United Kingdom		iron sulfur protein; reduced nicotinamide adenine dinucleotide dehydrogenase; reduced nicotinamide adenine dinucleotide dehydrogenase (ubiquinone); protein subunit; reduced nicotinamide adenine dinucleotide dehydrogenase (ubiquinone); bioenergetics; gene expression; homeostasis; mammal; metabolism; mitochondrion; mutation; respiration; translocation; ultrastructure; Article; binding site; Bos tau…
Virmani A., Binienda Z.	Review	2004	Role of carnitine esters in brain neuropathology	L-Carnitine (L-C) is a naturally occurring quaternary ammonium compound endogenous in all mammalian species and is a vital cofactor for the mitochondrial oxidation of fatty acids. Fatty acids are utilized as an energy substrate in all tissues, and although glucose is the main energetic substrate in adult brain, fatty acids have also been shown to be utilized by brain as an energy substrate. L-C a…	0	1	English	biochemistry, neuroscience but not DNA and PD	Scopus	Molecular Aspects of Medicine	25	5-6		533	549		10.1016/j.mam.2004.06.003	https://www.scopus.com/inward/record.uri?eid=2-s2.0-4444289045&doi=10.1016%2fj.mam.2004.06.003&partnerID=40&md5=0c16815f91915a25525196d741a978e1	Scientific Affairs, Sigma-tau HealthScience, Pomezia, Italy; Division of Neurotoxicology, Natl. Ctr. for Toxicological Res., Food and Drug Administration, 72079, Jefferson, AR, United States	Virmani, A., Scientific Affairs, Sigma-tau HealthScience, Pomezia, Italy; Binienda, Z., Division of Neurotoxicology, Natl. Ctr. for Toxicological Res., Food and Drug Administration, 72079, Jefferson, AR, United States	Acetyl-L-carnitine; Brain; Cell; FFA; L-Carnitine; Mitochondria	7 nitroindazole; acylcarnitine; alpha tocopherol; antioxidant; carnitine; catalase; melatonin; nitric oxide synthase inhibitor; pivampicillin; selenium; valproic acid; alloxan diabetes mellitus; Alzheimer disease; amyotrophic lateral sclerosis; attention deficit disorder; bioavailability; brain disease; carnitine deficiency; cell function; cell membrane; cerebellar ataxia; cerebrovascular acciden…
Vojinovic-Miloradov M., Koruga D.	Review	1997	Fullerene C60 and its application in biomedicine	Science and technology related to Fullerene C60 and related compounds have attracted the attention and research stems from the Fullerenes' beautiful symmetry, dazzling chemical and physical technologies and nanotechnologies. Modern history of fivefold symmetry and the icosahedron began in 1985, when Kroto/Smalley research team discovered the C60 molecule. The production of solid C60 by the Huffma…	0	0	English	not related to PD	Scopus	Archive of Oncology	5	3		109	117			https://www.scopus.com/inward/record.uri?eid=2-s2.0-0030744858&partnerID=40&md5=a6df078518cfbaa4cf016d54bd92452e	Department of Chemistry, Faculty of Science, University of Novi Sad, Trg Dositeja Obradovica 3, 21000 Novi Sad, Yugoslavia	Vojinovic-Miloradov, M., Department of Chemistry, Faculty of Science, University of Novi Sad, Trg Dositeja Obradovica 3, 21000 Novi Sad, Yugoslavia; Koruga, D., Department of Chemistry, Faculty of Science, University of Novi Sad, Trg Dositeja Obradovica 3, 21000 Novi Sad, Yugoslavia	Biomedical applications; Fullerenes; History of discovering; Molecule C60; Properties	carbon; dna; enzyme; fullerene; hydrocarbon; ion; antiviral activity; biomedicine; chemical structure; crystallization; cytotoxicity; dna cleavage; drug activity; electron transport; enzyme inhibition; membrane transport; nuclear magnetic resonance; review; scanning tunneling microscopy; solar energy; synthesis; vaporization
Vos M., Geens A., Böhm C., Deaulmerie L., Swerts J., Rossi M., Craessaerts K., Leites E.P., Seibler P., Rakovic A., Lohnau T., De Strooper B., Fendt S.-M., Morais V.A., Klein C., Verstreken P.	Article	2017	Cardiolipin promotes electron transport between ubiquinone and complex I to rescue PINK1 deficiency	PINK1 is mutated in Parkinson's disease (PD), and mutations cause mitochondrial defects that include inefficient electron transport between complex I and ubiquinone. Neurodegeneration is also connected to changes in lipid homeostasis, but how these are related to PINK1-induced mitochondrial dysfunction is unknown. Based on an unbiased genetic screen, we found that partial genetic and pharmacologi…	1	1	English	genetic, pharmacology, cardiolipin role in PINK-1 defect mitochondria	Scopus	Journal of Cell Biology	216	3		1	14		10.1083/jcb.201511044	https://www.scopus.com/inward/record.uri?eid=2-s2.0-85016297592&doi=10.1083%2fjcb.201511044&partnerID=40&md5=dac751259099d0a3aede997478fbd7fb	VIB Center for Brain and Disease Research, Leuven, 3000, Belgium; VIB Center for Cancer Biology, Leuven, 3000, Belgium; Department of Neurosciences, Leuven Research Institute for Neurodegenerative Disease, Belgium; Department of Oncology and Leuven Cancer Institute, KU Leuven, Leuven, 3000, Belgium; Institute of Neurogenetics, University of Luebeck, Luebeck, 23562, Germany; Instituto de Medicina …	Vos, M., VIB Center for Brain and Disease Research, Leuven, 3000, Belgium, Department of Neurosciences, Leuven Research Institute for Neurodegenerative Disease, Belgium, Institute of Neurogenetics, University of Luebeck, Luebeck, 23562, Germany; Geens, A., VIB Center for Brain and Disease Research, Leuven, 3000, Belgium, Department of Neurosciences, Leuven Research Institute for Neurodegenerative…		acetyl coenzyme A; cardiolipin; fatty acid synthase; malonyl coenzyme A; palmitic acid; reduced nicotinamide adenine dinucleotide dehydrogenase (ubiquinone); ubiquinone; cardiolipin; fatty acid synthase; protein kinase; reduced nicotinamide adenine dinucleotide dehydrogenase (ubiquinone); ubiquinone; adult; aged; animal cell; animal experiment; animal model; animal tissue; Article; controlled stu…
Webber P.J., Smith A.D., Sen S., Renfrow M.B., Mobley J.A., West A.B.	Article	2011	Autophosphorylation in the leucine-rich repeat kinase 2 (LRRK2) GTPase domain modifies kinase and GTP-binding activities	The leucine-rich repeat kinase 2 (LRRK2) protein has both guanosine triphosphatase (GTPase) and kinase activities, and mutation in either enzymatic domain can cause late-onset Parkinson disease. Nucleotide binding in the GTPase domain may be required for kinase activity, and residues in the GTPase domain are potential sites for autophosphorylation, suggesting a complex mechanism of intrinsic regu…	0	0	English	lrrk2, antibody detection	Scopus	Journal of Molecular Biology	412	1		94	110		10.1016/j.jmb.2011.07.033	https://www.scopus.com/inward/record.uri?eid=2-s2.0-84860389765&doi=10.1016%2fj.jmb.2011.07.033&partnerID=40&md5=9114222b336e4b9fc70f7892573cbed5	Department of Neurology, University of Alabama at Birmingham, Birmingham, AL 35294, United States; Center for Neurodegeneration and Experimental Therapeutics, University of Alabama at Birmingham, Birmingham, AL 35294, United States; Department of Surgery, University of Alabama at Birmingham, Birmingham, AL 35294, United States; Department of Biochemistry and Molecular Genetics, University of Alab…	Webber, P.J., Department of Neurology, University of Alabama at Birmingham, Birmingham, AL 35294, United States, Center for Neurodegeneration and Experimental Therapeutics, University of Alabama at Birmingham, Birmingham, AL 35294, United States; Smith, A.D., Department of Surgery, University of Alabama at Birmingham, Birmingham, AL 35294, United States, Department of Biochemistry and Molecular G…	dardarin; neurodegeneration; PARK8; Parkinson disease; serine/threonine kinase	alanine; guanosine triphosphatase; guanosine triphosphate; leucine rich repeat kinase 2; myelin basic protein; phosphotransferase; amino acid substitution; animal experiment; animal tissue; article; autophosphorylation; binding site; controlled study; electron transport; enzyme activity; enzyme binding; enzyme specificity; gene mutation; in vitro study; in vivo study; mouse; nonhuman; oligomeriza…
Wen Y., Li W., Poteet E.C., Xie L., Tan C., Yan L.-J., Ju X., Liu R., Qian H., Marvin M.A., Goldberg M.S., She H., Mao Z., Simpkins J.W., Yang S.-H.	Article	2011	Alternative mitochondrial electron transfer as a novel strategy for neuroprotection	Neuroprotective strategies, including free radical scavengers, ion channel modulators, and anti-inflammatory agents, have been extensively explored in the last 2 decades for the treatment of neurological diseases. Unfortunately, none of the neuroprotectants has been proved effective in clinical trails. In the current study, we demonstrated that methylene blue (MB) functions as an alternative elec…	0	1	English	biochemistry, MB as antioxidant (vs) for rotenone depleting DA	Scopus	Journal of Biological Chemistry	286	18		16504	16515		10.1074/jbc.M110.208447	https://www.scopus.com/inward/record.uri?eid=2-s2.0-79955528923&doi=10.1074%2fjbc.M110.208447&partnerID=40&md5=1852a66625f31e75da7f70a4e3fc6d03	Department of Pharmacology and Neuroscience, Institute for Alzheimer's Disease and Aging Research, University of North Texas Health Science Center, Fort Worth, TX 76107, United States; Department of Neurology, University of Texas Southwestern Medical Center, Dallas, TX 75390, United States; Department of Psychiatry, University of Texas Southwestern Medical Center, Dallas, TX 75390, United States;…	Wen, Y., Department of Pharmacology and Neuroscience, Institute for Alzheimer's Disease and Aging Research, University of North Texas Health Science Center, Fort Worth, TX 76107, United States; Li, W., Department of Pharmacology and Neuroscience, Institute for Alzheimer's Disease and Aging Research, University of North Texas Health Science Center, Fort Worth, TX 76107, United States; Poteet, E.C.…		Animal model; Anti-inflammatory agents; Cellular oxygen; Cerebral ischemia; Cerebral ischemia-reperfusion; Clinical trails; Cytochrome C; Dopaminergic neurons; Electron carrier; Electron transfer; Free radical scavengers; In-vitro; Ion channel; Methylene blue; Mitochondrial complex; Mitochondrial dysfunction; Nanomolar concentration; Neurological disease; Neuronal cell; Neuroprotection; Novel str…
Yang M.	Review Article	2017	The sea of stars in your heart -bring you a taste of the mystery of breathing	Respiration is one of the most basic features of living organisms, and this normally neglected process is orchestrated by a rather complicated molecule system. Mitochondria are the major place for respiration in mammals, and its shape can vary with different cell conditions, which in turn can influence the efficiency of respiration. Within mitochondria, respiratory chain complexes responsible for…	0	0	Chinese	Chinese language – not directly related PD DNA	Scopus	Kexue Tongbao/Chinese Science Bulletin	62	35		4077	4082		10.1360/N972017-00887	https://www.scopus.com/inward/record.uri?eid=2-s2.0-85076384169&doi=10.1360%2fN972017-00887&partnerID=40&md5=bcf2c2d22e94e57fde4243abe9610c28	Beijing Advanced Innovation Center for Structural Biology, School of Life Sciences, Tsinghua University, Beijing, 100084, China	Yang, M., Beijing Advanced Innovation Center for Structural Biology, School of Life Sciences, Tsinghua University, Beijing, 100084, China	Energy metabolism; Mitochondria; Respiratory chain supercomplex	Conformations; Dimers; Electron transitions; Mammals; Metabolism; Mitochondria; Molecular oxygen; Molecules; Neurodegenerative diseases; Proteins; Amyotrophic lateral sclerosis; Electrochemical gradients; Energy metabolism; Hereditary optic neuropathy; Insulin-dependent diabetes mellitus; Reactive oxygen species; Respiratory chain complex; Supercomplex; Scaffolds (biology)
Yang S.-H., Li W., Sumien N., Forster M., Simpkins J.W., Liu R.	Review	2017	Alternative mitochondrial electron transfer for the treatment of neurodegenerative diseases and cancers: Methylene blue connects the dots	Brain has exceptional high requirement for energy metabolism with glucose as the exclusive energy source. Decrease of brain energy metabolism and glucose uptake has been found in patients of Alzheimer's, Parkinson's and other neurodegenerative diseases, providing a clear link between neurodegenerative disorders and energy metabolism. On the other hand, cancers, including glioblastoma, have increa…	0	0	English	Methylene blue (MB) neuroprotective, ET alternative pathway	Scopus	Progress in Neurobiology	157			273	291		10.1016/j.pneurobio.2015.10.005	https://www.scopus.com/inward/record.uri?eid=2-s2.0-84966282818&doi=10.1016%2fj.pneurobio.2015.10.005&partnerID=40&md5=71f86e060b66578c47a48881acd6c676	Center for Neuroscience Discovery, University of North Texas Health Science Center, Fort Worth, TX 76107, United States; Department of Physiology and Pharmacology, Center for Neuroscience, Health Science Center, West Virginia University, Medical Center Drive, Morgantown, WV 26506, United States	Yang, S.-H., Center for Neuroscience Discovery, University of North Texas Health Science Center, Fort Worth, TX 76107, United States; Li, W., Center for Neuroscience Discovery, University of North Texas Health Science Center, Fort Worth, TX 76107, United States; Sumien, N., Center for Neuroscience Discovery, University of North Texas Health Science Center, Fort Worth, TX 76107, United States; For…	Cancer; Metabolism; Methylene blue; Mitochondria electron transport chain; Neurodegeneration	acetyl coenzyme A carboxylase; adenylate kinase; cyclin dependent kinase; lactic acid; methylene blue; methylene blue; neuroprotective agent; aerobic glycolysis; Alzheimer disease; astrocyte; bioenergy; brain blood flow; brain metabolism; cancer cell; cancer therapy; carcinogenesis; degenerative disease; electron transport; energy metabolism; enzyme activation; glioblastoma; glucose transport; Hu…
Yue X., Hariri D.J., Caballero B., Zhang S., Bartlett M.J., Kaut O., Mount D.W., Wüllner U., Sherman S.J., Falk T.	Article	2014	Comparative study of the neurotrophic effects elicited by VEGF-B and GDNF in preclinical in vivo models of Parkinson's disease	Vascular endothelial growth factor B (VEGF-B) has recently been shown to be a promising novel neuroprotective agent for several neurodegenerative conditions. In the current study we extended previous work on neuroprotective potential for Parkinson's disease (PD) by testing an expanded dose range of VEGF-B (1 and 10. μg) and directly comparing both neuroprotective and neurorestorative effects of V…	0	0	English	neuroprotective agent VEGF-B, dose comparison study to treat PD	Scopus	Neuroscience	258			385	400		10.1016/j.neuroscience.2013.11.038	https://www.scopus.com/inward/record.uri?eid=2-s2.0-84891093236&doi=10.1016%2fj.neuroscience.2013.11.038&partnerID=40&md5=724faef9c3973af4d4f1e9a59fcadc32	Department of Neurology, University of Arizona, Tucson, AZ 85724, United States; Graduate Interdisciplinary Program in Physiological Sciences, University of Arizona, Tucson, AZ 85724, United States; Department of Neurology, University of Bonn, 53105 Bonn, Germany; Bioinformatics Shared Service, Arizona Cancer Center, University of Arizona, Tucson AZ 85724, United States	Yue, X., Department of Neurology, University of Arizona, Tucson, AZ 85724, United States; Hariri, D.J., Graduate Interdisciplinary Program in Physiological Sciences, University of Arizona, Tucson, AZ 85724, United States; Caballero, B., Graduate Interdisciplinary Program in Physiological Sciences, University of Arizona, Tucson, AZ 85724, United States; Zhang, S., Department of Neurology, Universi…	FATP1; FATP4; Human substantia nigra pars compacta; Mitochondria; Neuroprotective factors; Rodent 6-OHDA model	amphetamine; fatty acid; fatty acid transporter; glial cell line derived neurotrophic factor; neuromelanin; neuroprotective agent; oxidopamine; tyrosine 3 monooxygenase; vasculotropin B; animal experiment; animal model; animal tissue; article; cell loss; circling behavior; comparative study; controlled study; fatty acid metabolism; immunohistochemistry; in vivo study; male; mesencephalon; mitocho…
Zeng D., Salvatore P., Karlsen K.K., Zhang J., Wengel J., Ulstrup J.	Article	2020	Electrochemical intercalator binding to single- and double-strand DNA- and LNA-based molecules on Au(111)-electrode surfaces	We have explored and compared interfacial electrochemical electron transfer (ET) of three organic aromatic redox molecules, methylene blue (MB), resorufin (RSF), and anthraquinone monosulfonate (AQMS), non-covalently bound to single- and double-strand (ss and ds) DNA- and LNA-based (“locked nucleic acids”) oligonucleotides (ONs). The redox probes were chosen for their equilibrium potentials and p…	1	1	English	DNA, ET, STM, but no PD	Scopus	Journal of Electroanalytical Chemistry	865		114138				10.1016/j.jelechem.2020.114138	https://www.scopus.com/inward/record.uri?eid=2-s2.0-85084919021&doi=10.1016%2fj.jelechem.2020.114138&partnerID=40&md5=ea70a2d3c012eead044f8a2d3c95b326	Shanghai Key Laboratory of Molecular Imaging, Shanghai University of Medicine & Health Sciences, Shanghai, 201318, China; Department of Chemistry, Technical University of Denmark, Kemitorvet, Building 207, Kongens Lyngby, DK-2800, Denmark; Department of Physics, Chemistry and Pharmacy, University of Southern Denmark, Campusvej 55, Odense M, DK-5230, Denmark; Kazan National Research Technological …	Zeng, D., Shanghai Key Laboratory of Molecular Imaging, Shanghai University of Medicine & Health Sciences, Shanghai, 201318, China, Department of Chemistry, Technical University of Denmark, Kemitorvet, Building 207, Kongens Lyngby, DK-2800, Denmark; Salvatore, P., Department of Chemistry, Technical University of Denmark, Kemitorvet, Building 207, Kongens Lyngby, DK-2800, Denmark; Karlsen, K.K., D…	Anthraquinone monosulfonate; Au(111)-electrodes; DNA-ologonucleotides; in situ STM; Intercalation; LNA-nucleotides; Methylene blue; Resorufin	Aromatic compounds; DNA; Electrochemistry; Electron transitions; Electrostatics; Ketones; Oligonucleotides; Probes; Scanning tunneling microscopy; Single crystals; Electrochemical control; Electrochemical electron; Electrostatic binding; Electrostatic charges; Equilibrium potentials; Locked nucleic acid; Single crystal electrodes; Voltammetric signals; Electrochemical electrodes
Zhang J., Chi Q., Albrecht T., Kuznetsov A.M., Grubb M., Hansen A.G., Wackerbarth H., Welinder A.C., Ulstrup J.	Conference Paper	2005	Electrochemistry and bioelectrochemistry towards the single-molecule level: Theoretical notions and systems	Surface structures controlled at the nanometer and single-molecule levels, with functions crucially determined by interfacial electron transfer (ET) are broadly reported in recent years, with different kinds of electrochemically controlled nanoscale/single molecule systems. One is the broad class of metallic and semiconductor-based nanoparticles, nano-arrays, nanotubes, and nanopits. Others are b…	2	1	English	ET, DNA, no PD	Scopus	Electrochimica Acta	50	15		3143	3159		10.1016/j.electacta.2004.12.044	https://www.scopus.com/inward/record.uri?eid=2-s2.0-17744389373&doi=10.1016%2fj.electacta.2004.12.044&partnerID=40&md5=ba07d9c48944c6856b6e0b3ae7c68e11	Department of Chemistry, Building 207, Nano. DTU, Tech. Univ. of Denmark, DK-2800 Lyngby, Denmark; A.N. Frumkin Inst. Electrochem. R., Leninskij Prospect 31, 117071 Moscow, Russian Federation	Zhang, J., Department of Chemistry, Building 207, Nano. DTU, Tech. Univ. of Denmark, DK-2800 Lyngby, Denmark; Chi, Q., Department of Chemistry, Building 207, Nano. DTU, Tech. Univ. of Denmark, DK-2800 Lyngby, Denmark; Albrecht, T., Department of Chemistry, Building 207, Nano. DTU, Tech. Univ. of Denmark, DK-2800 Lyngby, Denmark; Kuznetsov, A.M., A.N. Frumkin Inst. Electrochem. R., Leninskij Prosp…	Biomolecular conductivity; Electrochemical nanoscience; Single-molecule devices; STM of redox molecules; Tunnelling spectroscopy	Biochemistry; Electron transitions; Enzymes; Monolayers; Nanostructured materials; Organometallics; Redox reactions; Scanning tunneling microscopy; Surface structure; Biomolecular conductivity; Biomolecules; Electrochemical nanoscience; Single-molecule devices; STM of redox molecules; Tunneling spectroscopy; Electrochemistry
Zhang J., Grubb M., Hansen A.G., Kuznetsov A.M., Boisen A., Wackerbarth H., Ulstrup J.	Conference Paper	2003	Electron transfer behaviour of biological macromolecules towards the single-molecule level	A discussion about the electron transfer behaviour of biological macromolecules towards the single-molecule level was presented. Nanoscale bioelectrochemistry was found to be based on redox metalloproteins/metalloenzymes as well as on synthetic oligonucleotides. It was showed that oligonucleotides were characterized towards the single-molecule level for addressing the DNA electronic conduction me…	1	1	English	ET in biomolecules DNA	Scopus	Journal of Physics Condensed Matter	15	18		S1873	S1890		10.1088/0953-8984/15/18/318	https://www.scopus.com/inward/record.uri?eid=2-s2.0-0037959624&doi=10.1088%2f0953-8984%2f15%2f18%2f318&partnerID=40&md5=ce18c7e71bcd23d17521465051f81a69	Department of Chemistry, Building 207, Technical University of Denmark, DK-2800 Lyngby, Denmark; A N Frumkin Inst. of Electrochem., Russian Academy of Sciences, Leninskij Prospect 31, 117071 Moscow, Russian Federation; Microelectronics Centre, Building 345, Technical University of Denmark, DK-2800 Lyngby, Denmark	Zhang, J., Department of Chemistry, Building 207, Technical University of Denmark, DK-2800 Lyngby, Denmark; Grubb, M., Department of Chemistry, Building 207, Technical University of Denmark, DK-2800 Lyngby, Denmark; Hansen, A.G., Department of Chemistry, Building 207, Technical University of Denmark, DK-2800 Lyngby, Denmark; Kuznetsov, A.M., A N Frumkin Inst. of Electrochem., Russian Academy of S…		Biofilms; Capacitance; Characterization; Electrochemistry; Electrodes; Electron transitions; Proteins; Redox reactions; Scanning tunneling microscopy; Single crystals; Synthesis (chemical); Volumetric analysis; X ray photoelectron spectroscopy; Interfacial capacitance; DNA
Zhao R.-Z., Jiang S., Zhang L., Yu Z.-B.	Review	2019	Mitochondrial electron transport chain, ROS generation and uncoupling (Review)	The mammalian mitochondrial electron transport chain (ETC) includes complexes I-IV, as well as the electron transporters ubiquinone and cytochrome c. There are two electron transport pathways in the ETC: Complex I/III/IV, with NADH as the substrate and complex II/III/IV, with succinic acid as the substrate. The electron flow is coupled with the generation of a proton gradient across the inner mem…	0	1	English	biochemistry, not related to PD	Scopus	International Journal of Molecular Medicine	44	1		3	15		10.3892/ijmm.2019.4188	https://www.scopus.com/inward/record.uri?eid=2-s2.0-85067374171&doi=10.3892%2fijmm.2019.4188&partnerID=40&md5=3edf70d05c2f49ab60f0afe93f03e8f0	department of Aerospace Physiology, Fourth Military Medical University, Xi'an, Shaanxi, 710032, China; department of Aerospace Physiology, Fourth Military Medical University, 169 changle West Road, Xi'an, Shaanxi, 710032, China	Zhao, R.-Z., department of Aerospace Physiology, Fourth Military Medical University, Xi'an, Shaanxi, 710032, China; Jiang, S., department of Aerospace Physiology, Fourth Military Medical University, Xi'an, Shaanxi, 710032, China; Zhang, L., department of Aerospace Physiology, Fourth Military Medical University, Xi'an, Shaanxi, 710032, China; Yu, Z.-B., department of Aerospace Physiology, Fourth M…	Complex; Electron transport chain; Mitochondria; Oxidative stress; Proton leak; Reactive oxygen species; Uncoupling protein	cytochrome c oxidase; proton transporting adenosine triphosphate synthase; reactive oxygen metabolite; reduced nicotinamide adenine dinucleotide dehydrogenase (ubiquinone); succinate dehydrogenase (ubiquinone); ubiquinol cytochrome c reductase; unclassified drug; uncoupling protein; uncoupling protein 1; uncoupling protein 2; uncoupling protein 3; uncoupling protein 4; uncoupling protein 5; multi…
Zhou W.-H., Wang H.-H., Li W.-T., Guo X.-C., Kou D.-X., Zhou Z.-J., Meng Y.-N., Tian Q.-W., Wu S.-X.	Article	2018	Gold nanoparticles sensitized ZnO nanorods arrays for dopamine electrochemical sensing	One-dimensional nanostructure materials offer opportunities for improving performance of electrochemical sensors. In this work, vertically ZnO nanorods (ZNRs) sensitized with gold nanoparticles (GNPs) were designed and fabricated onto indium tin oxide coated polyethylene terephthalate (ITO/PET) film for dopamine sensing. ZNRs that helpful for electric signal collecting by providing electron trans…	1	1	English	PD, dopamine biosensor detection although not DNA related	Scopus	Journal of the Electrochemical Society	165	12		G3001	G3007		10.1149/2.0011811jes	https://www.scopus.com/inward/record.uri?eid=2-s2.0-85062380508&doi=10.1149%2f2.0011811jes&partnerID=40&md5=80a00a1903ed106a6d909d04c008d5b5	Key Laboratory for Special Functional Materials of MOE, Henan University, Kaifeng, 475004, China; Joint International Research Laboratory of Food and Medicine, Henan University, Kaifeng, 475004, China	Zhou, W.-H., Key Laboratory for Special Functional Materials of MOE, Henan University, Kaifeng, 475004, China; Wang, H.-H., Key Laboratory for Special Functional Materials of MOE, Henan University, Kaifeng, 475004, China; Li, W.-T., Joint International Research Laboratory of Food and Medicine, Henan University, Kaifeng, 475004, China; Guo, X.-C., Joint International Research Laboratory of Food an…		Amines; Electrodeposition; Electrodes; Fiber optic sensors; Gold nanoparticles; II-VI semiconductors; Metal nanoparticles; Nanorods; Neurodegenerative diseases; Neurophysiology; Plastic bottles; Tin oxides; Zinc oxide; Electrocatalytic activity; Electrochemical sensing; Electron transfer pathways; Gold nanoparticles (GNPs); Improving performance; Linear dynamic ranges; One-dimensional nanostructu…
Zhu X., Hu J., Zhao Z., Sun M., Chi X., Wang X., Gao J.	Article	2015	Kinetic and sensitive analysis of tyrosinase activity using electron transfer complexes: In vitro and intracellular study	Tyrosinase is an important marker of human diseases such as the neurodegeneration associated with Parkinson's disease and melanoma. Sensitive detection of tyrosinase activity in vitro and inside cells is of great significance to medical diagnostics and skin disorder treatments. With unique photophysical properties, semiconductor quantum dots (QDs) are employed as photoluminescent platforms for va…	2	1	English	QD biomarker, tyrosine as marker for PD, EC, NO STM	Scopus	Small	11	7		862	870		10.1002/smll.201401595	https://www.scopus.com/inward/record.uri?eid=2-s2.0-84922967130&doi=10.1002%2fsmll.201401595&partnerID=40&md5=22ab9020f6b98a34756eb6c1804d44be	State Key Laboratory of Physical Chemistry of Solid Surfaces, College of Chemistry and Chemical Engineering, Xiamen University, Xiamen, 361005, China; Fujian Provincial Key Laboratory of Chronic Liver Disease and Hepatocellular Carcinoma, Zhongshan Hospital, Xiamen University, Xiamen, 361004, China	Zhu, X., State Key Laboratory of Physical Chemistry of Solid Surfaces, College of Chemistry and Chemical Engineering, Xiamen University, Xiamen, 361005, China; Hu, J., State Key Laboratory of Physical Chemistry of Solid Surfaces, College of Chemistry and Chemical Engineering, Xiamen University, Xiamen, 361005, China; Zhao, Z., State Key Laboratory of Physical Chemistry of Solid Surfaces, College …		Amino acids; Dermatology; Diagnosis; Enzyme activity; Neurodegenerative diseases; Oncology; Quenching; Scaffolds (biology); Enzymatic activities; Fluorescence quenching; Highly sensitive detections; Medical diagnostics; Photophysical properties; Quenching efficiency; Sensitive detection; Zwitter ionic molecule; Semiconductor quantum dots; dopachrome; indole derivative; monophenol monooxygenase; q…

## Sheet: Databases
Database	For screening
Scopus	107
ScienceDirect	8
EBSCOHost MEDLINE	8
Total	123
